# Supplementary material for: Comprehensive Profiling of ceRNA (circRNA-miRNA-mRNA) Networks in Hypothalamic-Pituitary-Mammary Gland Axis of Dairy Cows under Heat Stress
Source: MDPI journal article supplement (doi:10.3390/ijms24010888), 2023-01-03
Supplement: s1 [file s1]

Figure S1. GO functional enrichment analysis on the target genes of DE miRNAs in the hypothalamus, pituitary, mammary gland in dairy cows under heat stress.

Figure S2. GO functional enrichment analysis on DE mRNAs in the hypothalamus, pituitary, mammary gland in dairy cows under heat stress.
