# Supplementary material for: Comprehensive Profiling of ceRNA (circRNA-miRNA-mRNA) Networks in Hypothalamic-Pituitary-Mammary Gland Axis of Dairy Cows under Heat Stress
Source: Int J Mol Sci. 2023 Jan 3;24(1):888. doi: 10.3390/ijms24010888 (PMC9821774; doi:10.3390/ijms24010888)
Supplement: Supplementary file 1 [file ijms-24-00888-s001.zip › Supplementary Table.xlsx]

## Sheet: TableS1
		Table S1. Summary of the sequencing data
Sample	RawData(bp)	CleanData(bp)	Q20	Q30	GC
NHS_H1	12625857600	12299276409	0.9617	0.9015	0.4648
NHS_H2	15032684100	14474340310	0.9618	0.9033	0.5357
NHS_H3	15293223600	14801031021	0.9595	0.8993	0.5362
NHS_P1	13777028400	13519398355	0.9623	0.9031	0.4912
NHS_P2	14839248300	14242183334	0.9606	0.9004	0.5186
NHS_P3	12758256600	12491417834	0.9627	0.9039	0.4882
NHS_M1	13864505700	13474759169	0.96	0.8991	0.5225
NHS_M2	13738353600	13406067127	0.9589	0.8971	0.5408
NHS_M3	13578994200	13201343720	0.9556	0.8924	0.5454
HS_H1	14746765500	14330084613	0.9604	0.9005	0.5485
HS_H2	12010344300	11614637827	0.9642	0.9077	0.5386
HS_H3	14067345300	13689127701	0.9615	0.9022	0.5467
HS_P1	19739236800	19282028096	0.9524	0.8867	0.6237
HS_P2	21280226100	20625250702	0.9502	0.8829	0.6489
HS_P3	18499515900	18056665923	0.9547	0.8919	0.6303
HS_M1	14882732100	14394773018	0.9539	0.8898	0.6217
HS_M2	21445325100	20670405220	0.9504	0.8846	0.6376
HS_M3	20684347200	20060158497	0.9534	0.8891	0.6242

## Sheet: TableS2
		Table S2. The genomic mapping results of clean reads
Sample	Total reads	Total mapped reads (%)	Uniquely mapped reads (%)	Multiplely mapped reads (%)	Unmapped reads (%)
NHS_H1	12619704	85.4	33.04	52.37	14.6
NHS_H2	15437826	81.08	33.03	48.04	18.92
NHS_H3	18289326	84.33	33.51	50.81	15.67
NHS_P1	14003738	85.63	32.64	52.99	14.37
NHS_P2	15643382	81.56	32.09	49.47	18.44
NHS_P3	13033570	85.84	32.53	53.31	14.16
NHS_M1	14721026	83.29	31.25	52.04	16.71
NHS_M2	17336944	83.77	33.48	50.3	16.23
NHS_M3	18557194	84.63	32.01	52.62	15.37
HS_H1	15808498	83.6	33.43	50.17	16.4
HS_H2	10684660	81.43	32.2	49.23	18.57
HS_H3	13954396	82.57	33.36	49.21	17.43
HS_P1	28583988	84.74	32.25	52.49	15.26
HS_P2	33092048	84.64	32.25	52.39	15.36
HS_P3	27101132	84.9	30.77	54.12	15.1
HS_M1	21840838	84.7	30.55	54.15	15.3
HS_M2	33958946	84.54	30.15	54.39	15.46
HS_M3	31278828	83.89	30.42	53.47	16.11

## Sheet: TableS3
		Table S3. The expression of key molecules on the HPMA
Tissue	ID	log2(FoldChange)	PValue	FDR	Symbol	Description	GO	KEGG	Expression level
hypothalamus	ENSBTAG00000005012	2.39977	9.9158e-09	8.4629e-06	HSPH1	heat shock protein family H (Hsp110) member 1 [Source:VGNC Symbol;Acc:VGNC:53817]	GO:0005654;GO:0005737;GO:0005829;GO:0005874;GO:0032991;GO:0000774;GO:0043014;GO:0051085.	Ko04141	upregulated
pituitary	ENSBTAG00000017407	3.58617	2.75435e-37	2.46751e-35	HSF2BP	heat shock transcription factor 2 binding protein [Source:VGNC Symbol;Acc:VGNC:29983]	GO:0005694;GO:0007141;GO:0007283;GO:1990918	-	upregulated
	ENSBTAG00000015692	-3.18266	9.85864e-30	5.10795e-28	HSPA4L	heat shock protein family A (Hsp70) member 4 like [Source:VGNC Symbol;Acc:VGNC:53906]	GO:0005634;GO:0005829;GO:0016020;GO:0016021;GO:0000166;GO:0005524;GO:0016887	K09485	downregulated
	ENSBTAG00000030749	-2.42782	4.18122e-21	1.07249e-19	DNAJC6	DnaJ heat shock protein family (Hsp40) member C6 [Source:VGNC Symbol;Acc:VGNC:55167]	GO:0014069;GO:0045202;GO:0098793;GO:0016191;GO:0072318;GO:2000369.	K09526	downregulated
	ENSBTAG00000007662	1.66898	4.98971e-14	6.21068e-13	HSPA5	heat shock protein family A (Hsp70) member 5 [Source:VGNC Symbol;Acc:VGNC:59220]	GO:0005634;GO:0005737;GO:0005739;GO:0005783;GO:0005788;GO:0005789;GO:0005793;GO:0005829;GO:0005886;GO:0008180;GO:0009986;GO:003017;GO:0030496;GO:0032991;GO:0034663;GO:0043231;GO:0005524;GO:0019899;GO:0019904;GO:0031625;GO:0043022;GO:0051787;GO:0006983;GO:0021589;GO:0021680;GO:0030335;GO:0030512;GO:0030968;GO:0031204;GO:0031398;GO:0035437;GO:0042149;GO:0043066;GO:0051603;GO:0071353;GO:1901998.	K09490;K09490;K09490;K09490	upregulated
	ENSBTAG00000004426	-2.7176	3.24408e-12	3.2649e-11	DNAJB14	DnaJ heat shock protein family (Hsp40) member B14 [Source:VGNC Symbol;Acc:VGNC:53699]	GO:0005783;GO:0030544;GO:0034622;GO:0051085.	-	downregulated
	ENSBTAG00000021752	-2.40411	1.05519e-11	9.948e-11	DNAJB4	DnaJ heat shock protein family (Hsp40) member B4 [Source:VGNC Symbol;Acc:VGNC:55166]	GO:0005654;GO:0005829;GO:0005886;GO:0001671;GO:0051082;GO:0051087;GO:0006457.	-	downregulated
	ENSBTAG00000015942	-1.60185	1.01828e-08	6.48406e-08	DNAJA4	DnaJ heat shock protein family (Hsp40) member A4 [Source:VGNC Symbol;Acc:VGNC:53935]	GO:0005829;GO:0016020;GO:0005524;GO:0030544/;GO:0031072;GO:0046872//metal ion binding;GO:0051082;GO:0051087;GO:0006457;GO:0009408;GO:0010596;GO:0010628;GO:0042026;GO:0090084.	-	downregulated
	ENSBTAG00000000949	-2.37406	8.20092e-08	4.53457e-07	DNAJC9	DnaJ heat shock protein family (Hsp40) member C9 [Source:VGNC Symbol;Acc:VGNC:55985]	GO:0005615;GO:0005634;GO:0005654;GO:0005737;GO:0005829;GO:0005886;GO:0016020;GO:0016021;GO:0031072;GO:0032781	-	downregulated
	ENSBTAG00000003784	-2.2728	2.05374e-07	1.05746e-06	DNAJC2	DnaJ heat shock protein family (Hsp40) member C2 [Source:VGNC Symbol;Acc:VGNC:53636]	-	-	downregulated
	ENSBTAG00000007807	1.44088	2.51026e-06	1.08308e-05	HSPA2	heat shock protein family A (Hsp70) member 2 [Source:NCBI gene (formerly Entrezgene);Acc:281827]	GO:0000795;GO:0001673;GO:0005634;GO:0005737;GO:0005829;GO:0005886;GO:0009986;GO:0036128;GO:0072687;GO:0000166;GO:0005524;GO:0016887;GO:0019899;GO:0031072;GO:0044183;GO:0051082;GO:0051787;GO:0051861;GO:0097718;GO:0001934;GO:0007140;GO:0007141;GO:0007283;GO:0007286;GO:0009408;GO:0009409;GO:0010971;GO:0016192;GO:0032781;GO:0034620;GO:0042026;GO:0051085;GO:0070194;GO:0090084;GO:1901896	K03283;K03283;K03283;K03283;K03283;K03283;K03283;K03283;K03283;K03283	upregulated
	ENSBTAG00000018239	-1.60988	3.06663e-06	1.30608e-05	DNAJC27	DnaJ heat shock protein family (Hsp40) member C27 [Source:VGNC Symbol;Acc:VGNC:59212]	GO:0005634;GO:0003924;GO:0005525;GO:0043410;GO:0070374;GO:0071701	-	downregulated
	ENSBTAG00000015683	-1.42783	1.2108e-05	4.6367e-05	HSPA4	heat shock protein family A (Hsp70) member 4 [Source:VGNC Symbol;Acc:VGNC:52242]	GO:0005634;GO:0005737;GO:0005739;GO:0005829;GO:0070062;GO:0000166;GO:0005524;GO:0016887;GO:0045040;GO:0051131	K09489;K09489	downregulated
	ENSBTAG00000001166	-2.46684	3.47481e-05	0.000123327	HSF5	heat shock transcription factor 5 [Source:VGNC Symbol;Acc:VGNC:29985]	GO:1990837	-	downregulated
	ENSBTAG00000009187	-2.25771	0.000255236	0.000769643	DNAJC28	DnaJ heat shock protein family (Hsp40) member C28 [Source:VGNC Symbol;Acc:VGNC:53536]	GO:0017119;GO:0006890;GO:0007030;GO:0048213	-	downregulated
	ENSBTAG00000000771	-1.79317	0.000319443	0.00094739	DNAJB6	DnaJ heat shock protein family (Hsp40) member B6 [Source:VGNC Symbol;Acc:VGNC:53635]	GO:0005634;GO:0005654;GO:0005829;GO:0030018;GO:0048471;GO:0001671;GO:0031072;GO:0051082;GO:0051087;GO:0006457;GO:0032880;GO:0043154;GO:0045109;GO:0090084	-	downregulated
	ENSBTAG00000053436	-1.50771	0.00139078	0.00359067	HSBP1	heat shock factor binding protein 1 [Source:NCBI gene (formerly Entrezgene);Acc:767979]	GO:0003714;GO:0042802	-	downregulated
	ENSBTAG00000050888	-1.51331	0.00235513	0.00583044	DNAJC24	DnaJ heat shock protein family (Hsp40) member C24 [Source:VGNC Symbol;Acc:VGNC:54631]	GO:0001671;GO:0046872;GO:003278	-	downregulated
	ENSBTAG00000003757	-1.41152	0.00299503	0.00724881	DNAJA2	DnaJ heat shock protein family (Hsp40) member A2 [Source:NCBI gene (formerly Entrezgene);Acc:360006]	GO:0005524;GO:0030544;GO:0031072;GO:0046872;GO:0051082;GO:0006457;GO:0009408	K09503	downregulated
	ENSBTAG00000002654	-1.48981	0.00417313	0.00976612	DNAJC7	DnaJ heat shock protein family (Hsp40) member C7 [Source:VGNC Symbol;Acc:VGNC:55817]	GO:0005654;GO:0005737;GO:0005829;GO:0005515;GO:0031072;GO:0051085	-	downregulated
	ENSBTAG00000006270	-1.22545	0.0234138	0.0456999	HSP90AA1	heat shock protein 90 alpha family class A member 1 [Source:VGNC Symbol;Acc:VGNC:53940]	GO:0005737;GO:0005829;GO:0032991;GO:0042470;GO:0043025;GO:0044294;GO:0044295;GO:0048471;GO:0000166;GO:0005524;GO:0016887;GO:0030235;GO:0042802;GO:0044183;GO:0051082;GO:0006457;GO:0021955;GO:0030010;GO:0033138;GO:0034605;GO:0045429;GO:0048675;GO:0051897;GO:1903827	K04079;K04079;K04079;K04079;K04079;K04079;K04079;K04079;K04079;K04079;K04079;K04079;K04079	downregulated
mammary gland	ENSBTAG00000004426	-1.97383	2.48835e-17	1.73543e-15	DNAJB14	DnaJ heat shock protein family (Hsp40) member B14 [Source:VGNC Symbol;Acc:VGNC:53699]	GO:0005783;GO:0030544;GO:0034622;GO:0051085	-	downregulated
	ENSBTAG00000012908	-1.81773	2.62888e-17	1.82619e-15	HSPA13	heat shock protein family A (Hsp70) member 13 [Source:VGNC Symbol;Acc:VGNC:53581]	-	-	downregulated
	ENSBTAG00000003784	-2.36111	1.6982e-16	1.05091e-14	DNAJC2	DnaJ heat shock protein family (Hsp40) member C2 [Source:VGNC Symbol;Acc:VGNC:53636]	-	-	downregulated
	ENSBTAG00000021752	-2.09473	2.47243e-10	5.80146e-09	DNAJB4	DnaJ heat shock protein family (Hsp40) member B4 [Source:VGNC Symbol;Acc:VGNC:55166]	GO:0005654;GO:0005829;GO:0005886;GO:0001671;GO:0051082;GO:0051087;GO:0006457	-	downregulated
	ENSBTAG00000030749	-2.33342	1.01717e-09	2.14351e-08	DNAJC6	DnaJ heat shock protein family (Hsp40) member C6 [Source:VGNC Symbol;Acc:VGNC:55167]	GO:0014069;GO:0045202;GO:0098793;GO:0016191;GO:0072318;GO:2000369	K09526	downregulated
	ENSBTAG00000002966	-1.58887	2.2e-08	3.5375e-07	DNAJC13	DnaJ heat shock protein family (Hsp40) member C13 [Source:VGNC Symbol;Acc:VGNC:53532]	GO:0005829;GO:0010008;GO:0031901;GO:0043231;GO:0071203;GO:0006898;GO:0007032;GO:1902954;GO:2000641	-	downregulated
	ENSBTAG00000025442	2.29324	4.62448e-08	6.91116e-07	HSPA1L	heat shock 70kDa protein 1-like [Source:NCBI gene (formerly Entrezgene);Acc:540190]	GO:0002199;GO:0005829;GO:0008180;GO:0044297;GO:0031072;GO:0031625;GO:0051082;GO:0007339;GO:0042026;GO:1903955	K03283;K03283;K03283;K03283;K03283;K03283;K03283;K03283;K03283;K03283	downregulated
	ENSBTAG00000012946	-1.45291	4.09021e-07	4.89017e-06	HSF2	heat shock transcription factor 2 [Source:VGNC Symbol;Acc:VGNC:29982]	GO:0005634;GO:0005654;GO:0005737;GO:0000977;GO:0000978;GO:0001162;GO:0001228;GO:0003677;GO:0003700;GO:0042802;GO:0043565;GO:1990837;GO:0006355;GO:0006357;GO:0007283;GO:0045944	-	downregulated
	ENSBTAG00000002654	-1.29105	6.97398e-06	6.13377e-05	DNAJC7	DnaJ heat shock protein family (Hsp40) member C7 [Source:VGNC Symbol;Acc:VGNC:55817]	GO:0005654;GO:0005737;GO:0005829;GO:0005515;GO:0031072;GO:0051085	-	downregulated
	ENSBTAG00000003514	-1.76143	7.41756e-06	6.48253e-05	HSF4	heat shock transcription factor 4 [Source:VGNC Symbol;Acc:VGNC:29984]	GO:0000785;GO:0005634//nucleus;GO:0016607//nuclear speckGO:0000978//RNA polymerase II proximal promoter sequence-specific DNA binding;GO:0000981//DNA-binding transcription factor activity, RNA polymerase II-specific;GO:0003677//DNA binding;GO:0003700//DNA-binding transcription factor activity;GO:0042802//identical protein binding;GO:0043565//sequence-specific DNA binding;GO:1990837//sequence-spec…	-	downregulated
	ENSBTAG00000008390	-1.53926	3.56146e-05	0.000256738	DNAJC10	DnaJ heat shock protein family (Hsp40) member C10 [Source:VGNC Symbol;Acc:VGNC:49056]	GO:0005783;GO:0005788;GO:0016020;GO:0016021;GO:0015035;GO:0015036;GO:0016491;GO:0016671;GO:0030433;GO:0034975	K09530	downregulated
	ENSBTAG00000025441	2.34209	0.000115699	0.000713976	HSPA1A	heat shock protein family A (Hsp70) member 1A [Source:NCBI gene (formerly Entrezgene);Acc:282254]	-	K03283;K03283;K03283;K03283;K03283;K03283;K03283;K03283;K03283;K03283	upregulated
	ENSBTAG00000016874	1.31944	0.000304124	0.00164309	DNAJB1	DnaJ heat shock protein family (Hsp40) member B1 [Source:NCBI gene (formerly Entrezgene);Acc:538426]	GO:0005654;GO:0005737;GO:0005829;GO:0001671;GO:0003714;GO:0030544;GO:0044183;GO:0051082;GO:0051087;GO:0051117;GO:0006457;GO:0032781;GO:0051085;GO:0090084;GO:0097201	K09507;K09507	upregulated
	ENSBTAG00000018239	-1.43093	0.0013758	0.00600737	DNAJC27	DnaJ heat shock protein family (Hsp40) member C27 [Source:VGNC Symbol;Acc:VGNC:59212]	GO:0005634;GO:0003924;GO:0005525;GO:0043410;GO:0070374;GO:0071701	-	downregulated
	ENSBTAG00000016451	-1.04031	0.00140163	0.00610196	HSPA14	heat shock protein family A (Hsp70) member 14 [Source:NCBI gene (formerly Entrezgene);Acc:534751]	GO:0005737;GO:0005829;GO:0000166;GO:0005524;GO:0016887	-	downregulated
	ENSBTAG00000050888	-1.64652	0.00357839	0.0136273	DNAJC24	DnaJ heat shock protein family (Hsp40) member C24 [Source:VGNC Symbol;Acc:VGNC:54631]	GO:0001671;GO:0046872;GO:0032781	-	downregulated
	ENSBTAG00000009187	-2.11221	0.00611727	0.0214294	DNAJC28	DnaJ heat shock protein family (Hsp40) member C28 [Source:VGNC Symbol;Acc:VGNC:53536]	GO:001711;GO:0006890;GO:0007030;GO:0048213	-	downregulated
	ENSBTAG00000015648	-1.18728	0.00741489	0.0252112	DNAJC21	DnaJ heat shock protein family (Hsp40) member C21 [Source:NCBI gene (formerly Entrezgene);Acc:509302]	GO:0005730;GO:0005829;GO:0003676;GO:0008270;GO:0046872	-	downregulated
	ENSBTAG00000046588	-1.15281	0.00857837	0.0284731	DNAJB9	DnaJ heat shock protein family (Hsp40) member B9 [Source:NCBI gene (formerly Entrezgene);Acc:614588]	GO:0005783;GO:0051787;GO:0030433	-	downregulated
	ENSBTAG00000012065	-1.1916	0.00863443	0.0286429	DNAJC3	DnaJ heat shock protein family (Hsp40) member C3 [Source:VGNC Symbol;Acc:VGNC:53813]	GO:0005737;GO:0005783;GO:0005788;GO:0005829;GO:0004860;GO:0005515;GO:0019901;GO:0051087;GO:0051787;GO:0006469;GO:0034975;GO:0034976;GO:0036494;GO:0043066;GO:0051603;GO:0070417;GO:1903912	K09523;K09523	downregulated
	ENSBTAG00000003362	-1.50749	0.0162253	0.048324	HSP90B1	heat shock protein 90 beta family member 1 [Source:VGNC Symbol;Acc:VGNC:49984]	GO:0005783;GO:0005788;GO:0005789;GO:0005829/;GO:0030496;GO:0032991;GO:0048471;GO:0003723;GO:0005524;GO:0019903;GO:0050750;GO:0051082;GO:0001666;GO:0006457;GO:0030433;GO:0030970;GO:0031247;GO:0043066;GO:0043666;GO:0071318	K09487;K09487;K09487;K09487;K09487;K09487;K09487;K09487;K09487	downregulated
hypothalamus	ENSBTAG00000006295	11.9873	4.50641e-06	0.00105746	TSHB	thyroid stimulating hormone subunit beta [Source:VGNC Symbol;Acc:VGNC:36418]	GO:0005576;GO:0005179;GO:0007165	K05251;K05251;K05251;K05251;K05251	upregulated
	ENSBTAG00000047599	5.57491	0.00030905	0.0238754	GHRHR	growth hormone releasing hormone receptor [Source:VGNC Symbol;Acc:VGNC:29350]	GO:0005637;GO:0005640;GO:0005737;GO:0005886;GO:0009986;GO:0016020;GO:0016021;GO:0016363;GO:0030141;GO:0004888;GO:0004930;GO:0008528;GO:0016520;GO:0017046;GO:0019838;GO:0007166;GO:0007186;GO:0007188;GO:0007189;GO:0007595;GO:0008284;GO:0008340;GO:0019933;GO:0021984t;GO:0030104;GO:003087;GO:0032868;GO:0032869;GO:0033143;GO:0040018;GO:0042445s;GO:0043567;GO:0043627;GO:0046887;GO:0048469;GO:0051246;GO…	K04584;K04584	upregulated
	ENSBTAG00000017802	1.46928	0.000685095	0.0388575	THRB	thyroid hormone receptor beta [Source:VGNC Symbol;Acc:VGNC:35847]	GO:0005634;GO:0016604;GO:0000978;GO:0001225;GO:0003677;GO:0003682;GO:0003700;GO:0004879;GO:0008270;GO:0019899;GO:0031490;GO:0043565;GO:0046872;GO:0070324;GO:1990837;GO:0000122;GO:0002154;GO:0006355;GO:0006357;GO:0007605;GO:0007621;GO:0008016;GO:0008050;GO:0009755;GO:0009887;GO:0030154;GO:0045892;GO:0045944;GO:0046549;GO:0060509;GO:0097067	K08362;K08362	upregulated
pituitary	ENSBTAG00000010889	12.2689	7.78057e-50	1.74688e-47	FSHB	follicle stimulating hormone subunit beta [Source:NCBI gene (formerly Entrezgene);Acc:281171]	GO:0016914;GO:0005179GO:0016913;GO:0001541;GO:0007179;GO:0007186;GO:0010469;GO:0010628;GO:0010893;GO:0042699;GO:0045670;GO:0045780;GO:0060011	K05250;K05250;K05250;K05250	upregulated
	ENSBTAG00000017220	12.0058	6.59125e-36	5.28055e-34	GH1	growth hormone 1 [Source:NCBI gene (formerly Entrezgene);Acc:280804]	GO:0005131;GO:0005179;GO:0008083;GO:0007165;GO:0008283;GO:0009306n;GO:0010629;GO:001080;GO:0010867;GO:0040018;GO:0042531;GO:0043066;GO:0045542;GO:0045717;GO:0045723;GO:0045927;GO:0046427;GO:0048513;GO:0050731;GO:0050996;GO:0060396;GO:0070294;GO:0071073;GO:1900482;GO:1901984;GO:1903489;GO:1903576;GO:2000253;GO:2000833;GO:2000844;GO:2000860	K05438;K05438;K05438;K05438;K05438	upregulated
	ENSBTAG00000047599	7.94224	3.08181e-34	2.18077e-32	GHRHR	growth hormone releasing hormone receptor [Source:VGNC Symbol;Acc:VGNC:29350]	GO:0004888;GO:0004930;GO:0008528;GO:0016520;GO:0017046;GO:0019838;GO:0007166;GO:0007186;GO:0007188;GO:0007189;GO:0007595;GO:0008284;GO:0008340;GO:0019933;GO:0021984t;GO:0030104;GO:0030879;GO:0032868;GO:0032869;GO:0033143;GO:0040018;GO:0042445;GO:0043567;GO:0043627;GO:0046887;GO:0048469;GO:0051246;GO:0051384;GO:0060124;GO:0060133	K04584;K04584	upregulated
	ENSBTAG00000006295	10.9931	3.83523e-32	2.32491e-30	TSHB	thyroid stimulating hormone subunit beta [Source:VGNC Symbol;Acc:VGNC:36418]	GO:0005576;GO:0005179;GO:0007165	K05251;K05251;K05251;K05251;K05251	upregulated
	ENSBTAG00000019997	5.25568	7.31398e-25	2.63913e-23	TRHR	thyrotropin releasing hormone receptor [Source:VGNC Symbol;Acc:VGNC:36306]	GO:0016021;GO:0004930;GO:0004997;GO:0007186	K04282;K04282	upregulated
	ENSBTAG00000000438	12.8244	7.47533e-18	1.40731e-16	GNRHR	gonadotropin releasing hormone receptor [Source:VGNC Symbol;Acc:VGNC:29482]	GO:0016021;GO:0004930;GO:0016500;GO:0007186	K04280;K04280	upregulated
	ENSBTAG00000017802	1.85504	6.84611e-14	8.40103e-13	THRB	thyroid hormone receptor beta [Source:VGNC Symbol;Acc:VGNC:35847]	GO:0043565;GO:0046872;GO:0070324;GO:1990837;GO:0000122;GO:0002154;GO:0006355;GO:0006357I;GO:0007605;GO:0007621;GO:0008016;;GO:0009755;GO:0009887;GO:0030154;GO:0045892;GO:0045944I;GO:0046549;GO:0060509;GO:0097067;GO:0097474	K08362;K08362	upregulated
	ENSBTAG00000047424	1.20612	1.08884e-11	1.0244e-10	TRIP10	thyroid hormone receptor interactor 10 [Source:NCBI gene (formerly Entrezgene);Acc:533171]	GO:0043231;GO:0005515;GO:0042802;gGO:0006897;GO:0007165;GO:0030036	K07196	upregulated
	ENSBTAG00000010874	5.00409	6.36227e-10	4.73616e-09	GHSR	growth hormone secretagogue receptor [Source:VGNC Symbol;Acc:VGNC:29352]	GO:0001616;GO:0004930;GO:0016520;GO:0007165;GO:0007186;GO:0008154;GO:0008343;GO:0009725;GO:0009755;GO:0030252;GO:0032094;GO:0032100;GO:0032691;GO:0032715;GO:0032720;GO:0032869;GO:0040018;GO:0043568;GO:0046697;GO:0050728;GO:0051963	K04284;K04284;K04284	upregulated
	ENSBTAG00000017489	5.77552	4.21894e-07	2.05754e-06	TSHR	thyroid stimulating hormone receptor [Source:VGNC Symbol;Acc:VGNC:36419]	GO:0004930;GO:0004996;GO:0008528;GO:0016500;GO:0007165;GO:0007186;GO:0007189;GO:0007190;GO:0008344;GO:0009755;GO:0030183;GO:0038194;GO:0040012;GO:0040018;GO:0060119;GO:0060122;GO:0071542;GO:0090103;GO:0120162	K04249;K04249;K04249;K04249;K04249	upregulated
	ENSBTAG00000005306	-4.36696	0.000589297	0.00165181	TRH	thyrotropin releasing hormone [Source:VGNC Symbol;Acc:VGNC:36304]	GO:0005179;GO:0008437;GO:0001692;GO:0009755;GO:0014050;GO:0014054;GO:0032024;GO:0042755	K05253	downregulated
	ENSBTAG00000020202	-4.26679	0.00127287	0.00330786	CRHBP	corticotropin releasing hormone binding protein [Source:VGNC Symbol;Acc:VGNC:27708]	GO:0006954;GO:0007565;GO:0009755;GO:0035865;GO:0045055;GO:0048149;GO:0051459;GO:0051460;GO:0071356;GO:0071391;GO:0071392;GO:0080135;GO:1900011	-	downregulated
	ENSBTAG00000003994	4.21987	1.32807e-32	8.41545e-31	IGFBP3	insulin like growth factor binding protein 3 [Source:VGNC Symbol;Acc:VGNC:30085]	GO:0001558;GO:0001649;GO:0010906;GO:0032868;GO:0040008;GO:0043410;GO:0043568;GO:0044342;GO:0050790	K10138;K10138;K10138;K10138	upregulated
	ENSBTAG00000013066	2.65925	1.93363e-22	5.54652e-21	IGF2	insulin like growth factor 2 [Source:VGNC Symbol;Acc:VGNC:30078]	GO:0005179;GO:0008083;GO:0001503;GO:0005975;GO:0006006;GO:0007165;GO:0032868	K13769;K13769;K13769;K13769;K13769;K13769	upregulated
	ENSBTAG00000054218	3.49706	5.33374e-19	1.12802e-17	IGFBP5	insulin like growth factor binding protein 5 [Source:NCBI gene (formerly Entrezgene);Acc:404185]	GO:0031994;GO:0001558;GO:0001649;GO:0017148;GO:0030336;;GO:0040008;GO:0042593;GO:0043568;GO:0043569;GO:0045668;GO:0045926;GO:0048286;GO:0048662;GO:0051897;GO:0060056;GO:0071320;GO:0071407;GO:1901862;GO:1904205;GO:1904707;GO:1904754	-	upregulated
	ENSBTAG00000008611	2.39047	3.06033e-15	4.35827e-14	IGFBP4	insulin like growth factor binding protein 4 [Source:VGNC Symbol;Acc:VGNC:30086]	GO:0005520;GO:0019838;GO:0001558;GO:0010906;GO:0040008;GO:0043410;GO:0043568;GO:0044342	-	upregulated
	ENSBTAG00000021467	2.01592	1.24909e-10	1.0182e-09	IGFBP6	insulin like growth factor binding protein 6 [Source:VGNC Symbol;Acc:VGNC:30088]	GO:0042568;GO:0001968;GO:0005520;GO:0019838;GO:0031994;GO:0031995;GO:0042802;GO:0000187;GO:0016477;GO:0043567	-	upregulated
	ENSBTAG00000019368	1.59703	1.44924e-05	5.47483e-05	IGFBP7	insulin like growth factor binding protein 7 [Source:VGNC Symbol;Acc:VGNC:30089]	GO:0005520;GO:0001558;GO:0007155;GO:0009966	-	upregulated
	ENSBTAG00000011082	1.01643	0.00332603	0.00797667	IGF1	insulin like growth factor 1 [Source:VGNC Symbol;Acc:VGNC:30076]	GO:0035867;GO:0042567;GO:0005158;GO:0005159;GO:0005178;GO:0005179;GO:0008083;GO:0000187;GO:0001775;GO:0007165;GO:0008283;GO:0008284;GO:0009408;GO:0010468;GO:0010560;GO:0010613;GO:0010628;GO:0010629;GO:0014065;GO:0014068;GO:0014834;GO:0030166;GO:0032148;GO:0032691;GO:0032868;GO:0042060;GO:0042104;GO:0042531;GO:0042538;GO:0043066;GO:0043388;GO:0043410;GO:0043491;GO:0043568;GO:0045725;GO:0045821;GO:…	K05459;K05459;K05459;K05459;K05459;K05459;K05459;K05459;K05459;K05459;K05459;K05459;K05459;K05459;K05459;K05459;K05459;K05459;K05459;K05459;K05459;K05459;K05459;K05459;K05459;K05459;K05459;K05459;K05459;K05459;K05459	upregulated
mammary gland	ENSBTAG00000015274	7.0602	3.91218e-66	6.87565e-62	PRL	prolactin [Source:NCBI gene (formerly Entrezgene);Acc:280901]	GO:0005576;GO:0005179;GO:0007165	K05439;K05439;K05439;K05439;K05439	upregulated
	ENSBTAG00000025035	-1.1769	0.000393059	0.00205964	PRLR	prolactin receptor [Source:VGNC Symbol;Acc:VGNC:33346]	GO:0043235GO:0004896;GO:0004923;GO:0004924;GO:0004925;GO:0005127;GO:0005515;GO:0017046;GO:0019955;GO:0046872;GO:0007171;GO:0008284;GO:0019221;GO:0038161;GO:0038165;GO:0042976;GO:0043066;GO:0048861	K05081;K05081;K05081;K05081;K05081	downregulated
	ENSBTAG00000017220	6.36166	7.35481e-53	3.23152e-49	GH1	growth hormone 1 [Source:NCBI gene (formerly Entrezgene);Acc:280804]	GO:0005131;GO:0005179;GO:0008083;GO:0007165;GO:0008283;GO:0009306n;GO:0010629;GO:0010800;GO:0010867;GO:0030073;GO:0031667;GO:0032094;GO:0032869;GO:0035811;GO:0040018;GO:0042531;GO:0043066;GO:0045542;GO:0045717;GO:0045723;GO:0045927;GO:0046427;GO:0048513;GO:0050731;GO:0050996;GO:0060396;GO:0070294;GO:0071073;GO:1900482;GO:1901984;GO:1903489;GO:1903576;GO:2000253;GO:2000833;GO:200084;GO:2000860	K05438;K05438;K05438;K05438;K05438	upregulated
	ENSBTAG00000001335	-1.26492	0.000286392	0.00155879	GHR	growth hormone receptor [Source:VGNC Symbol;Acc:VGNC:50184]	GO:0043235;GO:0070195;GO:0004896;GO:0005515;GO:0017046;GO:0042802;GO:0042803;GO:0006897;GO:0019221;GO:0032870s;GO:0040018;GO:0042445;GO:0048009;GO:0060396	K05080;K05080;K05080;K05080;K05080	downregulated
	ENSBTAG00000016573	-2.14756	0.000466027	0.00238997	LHCGR	luteinizing hormone/choriogonadotropin receptor [Source:NCBI gene (formerly Entrezgene);Acc:281900]	GO:0004930;GO:0004964;GO:0008528;GO:0016500;GO:0035472;GO:0038106;GO:0001541;GO:0007165;GO:0007186;GO:0007189;GO:0007190;GO:0007200;GO:0007283;GO:0008585;GO:0009755;GO:0022602;GO:0032962;GO:0042700;GO:0046544;GO:0060065;GO:0071371;GO:0072520;GO:0090030	K04248;K04248;K04248;K04248;K04248	downregulated
	ENSBTAG00000010889	6.54432	0.0124631	0.0389402	FSHB	follicle stimulating hormone subunit beta [Source:NCBI gene (formerly Entrezgene);Acc:281171]	GO:0016914;GO:0005179;GO:0016913;GO:0001541;GO:0007179;GO:0007186;GO:0010469;GO:0010628;GO:0010893;GO:0042699;GO:0045670;GO:0045780;GO:0060011	K05250;K05250;K05250;K05250	upregulated
	ENSBTAG00000011082	-1.24938	0.00601825	0.0211503	IGF1	insulin like growth factor 1 [Source:VGNC Symbol;Acc:VGNC:30076]	GO:0035867;GO:0042567;GO:0003674;GO:0005158;GO:0005159;GO:0005179;GO:0008083;GO:0000187;GO:0001775;GO:0007165;GO:0008283;GO:0008284;GO:0009408;GO:0010468;GO:0010560;GO:0010613;GO:0010628;GO:0010629;GO:0014065;GO:0014068;GO:0014834;GO:0014896;GO:0014904;GO:0014911;GO:0030166;GO:0030335;GO:0032094;GO:0032148;GO:0032691;GO:0032720;GO:0032868;GO:0034392;GO:0035630;GO:0040014;GO:0042060;GO:0042104;GO:…	K05459;K05459;K05459;K05459;K05459;K05459;K05459;K05459;K05459;K05459;K05459;K05459;K05459;K05459;K05459;K05459;K05459;K05459;K05459;K05459;K05459;K05459;K05459;K05459;K05459;K05459;K05459;K05459;K05459;K05459;K05459	downregulated
	ENSBTAG00000046768	-3.22239	0.00601836	0.0211503	IGFBP1	insulin like growth factor binding protein 1 [Source:VGNC Symbol;Acc:VGNC:30083]	GO:0005520;GO:0031994;GO:0031995	-	downregulated
mammary gland	ENSBTAG00000033457	-2.20031	7.72204e-23	1.21174e-20	CCAR1	cell division cycle and apoptosis regulator 1 [Source:NCBI gene (formerly Entrezgene);Acc:767587]	GO:0000978;GO:0003713;GO:0003714;GO:0030374;GO:0006355;GO:0007049;GO:0008284;GO:0030335;GO:0043065	-	downregulated
	ENSBTAG00000019302	-1.17631	1.11705e-05	9.26047e-05	BCL2	BCL2 apoptosis regulator [Source:VGNC Symbol;Acc:VGNC:26445]	GO:0001656;GO:0001657;GO:0001658;GO:0001836;GO:0002360;GO:0006470;GO:0006582;GO:0006808;GO:0006874;GO:0006915;GO:0006974;GO:0006979;GO:0007569;GO:0008283;GO:0008284;GO:0008285;GO:0008584;GO:0008625;GO:0008630;GO:0008631;GO:0008637;GO:0009636;;GO:0010468;GO:0010506;GO:0010507;GO:0010523;GO:0010559;GO:0014031;GO:0022898;GO:0030307;GO:0030308;GO:0032469;GO:0071456;GO:0072593;GO:2000134;GO:2000378;GO…	K02161;K02161;K02161;K02161;K02161;K02161;K02161;K02161;K02161;K02161;K02161;K02161;K02161;K02161;K02161;K02161;K02161;K02161;K02161;K02161;K02161;K02161;K02161;K02161;K02161;K02161;K02161;K02161;K02161;K02161;K02161;K02161;K02161;K02161;K02161;K02161;K02161;K02161;K02161	downregulated
	ENSBTAG00000001223	-1.28328	0.000391949	0.00205566	CAAP1	caspase activity and apoptosis inhibitor 1 [Source:VGNC Symbol;Acc:VGNC:26660]	GO:0042981;GO:2001268	-	downregulated
	ENSBTAG00000001165	-1.23185	0.00121712	0.0054168	AIFM2	apoptosis inducing factor mitochondria associated 2 [Source:VGNC Symbol;Acc:VGNC:25762]	GO:0031966;GO:0004174;GO:0016491/;GO:0016655;GO:0006743;GO:0008637;GO:0043065;GO:0055114;GO:0110076;GO:1900407	K22745	downregulated
	ENSBTAG00000011636	-1.74284	0.0126187	0.0393634	DDIAS	DNA damage induced apoptosis suppressor [Source:VGNC Symbol;Acc:VGNC:27946]	GO:0071850;GO:0097752;GO:1902230	-	downregulated

## Sheet: TableS4
Table S4. The ceRNA regulatory network in the hypothalamus of dairy cows under HS
ncRNA_ID	ncRNA_source_gene	mRNA_ID	corr	miRNA_NUM(ncRNA)	miRNA_NUM(mRNA)	miRNA_NUM(both)(116)	miRNA_ID(both)	hyper.test.p	Symbol	Description	KEGG_A_class	KEGG_B_class	Pathway	K_ID	GO Component	GO Function	GO Process
novel_circ_000112	ENSBTAG00000030259	ENSBTAG00000017866	0.942201	1	5	1	bta-miR-200c	0.0431035	CD36	CD36 molecule [Source:NCBI gene (formerly Entrezgene);Acc:281052]	Cellular Processes;Organismal Systems;Environmental Information Processing;Human Diseases;Human Diseases;Environmental Information Processing;Organismal Systems;Organismal Systems;Organismal Systems;Organismal Systems	Transport and catabolism;Immune system;Signal transduction;Infectious diseases;Endocrine and metabolic diseases;Signaling molecules and interaction;Endocrine system;Endocrine system;Digestive system;Digestive system	ko04145//Phagosome;ko04640//Hematopoietic cell lineage;ko04152//AMPK signaling pathway;ko05144//Malaria;ko04931//Insulin resistance;ko04512//ECM-receptor interaction;ko03320//PPAR signaling pathway;ko04920//Adipocytokine signaling pathway;ko04979//Cholesterol metabolism;ko04975//Fat digestion and absorption	K06259;K06259;K06259;K06259;K06259;K06259;K06259;K06259;K06259;K06259	GO:0005794//Golgi apparatus;GO:0005886//plasma membrane;GO:0016020//membrane;GO:0016021//integral component of membrane;GO:0016324//apical plasma membrane	-	GO:0006955//immune response;GO:0007155//cell adhesion;GO:0007166//cell surface receptor signaling pathway
novel_circ_000126	ENSBTAG00000000719	ENSBTAG00000002640	0.962756	25	2	2	bta-miR-211|miR-211-x	0.0449775	KALRN	kalirin RhoGEF kinase [Source:VGNC Symbol;Acc:VGNC:30389]	-	-	-	-	-	GO:0000166//nucleotide binding;GO:0005085//guanyl-nucleotide exchange factor activity;GO:0005515//protein binding	GO:0007411//axon guidance;GO:0007417//central nervous system development;GO:0050790//regulation of catalytic activity
novel_circ_000126	ENSBTAG00000000719	ENSBTAG00000002997	0.91744	25	4	3	bta-miR-218|miR-218-x|miR-218-z	0.0309975	ADAMTSL1	ADAMTS like 1 [Source:VGNC Symbol;Acc:VGNC:58359]	-	-	-	-	GO:0031012//extracellular matrix	GO:0004222//metalloendopeptidase activity	GO:0006508//proteolysis;GO:0030198//extracellular matrix organization
novel_circ_000126	ENSBTAG00000000719	ENSBTAG00000003574	0.967266	25	4	3	bta-miR-211|miR-211-x|miR-3535-z	0.0309975	SHISAL1	shisa like 1 [Source:VGNC Symbol;Acc:VGNC:30574]	-	-	-	-	GO:0016020//membrane;GO:0016021//integral component of membrane	-	-
novel_circ_000126	ENSBTAG00000000719	ENSBTAG00000003827	0.97686	25	7	5	bta-miR-135b|bta-miR-211|bta-miR-302a|miR-211-x|miR-382-x	0.00502202	RIMS2	regulating synaptic membrane exocytosis 2 [Source:VGNC Symbol;Acc:VGNC:33972]	Organismal Systems	Endocrine system	ko04911//Insulin secretion	K15297	GO:0016020//membrane	GO:0031267//small GTPase binding	GO:0006887//exocytosis
novel_circ_000126	ENSBTAG00000000719	ENSBTAG00000004305	0.952092	25	4	3	bta-miR-455-5p|miR-652-x|miR-8549-z	0.0309975	RGS16	regulator of G protein signaling 16 [Source:VGNC Symbol;Acc:VGNC:33915]	-	-	-	-	GO:0005737//cytoplasm;GO:0016020//membrane;GO:0031224//intrinsic component of membrane	GO:0005096//GTPase activator activity	GO:0007186//G protein-coupled receptor signaling pathway;GO:0009968//negative regulation of signal transduction;GO:0043547//positive regulation of GTPase activity
novel_circ_000126	ENSBTAG00000000719	ENSBTAG00000005012	0.964845	25	2	2	bta-miR-211|miR-211-x	0.0449775	HSPH1	heat shock protein family H (Hsp110) member 1 [Source:VGNC Symbol;Acc:VGNC:53817]	Genetic Information Processing	Folding, sorting and degradation	ko04141//Protein processing in endoplasmic reticulum	K09485	GO:0005654//nucleoplasm;GO:0005737//cytoplasm;GO:0005829//cytosol;GO:0005874//microtubule;GO:0032991//protein-containing complex	GO:0000774//adenyl-nucleotide exchange factor activity;GO:0043014//alpha-tubulin binding	GO:0051085//chaperone cofactor-dependent protein refolding
novel_circ_000126	ENSBTAG00000000719	ENSBTAG00000005104	0.956858	25	3	3	bta-miR-218|miR-218-x|miR-34-x	0.00907441	MGAT5B	alpha-1,6-mannosylglycoprotein 6-beta-N-acetylglucosaminyltransferase B [Source:VGNC Symbol;Acc:VGNC:55847]	Metabolism;Metabolism;Metabolism	Global and overview maps;Glycan biosynthesis and metabolism;Glycan biosynthesis and metabolism	ko01100//Metabolic pathways;ko00510//N-Glycan biosynthesis;ko00515//Mannose type O-glycan biosyntheis	K09661;K09661;K09661	GO:0000139//Golgi membrane;GO:0005794//Golgi apparatus;GO:0016020//membrane;GO:0016021//integral component of membrane	GO:0016740//transferase activity;GO:0016757//transferase activity, transferring glycosyl groups;GO:0030144//alpha-1,6-mannosylglycoprotein 6-beta-N-acetylglucosaminyltransferase activity;GO:0030145//manganese ion binding	GO:0006486//protein glycosylation;GO:0006487//protein N-linked glycosylation;GO:0018215//protein phosphopantetheinylation;GO:0018242//protein O-linked glycosylation via serine
novel_circ_000126	ENSBTAG00000000719	ENSBTAG00000007703	0.913806	25	4	4	bta-miR-218|bta-miR-302b|miR-218-x|miR-382-x	0.0017667	NMT2	N-myristoyltransferase 2 [Source:VGNC Symbol;Acc:VGNC:32138]	-	-	-	-	GO:0005737//cytoplasm;GO:0005794//Golgi apparatus;GO:0005829//cytosol;GO:0005886//plasma membrane;GO:0019898//extrinsic component of membrane	GO:0004379//glycylpeptide N-tetradecanoyltransferase activity;GO:0016740//transferase activity;GO:0016746//transferase activity, transferring acyl groups	GO:0006499//N-terminal protein myristoylation;GO:0018008//N-terminal peptidyl-glycine N-myristoylation
novel_circ_000126	ENSBTAG00000000719	ENSBTAG00000008921	0.945361	25	2	2	bta-miR-135b|miR-3535-z	0.0449775	NEXN	nexilin F-actin binding protein [Source:VGNC Symbol;Acc:VGNC:32025]	-	-	-	-	GO:0005886//plasma membrane;GO:0015629//actin cytoskeleton;GO:0030424//axon	GO:0005515//protein binding;GO:0008307//structural constituent of muscle;GO:0051015//actin filament binding;GO:0098632//cell-cell adhesion mediator activity	GO:0007155//cell adhesion;GO:0007156//homophilic cell adhesion via plasma membrane adhesion molecules;GO:0007411//axon guidance;GO:0030334//regulation of cell migration;GO:0051493//regulation of cytoskeleton organization;GO:0070593//dendrite self-avoidance
novel_circ_000126	ENSBTAG00000000719	ENSBTAG00000009338	0.976749	25	4	4	bta-miR-218|miR-218-x|miR-218-z|miR-34-x	0.0017667	LRRC7	leucine rich repeat containing 7 [Source:VGNC Symbol;Acc:VGNC:55251]	-	-	-	-	-	GO:0005515//protein binding	-
novel_circ_000126	ENSBTAG00000000719	ENSBTAG00000011381	0.98195	25	2	2	miR-106-x|miR-34-x	0.0449775	SLC30A3	solute carrier family 30 member 3 [Source:VGNC Symbol;Acc:VGNC:34808]	-	-	-	-	GO:0005737//cytoplasm;GO:0005770//late endosome;GO:0008021//synaptic vesicle;GO:0016021//integral component of membrane;GO:0030285//integral component of synaptic vesicle membrane;GO:0030672//synaptic vesicle membrane;GO:0043005//neuron projection;GO:0097457//hippocampal mossy fiber;GO:0098686//hippocampal mossy fiber to CA3 synapse;GO:0098978//glutamatergic synapse	GO:0008324//cation transmembrane transporter activity	GO:0006812//cation transport;GO:0051050//positive regulation of transport;GO:0055085//transmembrane transport;GO:0061088//regulation of sequestering of zinc ion;GO:0099180//zinc ion import into synaptic vesicle
novel_circ_000126	ENSBTAG00000000719	ENSBTAG00000012630	0.928607	25	2	2	miR-34-x|miR-652-x	0.0449775	PAMR1	peptidase domain containing associated with muscle reration 1 [Source:VGNC Symbol;Acc:VGNC:32562]	-	-	-	-	-	GO:0004252//serine-type endopeptidase activity;GO:0005509//calcium ion binding	GO:0006508//proteolysis
novel_circ_000126	ENSBTAG00000000719	ENSBTAG00000013689	0.956218	25	2	2	bta-miR-455-5p|miR-106-x	0.0449775	MCTP2	multiple C2 and transmembrane domain containing 2 [Source:VGNC Symbol;Acc:VGNC:31324]	-	-	-	-	GO:0005654//nucleoplasm;GO:0005829//cytosol;GO:0016020//membrane;GO:0016021//integral component of membrane;GO:0030672//synaptic vesicle membrane	GO:0005509//calcium ion binding	GO:0046928//regulation of neurotransmitter secretion
novel_circ_000126	ENSBTAG00000000719	ENSBTAG00000014194	0.925419	25	11	9	bta-miR-135b|bta-miR-218|bta-miR-302b|miR-101-x|miR-211-x|miR-218-x|miR-218-z|miR-34-x|miR-382-x	1.1027e-05	ADARB2	adenosine deaminase RNA specific B2 (inactive) [Source:NCBI gene (formerly Entrezgene);Acc:524061]	-	-	-	-	GO:0005730//nucleolus;GO:0005737//cytoplasm	GO:0003723//RNA binding;GO:0003725//double-stranded RNA binding;GO:0003726//double-stranded RNA adenosine deaminase activity;GO:0004000//adenosine deaminase activity;GO:0008251//tRNA-specific adenosine deaminase activity	GO:0006382//adenosine to inosine editing;GO:0006396//RNA processing
novel_circ_000126	ENSBTAG00000000719	ENSBTAG00000014384	0.945818	25	3	3	bta-miR-455-3p|miR-382-x|miR-652-x	0.00907441	ZDHHC22	zinc finger DHHC-type palmitoyltransferase 22 [Source:VGNC Symbol;Acc:VGNC:37138]	-	-	-	-	GO:0005783//endoplasmic reticulum;GO:0005794//Golgi apparatus;GO:0005886//plasma membrane;GO:0016020//membrane;GO:0016021//integral component of membrane	GO:0016409//palmitoyltransferase activity;GO:0016740//transferase activity;GO:0016746//transferase activity, transferring acyl groups;GO:0019706//protein-cysteine S-palmitoyltransferase activity	GO:0006612//protein targeting to membrane;GO:0018215//protein phosphopantetheinylation;GO:0018230//peptidyl-L-cysteine S-palmitoylation;GO:0018345//protein palmitoylation;GO:0072659//protein localization to plasma membrane
novel_circ_000126	ENSBTAG00000000719	ENSBTAG00000014530	0.953965	25	2	2	bta-miR-135b|bta-miR-144	0.0449775	NTNG1	netrin G1 [Source:VGNC Symbol;Acc:VGNC:50086]	Environmental Information Processing;Organismal Systems	Signaling molecules and interaction;Development	ko04514//Cell adhesion molecules (CAMs);ko04360//Axon guidance	K07522;K07522	GO:0005886//plasma membrane;GO:0043256//laminin complex	GO:0050839//cell adhesion molecule binding;GO:0098632//cell-cell adhesion mediator activity	GO:0009887//animal organ morphogenesis;GO:0009888//tissue development;GO:0016477//cell migration;GO:0034446//substrate adhesion-dependent cell spreading;GO:0070831//basement membrane assembly;GO:0099560//synaptic membrane adhesion
novel_circ_000126	ENSBTAG00000000719	ENSBTAG00000016058	0.92948	25	2	2	bta-miR-144|miR-3535-z	0.0449775	FAM83B	family with sequence similarity 83 member B [Source:VGNC Symbol;Acc:VGNC:28833]	-	-	-	-	GO:0005737//cytoplasm;GO:0016020//membrane	GO:0005154//epidermal growth factor receptor binding;GO:0019901//protein kinase binding;GO:0036312//phosphatidylinositol 3-kinase regulatory subunit binding;GO:0036313//phosphatidylinositol 3-kinase catalytic subunit binding	GO:0007165//signal transduction;GO:0007173//epidermal growth factor receptor signaling pathway;GO:0008283//cell proliferation
novel_circ_000126	ENSBTAG00000000719	ENSBTAG00000017420	0.935715	25	3	3	bta-miR-218|miR-218-x|miR-218-z	0.00907441	ZMAT4	zinc finger matrin-type 4 [Source:VGNC Symbol;Acc:VGNC:37193]	-	-	-	-	-	GO:0003676//nucleic acid binding;GO:0008270//zinc ion binding	-
novel_circ_000126	ENSBTAG00000000719	ENSBTAG00000017549	0.914165	25	2	2	miR-211-x|miR-652-x	0.0449775	KITLG	KIT ligand [Source:VGNC Symbol;Acc:VGNC:30619]	Human Diseases;Environmental Information Processing;Environmental Information Processing;Environmental Information Processing;Environmental Information Processing;Environmental Information Processing;Organismal Systems;Organismal Systems	Cancers;Signal transduction;Signal transduction;Signal transduction;Signal transduction;Signal transduction;Immune system;Endocrine system	ko05200//Pathways in cancer;ko04151//PI3K-Akt signaling pathway;ko04014//Ras signaling pathway;ko04010//MAPK signaling pathway;ko04015//Rap1 signaling pathway;ko04072//Phospholipase D signaling pathway;ko04640//Hematopoietic cell lineage;ko04916//Melanogenesis	K05461;K05461;K05461;K05461;K05461;K05461;K05461;K05461	GO:0005576//extracellular region;GO:0005615//extracellular space;GO:0005737//cytoplasm;GO:0005886//plasma membrane;GO:0016020//membrane;GO:0016021//integral component of membrane;GO:0030027//lamellipodium;GO:0030175//filopodium	GO:0005125//cytokine activity;GO:0005173//stem cell factor receptor binding;GO:0008083//growth factor activity	GO:0001755//neural crest cell migration;GO:0002687//positive regulation of leukocyte migration;GO:0002763//positive regulation of myeloid leukocyte differentiation;GO:0007155//cell adhesion;GO:0007165//signal transduction;GO:0008284//positive regulation of cell proliferation;GO:0008584//male gonad development;GO:0033026//negative regulation of mast cell apoptotic process;GO:0035162//embryonic hem…
novel_circ_000126	ENSBTAG00000000719	ENSBTAG00000017802	0.985106	25	4	4	bta-miR-135b|bta-miR-211|miR-211-x|miR-2312-z	0.0017667	THRB	thyroid hormone receptor beta [Source:VGNC Symbol;Acc:VGNC:35847]	Environmental Information Processing;Organismal Systems	Signaling molecules and interaction;Endocrine system	ko04080//Neuroactive ligand-receptor interaction;ko04919//Thyroid hormone signaling pathway	K08362;K08362	GO:0005634//nucleus;GO:0016604//nuclear body	GO:0000978//RNA polymerase II proximal promoter sequence-specific DNA binding;GO:0001225//RNA polymerase II transcription coactivator binding;GO:0003677//DNA binding;GO:0003682//chromatin binding;GO:0003700//DNA-binding transcription factor activity;GO:0004879//nuclear receptor activity;GO:0008270//zinc ion binding;GO:0019899//enzyme binding;GO:0031490//chromatin DNA binding;GO:0043565//sequence-…	GO:0000122//negative regulation of transcription by RNA polymerase II;GO:0002154//thyroid hormone mediated signaling pathway;GO:0006355//regulation of transcription, DNA-templated;GO:0006357//regulation of transcription by RNA polymerase II;GO:0007605//sensory perception of sound;GO:0007621//negative regulation of female receptivity;GO:0008016//regulation of heart contraction;GO:0008050//female c…
novel_circ_000126	ENSBTAG00000000719	ENSBTAG00000018841	0.969685	25	2	2	bta-miR-144|miR-652-x	0.0449775	PTPN3	protein tyrosine phosphatase non-receptor type 3 [Source:VGNC Symbol;Acc:VGNC:33538]	-	-	-	-	GO:0005737//cytoplasm;GO:0005856//cytoskeleton;GO:0009898//cytoplasmic side of plasma membrane	GO:0001784//phosphotyrosine residue binding;GO:0004721//phosphoprotein phosphatase activity;GO:0004725//protein tyrosine phosphatase activity;GO:0005515//protein binding;GO:0008092//cytoskeletal protein binding;GO:0016787//hydrolase activity;GO:0016791//phosphatase activity;GO:0017080//sodium channel regulator activity;GO:0051117//ATPase binding	GO:0006470//protein dephosphorylation;GO:0016311//dephosphorylation;GO:0035335//peptidyl-tyrosine dephosphorylation;GO:0045930//negative regulation of mitotic cell cycle;GO:0051045//negative regulation of membrane protein ectodomain proteolysis;GO:0098902//regulation of membrane depolarization during action potential;GO:2000649//regulation of sodium ion transmembrane transporter activity
novel_circ_000126	ENSBTAG00000000719	ENSBTAG00000019008	0.924981	25	5	4	bta-miR-135b|bta-miR-211|miR-1296-x|miR-211-x	0.00750847	FBXL16	F-box and leucine rich repeat protein 16 [Source:VGNC Symbol;Acc:VGNC:52773]	-	-	-	-	GO:0019005//SCF ubiquitin ligase complex	GO:0005515//protein binding	GO:0031146//SCF-dependent proteasomal ubiquitin-dependent protein catabolic process
novel_circ_000126	ENSBTAG00000000719	ENSBTAG00000019497	0.952908	25	4	3	bta-miR-302b|bta-miR-455-3p|miR-2312-z	0.0309975	ILDR2	immunoglobulin like domain containing receptor 2 [Source:VGNC Symbol;Acc:VGNC:30174]	-	-	-	-	GO:0016020//membrane;GO:0016021//integral component of membrane	-	GO:0009749//response to glucose;GO:0030073//insulin secretion;GO:0030154//cell differentiation;GO:0031016//pancreas development;GO:0048873//homeostasis of number of cells within a tissue
novel_circ_000126	ENSBTAG00000000719	ENSBTAG00000020087	0.942818	25	7	6	bta-miR-135b|bta-miR-144|bta-miR-455-5p|miR-101-x|miR-2312-z|miR-3535-z	0.000355944	CAMK2A	calcium/calmodulin dependent protein kinase II alpha [Source:VGNC Symbol;Acc:VGNC:26721]	Organismal Systems;Human Diseases;Environmental Information Processing;Environmental Information Processing;Human Diseases;Human Diseases;Cellular Processes;Organismal Systems;Environmental Information Processing;Human Diseases;Organismal Systems;Organismal Systems;Organismal Systems;Cellular Processes;Organismal Systems;Environmental Information Processing;Organismal Systems;Organismal Systems;O…	Sensory system;Cancers;Signal transduction;Signal transduction;Cancers;Infectious diseases;Cell growth and death;Development;Signal transduction;Endocrine and metabolic diseases;Circulatory system;Endocrine system;Nervous system;Cell growth and death;Nervous system;Signal transduction;Nervous system;Sensory system;Endocrine system;Environmental adaptation;Endocrine system;Endocrine system;Endocri…	ko04740//Olfactory transduction;ko05200//Pathways in cancer;ko04020//Calcium signaling pathway;ko04024//cAMP signaling pathway;ko05205//Proteoglycans in cancer;ko05152//Tuberculosis;ko04217//Necroptosis;ko04360//Axon guidance;ko04310//Wnt signaling pathway;ko04934//Cushing syndrome;ko04261//Adrenergic signaling in cardiomyocytes;ko04921//Oxytocin signaling pathway;ko04728//Dopaminergic synapse;ko…	K04515;K04515;K04515;K04515;K04515;K04515;K04515;K04515;K04515;K04515;K04515;K04515;K04515;K04515;K04515;K04515;K04515;K04515;K04515;K04515;K04515;K04515;K04515;K04515;K04515;K04515;K04515;K04515;K04515	GO:0005737//cytoplasm;GO:0005954//calcium- and calmodulin-dependent protein kinase complex;GO:0043005//neuron projection;GO:0043197//dendritic spine	GO:0000166//nucleotide binding;GO:0004672//protein kinase activity;GO:0004674//protein serine/threonine kinase activity;GO:0004683//calmodulin-dependent protein kinase activity;GO:0005516//calmodulin binding;GO:0005524//ATP binding;GO:0009931//calcium-dependent protein serine/threonine kinase activity;GO:0016301//kinase activity;GO:0042802//identical protein binding;GO:0042803//protein homodimeri…	GO:0006468//protein phosphorylation;GO:0016310//phosphorylation;GO:0038166//angiotensin-activated signaling pathway;GO:0051092//positive regulation of NF-kappaB transcription factor activity;GO:0060996//dendritic spine development;GO:1990443//peptidyl-threonine autophosphorylation;GO:2001222//regulation of neuron migration
novel_circ_000126	ENSBTAG00000000719	ENSBTAG00000020318	0.912174	25	5	4	bta-miR-218|miR-211-x|miR-218-x|miR-34-x	0.00750847	DBNDD1	dysbindin domain containing 1 [Source:VGNC Symbol;Acc:VGNC:27891]	-	-	-	-	GO:0005737//cytoplasm	-	-
novel_circ_000126	ENSBTAG00000000719	ENSBTAG00000021574	0.946305	25	4	4	bta-miR-135b|bta-miR-455-3p|miR-2312-z|miR-382-x	0.0017667	TCF7L2	transcription factor 7 like 2 [Source:VGNC Symbol;Acc:VGNC:55976]	Human Diseases;Human Diseases;Human Diseases;Human Diseases;Environmental Information Processing;Environmental Information Processing;Human Diseases;Human Diseases;Human Diseases;Organismal Systems;Human Diseases;Human Diseases;Human Diseases;Cellular Processes;Human Diseases;Human Diseases;Human Diseases;Human Diseases	Cancers;Infectious diseases;Infectious diseases;Cancers;Signal transduction;Signal transduction;Endocrine and metabolic diseases;Cancers;Cancers;Endocrine system;Cancers;Cancers;Cardiovascular diseases;Cellular community - eukaryotes;Cancers;Cancers;Cancers;Cancers	ko05200//Pathways in cancer;ko05165//Human papillomavirus infection;ko05132//Salmonella infection;ko05225//Hepatocellular carcinoma;ko04310//Wnt signaling pathway;ko04390//Hippo signaling pathway;ko04934//Cushing syndrome;ko05226//Gastric cancer;ko05224//Breast cancer;ko04916//Melanogenesis;ko05215//Prostate cancer;ko05210//Colorectal cancer;ko05412//Arrhythmogenic right ventricular cardiomyopath…	K04491;K04491;K04491;K04491;K04491;K04491;K04491;K04491;K04491;K04491;K04491;K04491;K04491;K04491;K04491;K04491;K04491;K04491	GO:0000785//chromatin;GO:0005634//nucleus;GO:0005654//nucleoplasm;GO:0032993//protein-DNA complex;GO:0070369//beta-catenin-TCF7L2 complex;GO:0071664//catenin-TCF7L2 complex;GO:1990907//beta-catenin-TCF complex	GO:0000976//transcription regulatory region sequence-specific DNA binding;GO:0000978//RNA polymerase II proximal promoter sequence-specific DNA binding;GO:0000981//DNA-binding transcription factor activity, RNA polymerase II-specific;GO:0001103//RNA polymerase II repressing transcription factor binding;GO:0003677//DNA binding;GO:0003700//DNA-binding transcription factor activity;GO:0008013//beta-…	GO:0000122//negative regulation of transcription by RNA polymerase II;GO:0001568//blood vessel development;GO:0006357//regulation of transcription by RNA polymerase II;GO:0007050//cell cycle arrest;GO:0010909//positive regulation of heparan sulfate proteoglycan biosynthetic process;GO:0016055//Wnt signaling pathway;GO:0032024//positive regulation of insulin secretion;GO:0032092//positive regulati…
novel_circ_000126	ENSBTAG00000000719	ENSBTAG00000038700	0.92108	25	3	3	bta-miR-144|bta-miR-218|miR-218-x	0.00907441	FAM124B	family with sequence similarity 124 member B [Source:VGNC Symbol;Acc:VGNC:56107]	-	-	-	-	GO:0005654//nucleoplasm;GO:0005739//mitochondrion	-	-
novel_circ_000126	ENSBTAG00000000719	ENSBTAG00000045633	0.946453	25	2	2	bta-miR-455-3p|miR-34-x	0.0449775	AGTR1	angiotensin II receptor type 1 [Source:VGNC Symbol;Acc:VGNC:25745]	Human Diseases;Environmental Information Processing;Environmental Information Processing;Environmental Information Processing;Environmental Information Processing;Human Diseases;Organismal Systems;Environmental Information Processing;Organismal Systems;Human Diseases;Organismal Systems;Organismal Systems;Organismal Systems;Organismal Systems	Cancers;Signaling molecules and interaction;Signal transduction;Signal transduction;Signal transduction;Endocrine and metabolic diseases;Circulatory system;Signal transduction;Circulatory system;Endocrine and metabolic diseases;Endocrine system;Endocrine system;Endocrine system;Endocrine system	ko05200//Pathways in cancer;ko04080//Neuroactive ligand-receptor interaction;ko04020//Calcium signaling pathway;ko04022//cGMP - PKG signaling pathway;ko04072//Phospholipase D signaling pathway;ko04934//Cushing syndrome;ko04261//Adrenergic signaling in cardiomyocytes;ko04371//Apelin signaling pathway;ko04270//Vascular smooth muscle contraction;ko04933//AGE-RAGE signaling pathway in diabetic compli…	K04166;K04166;K04166;K04166;K04166;K04166;K04166;K04166;K04166;K04166;K04166;K04166;K04166;K04166	GO:0005886//plasma membrane;GO:0016021//integral component of membrane	GO:0001596//angiotensin type I receptor activity;GO:0004930//G protein-coupled receptor activity;GO:0004945//angiotensin type II receptor activity;GO:0031711//bradykinin receptor binding;GO:0046982//protein heterodimerization activity	GO:0001822//kidney development;GO:0007186//G protein-coupled receptor signaling pathway;GO:0007204//positive regulation of cytosolic calcium ion concentration;GO:0007266//Rho protein signal transduction;GO:0010873//positive regulation of cholesterol esterification;GO:0019229//regulation of vasoconstriction;GO:0019722//calcium-mediated signaling;GO:0032270//positive regulation of cellular protein …
novel_circ_000126	ENSBTAG00000000719	ENSBTAG00000049058	0.981218	25	8	7	bta-miR-211|bta-miR-218|bta-miR-302b|bta-miR-33a|miR-211-x|miR-218-x|miR-26-z	7.05577e-05	INHBB	inhibin subunit beta B [Source:VGNC Symbol;Acc:VGNC:30201]	Environmental Information Processing;Cellular Processes;Environmental Information Processing	Signaling molecules and interaction;Cellular community - eukaryotes;Signal transduction	ko04060//Cytokine-cytokine receptor interaction;ko04550//Signaling pathways regulating pluripotency of stem cells;ko04350//TGF-beta signaling pathway	K22687;K22687;K22687	GO:0005576//extracellular region;GO:0005615//extracellular space;GO:0048471//perinuclear region of cytoplasm;GO:0071944//cell periphery	GO:0005125//cytokine activity;GO:0005179//hormone activity;GO:0008083//growth factor activity;GO:0042803//protein homodimerization activity	GO:0009267//cellular response to starvation;GO:0009611//response to wounding;GO:0010862//positive regulation of pathway-restricted SMAD protein phosphorylation;GO:0032686//negative regulation of hepatocyte growth factor production;GO:0032869//cellular response to insulin stimulus;GO:0032924//activin receptor signaling pathway;GO:0044320//cellular response to leptin stimulus;GO:0045444//fat cell d…
novel_circ_000126	ENSBTAG00000000719	ENSBTAG00000051600	0.946298	25	4	4	bta-miR-218|bta-miR-302a|bta-miR-302b|miR-218-x	0.0017667	-	XP_032263750.1 A-kinase anchoring protein 7 isoform X3 [Phoca vitulina]	-	-	-	-	GO:0005829//cytosol	GO:0034237//protein kinase A regulatory subunit binding	GO:0010738//regulation of protein kinase A signaling
novel_circ_000147	ENSBTAG00000052391	ENSBTAG00000013974	0.901806	10	3	2	bta-miR-135b|miR-497-y	0.019293	TMEM215	transmembrane protein 215 [Source:VGNC Symbol;Acc:VGNC:36037]	-	-	-	-	-	-	-
novel_circ_000253	ENSBTAG00000014488	ENSBTAG00000004119	0.99333	1	4	1	novel-m0101-3p	0.0344828	NEUROD2	neuronal differentiation 2 [Source:VGNC Symbol;Acc:VGNC:32018]	-	-	-	-	GO:0005634//nucleus	GO:0000977//RNA polymerase II regulatory region sequence-specific DNA binding;GO:0000978//RNA polymerase II proximal promoter sequence-specific DNA binding;GO:0000981//DNA-binding transcription factor activity, RNA polymerase II-specific;GO:0001228//DNA-binding transcription activator activity, RNA polymerase II-specific;GO:0003677//DNA binding;GO:0003700//DNA-binding transcription factor activit…	GO:0001662//behavioral fear response;GO:0006355//regulation of transcription, DNA-templated;GO:0006357//regulation of transcription by RNA polymerase II;GO:0007275//multicellular organism development;GO:0007399//nervous system development;GO:0008306//associative learning;GO:0016567//protein ubiquitination;GO:0021695//cerebellar cortex development;GO:0030154//cell differentiation;GO:0030182//neuro…
novel_circ_000253	ENSBTAG00000014488	ENSBTAG00000054924	0.986476	1	4	1	novel-m0101-3p	0.0344828	CPLX2	complexin 2 [Source:NCBI gene (formerly Entrezgene);Acc:281711]	Organismal Systems	Nervous system	ko04721//Synaptic vesicle cycle	K15294	GO:0030054//cell junction;GO:0031201//SNARE complex;GO:0043195//terminal bouton;GO:0044305//calyx of Held;GO:0045202//synapse;GO:0098793//presynapse;GO:0098978//glutamatergic synapse	GO:0000149//SNARE binding;GO:0017075//syntaxin-1 binding;GO:0019905//syntaxin binding	GO:0006836//neurotransmitter transport;GO:0006887//exocytosis;GO:0016079//synaptic vesicle exocytosis;GO:0031630//regulation of synaptic vesicle fusion to presynaptic active zone membrane;GO:0031915//positive regulation of synaptic plasticity;GO:0046928//regulation of neurotransmitter secretion
novel_circ_000278	ENSBTAG00000008708	ENSBTAG00000002390	0.942236	3	1	1	miR-10926-z	0.0258621	CCDC184	coiled-coil domain containing 184 [Source:VGNC Symbol;Acc:VGNC:26879]	-	-	-	-	GO:0005737//cytoplasm	-	-
novel_circ_000278	ENSBTAG00000008708	ENSBTAG00000004305	0.961186	3	4	2	bta-miR-455-5p|miR-10926-z	0.00266709	RGS16	regulator of G protein signaling 16 [Source:VGNC Symbol;Acc:VGNC:33915]	-	-	-	-	GO:0005737//cytoplasm;GO:0016020//membrane;GO:0031224//intrinsic component of membrane	GO:0005096//GTPase activator activity	GO:0007186//G protein-coupled receptor signaling pathway;GO:0009968//negative regulation of signal transduction;GO:0043547//positive regulation of GTPase activity
novel_circ_000278	ENSBTAG00000008708	ENSBTAG00000007109	0.970789	3	1	1	miR-10926-z	0.0258621	ASB2	ankyrin repeat and SOCS box containing 2 [Source:VGNC Symbol;Acc:VGNC:26196]	-	-	-	-	GO:0000151//ubiquitin ligase complex	GO:0005515//protein binding;GO:0061630//ubiquitin protein ligase activity	GO:0006511//ubiquitin-dependent protein catabolic process;GO:0016567//protein ubiquitination;GO:0035556//intracellular signal transduction;GO:0035914//skeletal muscle cell differentiation
novel_circ_000278	ENSBTAG00000008708	ENSBTAG00000010793	0.972103	3	1	1	miR-34-x	0.0258621	CCDC80	coiled-coil domain containing 80 [Source:VGNC Symbol;Acc:VGNC:26918]	-	-	-	-	GO:0005604//basement membrane;GO:0005614//interstitial matrix;GO:0016020//membrane;GO:0016021//integral component of membrane;GO:0031012//extracellular matrix	GO:0001968//fibronectin binding;GO:0005539//glycosaminoglycan binding;GO:0008201//heparin binding	GO:0009617//response to bacterium;GO:0010811//positive regulation of cell-substrate adhesion;GO:0030198//extracellular matrix organization
novel_circ_000278	ENSBTAG00000008708	ENSBTAG00000011095	0.981634	3	6	2	bta-miR-455-5p|miR-10926-z	0.00658881	FAR2	fatty acyl-CoA reductase 2 [Source:VGNC Symbol;Acc:VGNC:28864]	Cellular Processes	Transport and catabolism	ko04146//Peroxisome	K13356	GO:0005777//peroxisome;GO:0005779//integral component of peroxisomal membrane	GO:0080019//fatty-acyl-CoA reductase (alcohol-forming) activity	GO:0035336//long-chain fatty-acyl-CoA metabolic process
novel_circ_000278	ENSBTAG00000008708	ENSBTAG00000014194	0.976291	3	11	2	miR-10926-z|miR-34-x	0.0234356	ADARB2	adenosine deaminase RNA specific B2 (inactive) [Source:NCBI gene (formerly Entrezgene);Acc:524061]	-	-	-	-	GO:0005730//nucleolus;GO:0005737//cytoplasm	GO:0003723//RNA binding;GO:0003725//double-stranded RNA binding;GO:0003726//double-stranded RNA adenosine deaminase activity;GO:0004000//adenosine deaminase activity;GO:0008251//tRNA-specific adenosine deaminase activity	GO:0006382//adenosine to inosine editing;GO:0006396//RNA processing
novel_circ_000278	ENSBTAG00000008708	ENSBTAG00000014968	0.914048	3	1	1	miR-34-x	0.0258621	YJEFN3	YjeF N-terminal domain containing 3 [Source:VGNC Symbol;Acc:VGNC:97329]	-	-	-	-	GO:0005739//mitochondrion	GO:0052856//NADHX epimerase activity;GO:0052857//NADPHX epimerase activity	-
novel_circ_000278	ENSBTAG00000008708	ENSBTAG00000017198	0.96483	3	4	2	bta-miR-455-5p|miR-34-x	0.00266709	CHRNA4	cholinergic receptor nicotinic alpha 4 subunit [Source:VGNC Symbol;Acc:VGNC:27326]	Environmental Information Processing;Organismal Systems;Human Diseases	Signaling molecules and interaction;Nervous system;Substance dependence	ko04080//Neuroactive ligand-receptor interaction;ko04725//Cholinergic synapse;ko05033//Nicotine addiction	K04806;K04806;K04806	GO:0005886//plasma membrane;GO:0005887//integral component of plasma membrane;GO:0005892//acetylcholine-gated channel complex;GO:0016020//membrane;GO:0016021//integral component of membrane;GO:0030054//cell junction;GO:0043005//neuron projection;GO:0045202//synapse;GO:0045211//postsynaptic membrane	GO:0004888//transmembrane signaling receptor activity;GO:0005216//ion channel activity;GO:0005230//extracellular ligand-gated ion channel activity;GO:0015464//acetylcholine receptor activity;GO:0022848//acetylcholine-gated cation-selective channel activity;GO:0030594//neurotransmitter receptor activity	GO:0001666//response to hypoxia;GO:0006281//DNA repair;GO:0006811//ion transport;GO:0006979//response to oxidative stress;GO:0007165//signal transduction;GO:0007268//chemical synaptic transmission;GO:0007271//synaptic transmission, cholinergic;GO:0034220//ion transmembrane transport;GO:0035094//response to nicotine;GO:0035095//behavioral response to nicotine;GO:0042391//regulation of membrane pot…
novel_circ_000278	ENSBTAG00000008708	ENSBTAG00000018307	0.949933	3	1	1	miR-10926-z	0.0258621	SEMA3F	semaphorin 3F [Source:VGNC Symbol;Acc:VGNC:34431]	Organismal Systems	Development	ko04360//Axon guidance	K06840	GO:0005615//extracellular space;GO:0005887//integral component of plasma membrane;GO:0098978//glutamatergic synapse	GO:0005515//protein binding;GO:0030215//semaphorin receptor binding;GO:0045499//chemorepellent activity	GO:0001755//neural crest cell migration;GO:0007411//axon guidance;GO:0021612//facial nerve structural organization;GO:0021637//trigeminal nerve structural organization;GO:0021675//nerve development;GO:0021785//branchiomotor neuron axon guidance;GO:0030335//positive regulation of cell migration;GO:0036486//ventral trunk neural crest cell migration;GO:0048843//negative regulation of axon extension …
novel_circ_000278	ENSBTAG00000008708	ENSBTAG00000021727	0.917264	3	2	2	miR-10926-z|miR-34-x	0.000449775	NTSR1	neurotensin receptor 1 [Source:VGNC Symbol;Acc:VGNC:32312]	Environmental Information Processing;Environmental Information Processing	Signaling molecules and interaction;Signal transduction	ko04080//Neuroactive ligand-receptor interaction;ko04020//Calcium signaling pathway	K04211;K04211	GO:0005886//plasma membrane;GO:0005887//integral component of plasma membrane;GO:0016020//membrane;GO:0016021//integral component of membrane;GO:0045121//membrane raft	GO:0004930//G protein-coupled receptor activity;GO:0016492//G protein-coupled neurotensin receptor activity;GO:0042802//identical protein binding	GO:0007165//signal transduction;GO:0007186//G protein-coupled receptor signaling pathway;GO:0007218//neuropeptide signaling pathway;GO:0008344//adult locomotory behavior;GO:0043066//negative regulation of apoptotic process
novel_circ_000278	ENSBTAG00000008708	ENSBTAG00000033983	0.98928	3	1	1	miR-34-x	0.0258621	MAP2K1	mitogen-activated protein kinase kinase 1 [Source:VGNC Symbol;Acc:VGNC:31183]	Human Diseases;Environmental Information Processing;Human Diseases;Human Diseases;Environmental Information Processing;Human Diseases;Environmental Information Processing;Human Diseases;Environmental Information Processing;Human Diseases;Human Diseases;Human Diseases;Environmental Information Processing;Cellular Processes;Human Diseases;Human Diseases;Cellular Processes;Organismal Systems;Cellula…	Cancers;Signal transduction;Neurodegenerative diseases;Infectious diseases;Signal transduction;Infectious diseases;Signal transduction;Infectious disease: viral;Signal transduction;Infectious diseases;Infectious diseases;Substance dependence;Signal transduction;Cell motility;Cancers;Infectious diseases;Cellular community - eukaryotes;Immune system;Cell growth and death;Infectious disease: bacteri…	ko05200//Pathways in cancer;ko04151//PI3K-Akt signaling pathway;ko05010//Alzheimer disease;ko05165//Human papillomavirus infection;ko04014//Ras signaling pathway;ko05166//HTLV-I infection;ko04010//MAPK signaling pathway;ko05170//Human immunodeficiency virus 1 infection;ko04015//Rap1 signaling pathway;ko05132//Salmonella infection;ko05163//Human cytomegalovirus infection;ko05034//Alcoholism;ko0402…	K04368;K04368;K04368;K04368;K04368;K04368;K04368;K04368;K04368;K04368;K04368;K04368;K04368;K04368;K04368;K04368;K04368;K04368;K04368;K04368;K04368;K04368;K04368;K04368;K04368;K04368;K04368;K04368;K04368;K04368;K04368;K04368;K04368;K04368;K04368;K04368;K04368;K04368;K04368;K04368;K04368;K04368;K04368;K04368;K04368;K04368;K04368;K04368;K04368;K04368;K04368;K04368;K04368;K04368;K04368;K04368;K04368;…	GO:0005783//endoplasmic reticulum;GO:0005829//cytosol;GO:0005886//plasma membrane	GO:0000166//nucleotide binding;GO:0004672//protein kinase activity;GO:0004674//protein serine/threonine kinase activity;GO:0004708//MAP kinase kinase activity;GO:0005078//MAP-kinase scaffold activity;GO:0005524//ATP binding;GO:0008022//protein C-terminus binding;GO:0043539//protein serine/threonine kinase activator activity;GO:0047485//protein N-terminus binding;GO:0097110//scaffold protein bindi…	GO:0000187//activation of MAPK activity;GO:0006468//protein phosphorylation;GO:0007050//cell cycle arrest;GO:0007507//heart development;GO:0008285//negative regulation of cell proliferation;GO:0010628//positive regulation of gene expression;GO:0010629//negative regulation of gene expression;GO:0018107//peptidyl-threonine phosphorylation;GO:0021697//cerebellar cortex formation;GO:0030182//neuron d…
novel_circ_000278	ENSBTAG00000008708	ENSBTAG00000035958	0.94056	3	1	1	miR-10926-z	0.0258621	RHOBTB2	Rho-related BTB domain containing 2 [Source:NCBI gene (formerly Entrezgene);Acc:784567]	Genetic Information Processing	Folding, sorting and degradation	ko04120//Ubiquitin mediated proteolysis	K07868	GO:0005856//cytoskeleton;GO:0005886//plasma membrane;GO:0005938//cell cortex;GO:0031410//cytoplasmic vesicle;GO:0042995//cell projection;GO:0043231//intracellular membrane-bounded organelle	GO:0003924//GTPase activity;GO:0005515//protein binding;GO:0005525//GTP binding;GO:0019901//protein kinase binding	GO:0007015//actin filament organization;GO:0007163//establishment or maintenance of cell polarity;GO:0007264//small GTPase mediated signal transduction;GO:0008360//regulation of cell shape;GO:0030865//cortical cytoskeleton organization;GO:0032956//regulation of actin cytoskeleton organization;GO:0043652//engulfment of apoptotic cell
novel_circ_000278	ENSBTAG00000008708	ENSBTAG00000054046	0.939351	3	1	1	miR-34-x	0.0258621	-	XP_032321794.1 ankyrin repeat domain-containing protein 24 isoform X4 [Camelus ferus]	-	-	-	-	-	-	-
novel_circ_000325	ENSBTAG00000007734	ENSBTAG00000010866	0.997347	3	1	1	bta-miR-135b	0.0258621	BMPER	BMP binding endothelial regulator [Source:VGNC Symbol;Acc:VGNC:26523]	-	-	-	-	GO:0005576//extracellular region;GO:0005615//extracellular space;GO:0031012//extracellular matrix	GO:0005515//protein binding	GO:0001568//blood vessel development;GO:0001657//ureteric bud development;GO:0002043//blood vessel endothelial cell proliferation involved in sprouting angiogenesis;GO:0010594//regulation of endothelial cell migration;GO:0030514//negative regulation of BMP signaling pathway;GO:0042118//endothelial cell activation;GO:0045765//regulation of angiogenesis;GO:0048839//inner ear development;GO:0060393/…
novel_circ_000468	ENSBTAG00000054786	ENSBTAG00000006902	0.958889	20	6	4	bta-miR-190a|bta-miR-455-5p|miR-101-x|miR-211-x	0.00796047	KCNJ5	potassium inwardly rectifying channel subfamily J member 5 [Source:VGNC Symbol;Acc:VGNC:30462]	Organismal Systems;Organismal Systems;Organismal Systems;Organismal Systems;Organismal Systems;Organismal Systems;Organismal Systems;Human Diseases;Organismal Systems	Nervous system;Endocrine system;Endocrine system;Nervous system;Nervous system;Environmental adaptation;Endocrine system;Substance dependence;Endocrine system	ko04723//Retrograde endocannabinoid signaling;ko04921//Oxytocin signaling pathway;ko04915//Estrogen signaling pathway;ko04728//Dopaminergic synapse;ko04726//Serotonergic synapse;ko04713//Circadian entrainment;ko04925//Aldosterone synthesis and secretion;ko05032//Morphine addiction;ko04929//GnRH secretion	K04999;K04999;K04999;K04999;K04999;K04999;K04999;K04999;K04999	GO:0008076//voltage-gated potassium channel complex;GO:0016020//membrane;GO:0016021//integral component of membrane	GO:0005242//inward rectifier potassium channel activity;GO:0015467//G-protein activated inward rectifier potassium channel activity;GO:0086089//voltage-gated potassium channel activity involved in atrial cardiac muscle cell action potential repolarization	GO:0006813//potassium ion transport;GO:0086091//regulation of heart rate by cardiac conduction;GO:0098914//membrane repolarization during atrial cardiac muscle cell action potential;GO:1990573//potassium ion import across plasma membrane
novel_circ_000549	NA	ENSBTAG00000003574	0.924505	10	4	2	miR-211-x|miR-3535-z	0.0367802	SHISAL1	shisa like 1 [Source:VGNC Symbol;Acc:VGNC:30574]	-	-	-	-	GO:0016020//membrane;GO:0016021//integral component of membrane	-	-
novel_circ_000549	NA	ENSBTAG00000005230	0.984366	10	3	2	miR-211-x|miR-497-y	0.019293	SHOX2	short stature homeobox 2 [Source:VGNC Symbol;Acc:VGNC:34606]	-	-	-	-	GO:0005634//nucleus	GO:0000981//DNA-binding transcription factor activity, RNA polymerase II-specific;GO:0003677//DNA binding;GO:1990837//sequence-specific double-stranded DNA binding	GO:0000122//negative regulation of transcription by RNA polymerase II;GO:0001649//osteoblast differentiation;GO:0002027//regulation of heart rate;GO:0002053//positive regulation of mesenchymal cell proliferation;GO:0002062//chondrocyte differentiation;GO:0002063//chondrocyte development;GO:0003163//sinoatrial node development;GO:0003170//heart valve development;GO:0003209//cardiac atrium morphoge…
novel_circ_000549	NA	ENSBTAG00000006902	0.944524	10	6	3	bta-miR-190a|bta-miR-455-5p|miR-211-x	0.00820502	KCNJ5	potassium inwardly rectifying channel subfamily J member 5 [Source:VGNC Symbol;Acc:VGNC:30462]	Organismal Systems;Organismal Systems;Organismal Systems;Organismal Systems;Organismal Systems;Organismal Systems;Organismal Systems;Human Diseases;Organismal Systems	Nervous system;Endocrine system;Endocrine system;Nervous system;Nervous system;Environmental adaptation;Endocrine system;Substance dependence;Endocrine system	ko04723//Retrograde endocannabinoid signaling;ko04921//Oxytocin signaling pathway;ko04915//Estrogen signaling pathway;ko04728//Dopaminergic synapse;ko04726//Serotonergic synapse;ko04713//Circadian entrainment;ko04925//Aldosterone synthesis and secretion;ko05032//Morphine addiction;ko04929//GnRH secretion	K04999;K04999;K04999;K04999;K04999;K04999;K04999;K04999;K04999	GO:0008076//voltage-gated potassium channel complex;GO:0016020//membrane;GO:0016021//integral component of membrane	GO:0005242//inward rectifier potassium channel activity;GO:0015467//G-protein activated inward rectifier potassium channel activity;GO:0086089//voltage-gated potassium channel activity involved in atrial cardiac muscle cell action potential repolarization	GO:0006813//potassium ion transport;GO:0086091//regulation of heart rate by cardiac conduction;GO:0098914//membrane repolarization during atrial cardiac muscle cell action potential;GO:1990573//potassium ion import across plasma membrane
novel_circ_000549	NA	ENSBTAG00000014530	0.909312	10	2	2	bta-miR-135b|bta-miR-144	0.00674663	NTNG1	netrin G1 [Source:VGNC Symbol;Acc:VGNC:50086]	Environmental Information Processing;Organismal Systems	Signaling molecules and interaction;Development	ko04514//Cell adhesion molecules (CAMs);ko04360//Axon guidance	K07522;K07522	GO:0005886//plasma membrane;GO:0043256//laminin complex	GO:0050839//cell adhesion molecule binding;GO:0098632//cell-cell adhesion mediator activity	GO:0009887//animal organ morphogenesis;GO:0009888//tissue development;GO:0016477//cell migration;GO:0034446//substrate adhesion-dependent cell spreading;GO:0070831//basement membrane assembly;GO:0099560//synaptic membrane adhesion
novel_circ_000549	NA	ENSBTAG00000014758	0.982244	10	3	2	bta-miR-33a|miR-497-y	0.019293	WIF1	WNT inhibitory factor 1 [Source:VGNC Symbol;Acc:VGNC:36938]	Environmental Information Processing	Signal transduction	ko04310//Wnt signaling pathway	K01691	GO:0005576//extracellular region;GO:0009986//cell surface	GO:0005102//signaling receptor binding	GO:0045600//positive regulation of fat cell differentiation;GO:0048856//anatomical structure development
novel_circ_000554	ENSBTAG00000003088	ENSBTAG00000000199	0.907964	1	3	1	bta-miR-135b	0.0258621	PDP1	pyruvate dehyrogenase phosphatase catalytic subunit 1 [Source:VGNC Symbol;Acc:VGNC:32713]	-	-	-	-	-	GO:0004721//phosphoprotein phosphatase activity;GO:0004722//protein serine/threonine phosphatase activity;GO:0016787//hydrolase activity;GO:0016791//phosphatase activity;GO:0043169//cation binding;GO:0046872//metal ion binding	GO:0006470//protein dephosphorylation;GO:0035970//peptidyl-threonine dephosphorylation
novel_circ_000554	ENSBTAG00000003088	ENSBTAG00000008571	0.966489	1	3	1	bta-miR-135b	0.0258621	CUX2	cut like homeobox 2 [Source:VGNC Symbol;Acc:VGNC:27840]	-	-	-	-	GO:0005634//nucleus	GO:0000977//RNA polymerase II regulatory region sequence-specific DNA binding;GO:0000978//RNA polymerase II proximal promoter sequence-specific DNA binding;GO:0000981//DNA-binding transcription factor activity, RNA polymerase II-specific;GO:0001227//DNA-binding transcription repressor activity, RNA polymerase II-specific;GO:0003677//DNA binding;GO:0043565//sequence-specific DNA binding;GO:1990837…	GO:0000122//negative regulation of transcription by RNA polymerase II;GO:0006355//regulation of transcription, DNA-templated;GO:0006357//regulation of transcription by RNA polymerase II;GO:0007614//short-term memory;GO:0010628//positive regulation of gene expression;GO:0045892//negative regulation of transcription, DNA-templated;GO:0050775//positive regulation of dendrite morphogenesis;GO:0050890…
novel_circ_000554	ENSBTAG00000003088	ENSBTAG00000014508	0.941515	1	1	1	bta-miR-135b	0.00862069	FBXO40	F-box protein 40 [Source:VGNC Symbol;Acc:VGNC:28911]	-	-	-	-	GO:0005737//cytoplasm	GO:0005515//protein binding;GO:0008270//zinc ion binding;GO:0046872//metal ion binding;GO:0061630//ubiquitin protein ligase activity	GO:0016567//protein ubiquitination;GO:0042692//muscle cell differentiation
novel_circ_000761	ENSBTAG00000013801	ENSBTAG00000014758	0.954175	1	3	1	miR-497-y	0.0258621	WIF1	WNT inhibitory factor 1 [Source:VGNC Symbol;Acc:VGNC:36938]	Environmental Information Processing	Signal transduction	ko04310//Wnt signaling pathway	K01691	GO:0005576//extracellular region;GO:0009986//cell surface	GO:0005102//signaling receptor binding	GO:0045600//positive regulation of fat cell differentiation;GO:0048856//anatomical structure development
novel_circ_000825	ENSBTAG00000015200	ENSBTAG00000050359	0.958258	2	1	1	miR-485-y	0.0172414	-	XP_010861487.1 PREDICTED: zinc finger protein 616-like isoform X2 [Bison bison bison]	Human Diseases	Infectious diseases	ko05168//Herpes simplex infection	K09228	-	GO:0000978//RNA polymerase II proximal promoter sequence-specific DNA binding;GO:0000981//DNA-binding transcription factor activity, RNA polymerase II-specific	GO:0006355//regulation of transcription, DNA-templated;GO:0006357//regulation of transcription by RNA polymerase II
novel_circ_000850	ENSBTAG00000006995	ENSBTAG00000012144	0.909457	7	2	2	bta-miR-11974|miR-10926-z	0.00314843	ZMYND19	zinc finger MYND-type containing 19 [Source:VGNC Symbol;Acc:VGNC:37205]	-	-	-	-	GO:0005737//cytoplasm;GO:0016020//membrane;GO:0045202//synapse	-	-
novel_circ_000919	ENSBTAG00000003366	ENSBTAG00000001576	0.973674	3	1	1	bta-miR-135b	0.0258621	TMEM140	transmembrane protein 140 [Source:VGNC Symbol;Acc:VGNC:35973]	-	-	-	-	GO:0016020//membrane;GO:0016021//integral component of membrane	-	-
novel_circ_000957	ENSBTAG00000017490	ENSBTAG00000019291	0.911443	4	1	1	bta-miR-455-3p	0.0344828	GRB14	growth factor receptor bound protein 14 [Source:VGNC Symbol;Acc:VGNC:29630]	-	-	-	-	GO:0005737//cytoplasm;GO:0005886//plasma membrane;GO:0043231//intracellular membrane-bounded organelle	GO:0030674//protein binding, bridging;GO:0030971//receptor tyrosine kinase binding	GO:0007165//signal transduction;GO:0008286//insulin receptor signaling pathway;GO:0046627//negative regulation of insulin receptor signaling pathway
novel_circ_000957	ENSBTAG00000017490	ENSBTAG00000019497	0.90496	4	4	2	bta-miR-302b|bta-miR-455-3p	0.00527147	ILDR2	immunoglobulin like domain containing receptor 2 [Source:VGNC Symbol;Acc:VGNC:30174]	-	-	-	-	GO:0016020//membrane;GO:0016021//integral component of membrane	-	GO:0009749//response to glucose;GO:0030073//insulin secretion;GO:0030154//cell differentiation;GO:0031016//pancreas development;GO:0048873//homeostasis of number of cells within a tissue
novel_circ_000957	ENSBTAG00000017490	ENSBTAG00000051600	0.969387	4	4	2	bta-miR-302a|bta-miR-302b	0.00527147	-	XP_032263750.1 A-kinase anchoring protein 7 isoform X3 [Phoca vitulina]	-	-	-	-	GO:0005829//cytosol	GO:0034237//protein kinase A regulatory subunit binding	GO:0010738//regulation of protein kinase A signaling
novel_circ_001279	ENSBTAG00000047287	ENSBTAG00000000199	0.949018	1	3	1	miR-9993-y	0.0258621	PDP1	pyruvate dehyrogenase phosphatase catalytic subunit 1 [Source:VGNC Symbol;Acc:VGNC:32713]	-	-	-	-	-	GO:0004721//phosphoprotein phosphatase activity;GO:0004722//protein serine/threonine phosphatase activity;GO:0016787//hydrolase activity;GO:0016791//phosphatase activity;GO:0043169//cation binding;GO:0046872//metal ion binding	GO:0006470//protein dephosphorylation;GO:0035970//peptidyl-threonine dephosphorylation
novel_circ_001333	ENSBTAG00000020296	ENSBTAG00000050359	0.924171	3	1	1	miR-485-y	0.0258621	-	XP_010861487.1 PREDICTED: zinc finger protein 616-like isoform X2 [Bison bison bison]	Human Diseases	Infectious diseases	ko05168//Herpes simplex infection	K09228	-	GO:0000978//RNA polymerase II proximal promoter sequence-specific DNA binding;GO:0000981//DNA-binding transcription factor activity, RNA polymerase II-specific	GO:0006355//regulation of transcription, DNA-templated;GO:0006357//regulation of transcription by RNA polymerase II
novel_circ_001344	ENSBTAG00000018694	ENSBTAG00000034147	0.977554	2	1	1	miR-11977-z	0.0172414	OLFML2B	olfactomedin like 2B [Source:VGNC Symbol;Acc:VGNC:32423]	-	-	-	-	GO:0031012//extracellular matrix	GO:0042802//identical protein binding;GO:0050840//extracellular matrix binding	GO:0030198//extracellular matrix organization
novel_circ_001375	ENSBTAG00000020799	ENSBTAG00000012194	0.966597	2	2	1	bta-miR-2285ag-3p	0.0343328	DENND2C	DENN domain containing 2C [Source:VGNC Symbol;Acc:VGNC:27996]	-	-	-	-	GO:0005654//nucleoplasm	GO:0005085//guanyl-nucleotide exchange factor activity	GO:0050790//regulation of catalytic activity
novel_circ_001526	ENSBTAG00000010867	ENSBTAG00000052280	0.936914	2	2	2	bta-miR-11974|bta-miR-2339	0.000149925	NDUFA7	NADH:ubiquinone oxidoreductase subunit A7 [Source:NCBI gene (formerly Entrezgene);Acc:338063]	Metabolism;Human Diseases;Human Diseases;Organismal Systems;Human Diseases;Metabolism;Human Diseases;Organismal Systems	Global and overview maps;Neurodegenerative diseases;Neurodegenerative diseases;Environmental adaptation;Neurodegenerative diseases;Energy metabolism;Endocrine and metabolic diseases;Nervous system	ko01100//Metabolic pathways;ko05010//Alzheimer disease;ko05016//Huntington disease;ko04714//Thermogenesis;ko05012//Parkinson disease;ko00190//Oxidative phosphorylation;ko04932//Non-alcoholic fatty liver disease (NAFLD);ko04723//Retrograde endocannabinoid signaling	K03951;K03951;K03951;K03951;K03951;K03951;K03951;K03951	GO:0005743//mitochondrial inner membrane	GO:0008137//NADH dehydrogenase (ubiquinone) activity	GO:0042773//ATP synthesis coupled electron transport
novel_circ_001541	ENSBTAG00000030600	ENSBTAG00000019091	0.960282	1	2	1	novel-m0094-3p	0.0172414	RNPC3	RNA binding region (RNP1, RRM) containing 3 [Source:NCBI gene (formerly Entrezgene);Acc:768060]	-	-	-	-	GO:0005634//nucleus;GO:0005654//nucleoplasm;GO:0005689//U12-type spliceosomal complex	GO:0003676//nucleic acid binding;GO:0003723//RNA binding;GO:0005515//protein binding	-
novel_circ_001630	NA	ENSBTAG00000001183	0.940786	10	3	2	bta-miR-205|bta-miR-429	0.019293	KLHL33	kelch like family member 33 [Source:VGNC Symbol;Acc:VGNC:30659]	-	-	-	-	-	GO:0005515//protein binding	-
novel_circ_001825	ENSBTAG00000012691	ENSBTAG00000000910	0.928453	1	3	1	miR-382-x	0.0258621	SLC6A7	solute carrier family 6 member 7 [Source:VGNC Symbol;Acc:VGNC:34923]	Organismal Systems	Nervous system	ko04721//Synaptic vesicle cycle	K05040	GO:0005887//integral component of plasma membrane;GO:0016020//membrane;GO:0016021//integral component of membrane	GO:0015193//L-proline transmembrane transporter activity;GO:0015293//symporter activity	GO:0035524//proline transmembrane transport;GO:0035725//sodium ion transmembrane transport
novel_circ_001825	ENSBTAG00000012691	ENSBTAG00000008571	0.904499	1	3	1	miR-382-x	0.0258621	CUX2	cut like homeobox 2 [Source:VGNC Symbol;Acc:VGNC:27840]	-	-	-	-	GO:0005634//nucleus	GO:0000977//RNA polymerase II regulatory region sequence-specific DNA binding;GO:0000978//RNA polymerase II proximal promoter sequence-specific DNA binding;GO:0000981//DNA-binding transcription factor activity, RNA polymerase II-specific;GO:0001227//DNA-binding transcription repressor activity, RNA polymerase II-specific;GO:0003677//DNA binding;GO:0043565//sequence-specific DNA binding;GO:1990837…	GO:0000122//negative regulation of transcription by RNA polymerase II;GO:0006355//regulation of transcription, DNA-templated;GO:0006357//regulation of transcription by RNA polymerase II;GO:0007614//short-term memory;GO:0010628//positive regulation of gene expression;GO:0045892//negative regulation of transcription, DNA-templated;GO:0050775//positive regulation of dendrite morphogenesis;GO:0050890…
novel_circ_001825	ENSBTAG00000012691	ENSBTAG00000014384	0.948829	1	3	1	miR-382-x	0.0258621	ZDHHC22	zinc finger DHHC-type palmitoyltransferase 22 [Source:VGNC Symbol;Acc:VGNC:37138]	-	-	-	-	GO:0005783//endoplasmic reticulum;GO:0005794//Golgi apparatus;GO:0005886//plasma membrane;GO:0016020//membrane;GO:0016021//integral component of membrane	GO:0016409//palmitoyltransferase activity;GO:0016740//transferase activity;GO:0016746//transferase activity, transferring acyl groups;GO:0019706//protein-cysteine S-palmitoyltransferase activity	GO:0006612//protein targeting to membrane;GO:0018215//protein phosphopantetheinylation;GO:0018230//peptidyl-L-cysteine S-palmitoylation;GO:0018345//protein palmitoylation;GO:0072659//protein localization to plasma membrane
novel_circ_001825	ENSBTAG00000012691	ENSBTAG00000021574	0.986781	1	4	1	miR-382-x	0.0344828	TCF7L2	transcription factor 7 like 2 [Source:VGNC Symbol;Acc:VGNC:55976]	Human Diseases;Human Diseases;Human Diseases;Human Diseases;Environmental Information Processing;Environmental Information Processing;Human Diseases;Human Diseases;Human Diseases;Organismal Systems;Human Diseases;Human Diseases;Human Diseases;Cellular Processes;Human Diseases;Human Diseases;Human Diseases;Human Diseases	Cancers;Infectious diseases;Infectious diseases;Cancers;Signal transduction;Signal transduction;Endocrine and metabolic diseases;Cancers;Cancers;Endocrine system;Cancers;Cancers;Cardiovascular diseases;Cellular community - eukaryotes;Cancers;Cancers;Cancers;Cancers	ko05200//Pathways in cancer;ko05165//Human papillomavirus infection;ko05132//Salmonella infection;ko05225//Hepatocellular carcinoma;ko04310//Wnt signaling pathway;ko04390//Hippo signaling pathway;ko04934//Cushing syndrome;ko05226//Gastric cancer;ko05224//Breast cancer;ko04916//Melanogenesis;ko05215//Prostate cancer;ko05210//Colorectal cancer;ko05412//Arrhythmogenic right ventricular cardiomyopath…	K04491;K04491;K04491;K04491;K04491;K04491;K04491;K04491;K04491;K04491;K04491;K04491;K04491;K04491;K04491;K04491;K04491;K04491	GO:0000785//chromatin;GO:0005634//nucleus;GO:0005654//nucleoplasm;GO:0032993//protein-DNA complex;GO:0070369//beta-catenin-TCF7L2 complex;GO:0071664//catenin-TCF7L2 complex;GO:1990907//beta-catenin-TCF complex	GO:0000976//transcription regulatory region sequence-specific DNA binding;GO:0000978//RNA polymerase II proximal promoter sequence-specific DNA binding;GO:0000981//DNA-binding transcription factor activity, RNA polymerase II-specific;GO:0001103//RNA polymerase II repressing transcription factor binding;GO:0003677//DNA binding;GO:0003700//DNA-binding transcription factor activity;GO:0008013//beta-…	GO:0000122//negative regulation of transcription by RNA polymerase II;GO:0001568//blood vessel development;GO:0006357//regulation of transcription by RNA polymerase II;GO:0007050//cell cycle arrest;GO:0010909//positive regulation of heparan sulfate proteoglycan biosynthetic process;GO:0016055//Wnt signaling pathway;GO:0032024//positive regulation of insulin secretion;GO:0032092//positive regulati…
novel_circ_001826	ENSBTAG00000054239	ENSBTAG00000013974	0.949396	1	3	1	miR-10926-z	0.0258621	TMEM215	transmembrane protein 215 [Source:VGNC Symbol;Acc:VGNC:36037]	-	-	-	-	-	-	-
novel_circ_001922	NA	ENSBTAG00000004119	0.980846	23	4	3	bta-miR-12028|bta-miR-412|novel-m0101-3p	0.0242391	NEUROD2	neuronal differentiation 2 [Source:VGNC Symbol;Acc:VGNC:32018]	-	-	-	-	GO:0005634//nucleus	GO:0000977//RNA polymerase II regulatory region sequence-specific DNA binding;GO:0000978//RNA polymerase II proximal promoter sequence-specific DNA binding;GO:0000981//DNA-binding transcription factor activity, RNA polymerase II-specific;GO:0001228//DNA-binding transcription activator activity, RNA polymerase II-specific;GO:0003677//DNA binding;GO:0003700//DNA-binding transcription factor activit…	GO:0001662//behavioral fear response;GO:0006355//regulation of transcription, DNA-templated;GO:0006357//regulation of transcription by RNA polymerase II;GO:0007275//multicellular organism development;GO:0007399//nervous system development;GO:0008306//associative learning;GO:0016567//protein ubiquitination;GO:0021695//cerebellar cortex development;GO:0030154//cell differentiation;GO:0030182//neuro…
novel_circ_001922	NA	ENSBTAG00000006282	0.913692	23	4	4	bta-miR-7865|novel-m0011-5p|novel-m0094-3p|novel-m0101-3p	0.00123669	POU2AF1	POU class 2 homeobox associating factor 1 [Source:VGNC Symbol;Acc:VGNC:33173]	-	-	-	-	GO:0090575//RNA polymerase II transcription factor complex	GO:0003677//DNA binding;GO:0003713//transcription coactivator activity	GO:0002314//germinal center B cell differentiation;GO:0032755//positive regulation of interleukin-6 production;GO:0045944//positive regulation of transcription by RNA polymerase II;GO:0098586//cellular response to virus
novel_circ_001922	NA	ENSBTAG00000019091	0.960959	23	2	2	bta-miR-200a|novel-m0094-3p	0.037931	RNPC3	RNA binding region (RNP1, RRM) containing 3 [Source:NCBI gene (formerly Entrezgene);Acc:768060]	-	-	-	-	GO:0005634//nucleus;GO:0005654//nucleoplasm;GO:0005689//U12-type spliceosomal complex	GO:0003676//nucleic acid binding;GO:0003723//RNA binding;GO:0005515//protein binding	-
novel_circ_001922	NA	ENSBTAG00000054924	0.982416	23	4	3	bta-miR-7865|miR-11977-z|novel-m0101-3p	0.0242391	CPLX2	complexin 2 [Source:NCBI gene (formerly Entrezgene);Acc:281711]	Organismal Systems	Nervous system	ko04721//Synaptic vesicle cycle	K15294	GO:0030054//cell junction;GO:0031201//SNARE complex;GO:0043195//terminal bouton;GO:0044305//calyx of Held;GO:0045202//synapse;GO:0098793//presynapse;GO:0098978//glutamatergic synapse	GO:0000149//SNARE binding;GO:0017075//syntaxin-1 binding;GO:0019905//syntaxin binding	GO:0006836//neurotransmitter transport;GO:0006887//exocytosis;GO:0016079//synaptic vesicle exocytosis;GO:0031630//regulation of synaptic vesicle fusion to presynaptic active zone membrane;GO:0031915//positive regulation of synaptic plasticity;GO:0046928//regulation of neurotransmitter secretion
novel_circ_001961	NA	ENSBTAG00000007782	0.914525	4	1	1	bta-miR-144	0.0344828	MYOT	myotilin [Source:VGNC Symbol;Acc:VGNC:55225]	-	-	-	-	-	-	-
novel_circ_002039	ENSBTAG00000022801	ENSBTAG00000017866	0.931786	5	5	3	bta-miR-105a|bta-miR-200b|bta-miR-200c	0.000384102	CD36	CD36 molecule [Source:NCBI gene (formerly Entrezgene);Acc:281052]	Cellular Processes;Organismal Systems;Environmental Information Processing;Human Diseases;Human Diseases;Environmental Information Processing;Organismal Systems;Organismal Systems;Organismal Systems;Organismal Systems	Transport and catabolism;Immune system;Signal transduction;Infectious diseases;Endocrine and metabolic diseases;Signaling molecules and interaction;Endocrine system;Endocrine system;Digestive system;Digestive system	ko04145//Phagosome;ko04640//Hematopoietic cell lineage;ko04152//AMPK signaling pathway;ko05144//Malaria;ko04931//Insulin resistance;ko04512//ECM-receptor interaction;ko03320//PPAR signaling pathway;ko04920//Adipocytokine signaling pathway;ko04979//Cholesterol metabolism;ko04975//Fat digestion and absorption	K06259;K06259;K06259;K06259;K06259;K06259;K06259;K06259;K06259;K06259	GO:0005794//Golgi apparatus;GO:0005886//plasma membrane;GO:0016020//membrane;GO:0016021//integral component of membrane;GO:0016324//apical plasma membrane	-	GO:0006955//immune response;GO:0007155//cell adhesion;GO:0007166//cell surface receptor signaling pathway
novel_circ_002082	ENSBTAG00000034936	ENSBTAG00000014758	0.902931	1	3	1	miR-195-z	0.0258621	WIF1	WNT inhibitory factor 1 [Source:VGNC Symbol;Acc:VGNC:36938]	Environmental Information Processing	Signal transduction	ko04310//Wnt signaling pathway	K01691	GO:0005576//extracellular region;GO:0009986//cell surface	GO:0005102//signaling receptor binding	GO:0045600//positive regulation of fat cell differentiation;GO:0048856//anatomical structure development
novel_circ_002083	ENSBTAG00000004997	ENSBTAG00000050852	0.930175	2	1	1	bta-miR-302b	0.0172414	CXCL9	C-X-C motif chemokine ligand 9 [Source:NCBI gene (formerly Entrezgene);Acc:513990]	Environmental Information Processing;Organismal Systems;Organismal Systems;Environmental Information Processing	Signaling molecules and interaction;Immune system;Immune system;Signaling molecules and interaction	ko04060//Cytokine-cytokine receptor interaction;ko04062//Chemokine signaling pathway;ko04620//Toll-like receptor signaling pathway;ko04061//Viral protein interaction with cytokine and cytokine receptor	K05416;K05416;K05416;K05416	GO:0005576//extracellular region;GO:0005615//extracellular space;GO:0009897//external side of plasma membrane	GO:0008009//chemokine activity;GO:0048248//CXCR3 chemokine receptor binding	GO:0006935//chemotaxis;GO:0006952//defense response;GO:0006955//immune response;GO:0007189//adenylate cyclase-activating G protein-coupled receptor signaling pathway;GO:0009617//response to bacterium;GO:0042127//regulation of cell proliferation;GO:0045663//positive regulation of myoblast differentiation;GO:0051281//positive regulation of release of sequestered calcium ion into cytosol;GO:0051607/…
novel_circ_002197	ENSBTAG00000051239	ENSBTAG00000016058	0.914964	1	2	1	bta-miR-144	0.0172414	FAM83B	family with sequence similarity 83 member B [Source:VGNC Symbol;Acc:VGNC:28833]	-	-	-	-	GO:0005737//cytoplasm;GO:0016020//membrane	GO:0005154//epidermal growth factor receptor binding;GO:0019901//protein kinase binding;GO:0036312//phosphatidylinositol 3-kinase regulatory subunit binding;GO:0036313//phosphatidylinositol 3-kinase catalytic subunit binding	GO:0007165//signal transduction;GO:0007173//epidermal growth factor receptor signaling pathway;GO:0008283//cell proliferation
novel_circ_002197	ENSBTAG00000051239	ENSBTAG00000038700	0.902317	1	3	1	bta-miR-144	0.0258621	FAM124B	family with sequence similarity 124 member B [Source:VGNC Symbol;Acc:VGNC:56107]	-	-	-	-	GO:0005654//nucleoplasm;GO:0005739//mitochondrion	-	-
novel_circ_002223	NA	ENSBTAG00000004305	0.969166	7	4	2	miR-10926-z|miR-652-x	0.0178005	RGS16	regulator of G protein signaling 16 [Source:VGNC Symbol;Acc:VGNC:33915]	-	-	-	-	GO:0005737//cytoplasm;GO:0016020//membrane;GO:0031224//intrinsic component of membrane	GO:0005096//GTPase activator activity	GO:0007186//G protein-coupled receptor signaling pathway;GO:0009968//negative regulation of signal transduction;GO:0043547//positive regulation of GTPase activity
novel_circ_002223	NA	ENSBTAG00000005104	0.987804	7	3	2	miR-218-x|miR-34-x	0.0091691	MGAT5B	alpha-1,6-mannosylglycoprotein 6-beta-N-acetylglucosaminyltransferase B [Source:VGNC Symbol;Acc:VGNC:55847]	Metabolism;Metabolism;Metabolism	Global and overview maps;Glycan biosynthesis and metabolism;Glycan biosynthesis and metabolism	ko01100//Metabolic pathways;ko00510//N-Glycan biosynthesis;ko00515//Mannose type O-glycan biosyntheis	K09661;K09661;K09661	GO:0000139//Golgi membrane;GO:0005794//Golgi apparatus;GO:0016020//membrane;GO:0016021//integral component of membrane	GO:0016740//transferase activity;GO:0016757//transferase activity, transferring glycosyl groups;GO:0030144//alpha-1,6-mannosylglycoprotein 6-beta-N-acetylglucosaminyltransferase activity;GO:0030145//manganese ion binding	GO:0006486//protein glycosylation;GO:0006487//protein N-linked glycosylation;GO:0018215//protein phosphopantetheinylation;GO:0018242//protein O-linked glycosylation via serine
novel_circ_002223	NA	ENSBTAG00000009338	0.981376	7	4	2	miR-218-x|miR-34-x	0.0178005	LRRC7	leucine rich repeat containing 7 [Source:VGNC Symbol;Acc:VGNC:55251]	-	-	-	-	-	GO:0005515//protein binding	-
novel_circ_002223	NA	ENSBTAG00000011095	0.932148	7	6	2	miR-10926-z|miR-218-x	0.0419197	FAR2	fatty acyl-CoA reductase 2 [Source:VGNC Symbol;Acc:VGNC:28864]	Cellular Processes	Transport and catabolism	ko04146//Peroxisome	K13356	GO:0005777//peroxisome;GO:0005779//integral component of peroxisomal membrane	GO:0080019//fatty-acyl-CoA reductase (alcohol-forming) activity	GO:0035336//long-chain fatty-acyl-CoA metabolic process
novel_circ_002223	NA	ENSBTAG00000011381	0.991379	7	2	2	miR-106-x|miR-34-x	0.00314843	SLC30A3	solute carrier family 30 member 3 [Source:VGNC Symbol;Acc:VGNC:34808]	-	-	-	-	GO:0005737//cytoplasm;GO:0005770//late endosome;GO:0008021//synaptic vesicle;GO:0016021//integral component of membrane;GO:0030285//integral component of synaptic vesicle membrane;GO:0030672//synaptic vesicle membrane;GO:0043005//neuron projection;GO:0097457//hippocampal mossy fiber;GO:0098686//hippocampal mossy fiber to CA3 synapse;GO:0098978//glutamatergic synapse	GO:0008324//cation transmembrane transporter activity	GO:0006812//cation transport;GO:0051050//positive regulation of transport;GO:0055085//transmembrane transport;GO:0061088//regulation of sequestering of zinc ion;GO:0099180//zinc ion import into synaptic vesicle
novel_circ_002223	NA	ENSBTAG00000012630	0.941272	7	2	2	miR-34-x|miR-652-x	0.00314843	PAMR1	peptidase domain containing associated with muscle reration 1 [Source:VGNC Symbol;Acc:VGNC:32562]	-	-	-	-	-	GO:0004252//serine-type endopeptidase activity;GO:0005509//calcium ion binding	GO:0006508//proteolysis
novel_circ_002223	NA	ENSBTAG00000014194	0.966871	7	11	3	miR-10926-z|miR-218-x|miR-34-x	0.0182976	ADARB2	adenosine deaminase RNA specific B2 (inactive) [Source:NCBI gene (formerly Entrezgene);Acc:524061]	-	-	-	-	GO:0005730//nucleolus;GO:0005737//cytoplasm	GO:0003723//RNA binding;GO:0003725//double-stranded RNA binding;GO:0003726//double-stranded RNA adenosine deaminase activity;GO:0004000//adenosine deaminase activity;GO:0008251//tRNA-specific adenosine deaminase activity	GO:0006382//adenosine to inosine editing;GO:0006396//RNA processing
novel_circ_002223	NA	ENSBTAG00000014384	0.983074	7	3	2	bta-miR-455-3p|miR-652-x	0.0091691	ZDHHC22	zinc finger DHHC-type palmitoyltransferase 22 [Source:VGNC Symbol;Acc:VGNC:37138]	-	-	-	-	GO:0005783//endoplasmic reticulum;GO:0005794//Golgi apparatus;GO:0005886//plasma membrane;GO:0016020//membrane;GO:0016021//integral component of membrane	GO:0016409//palmitoyltransferase activity;GO:0016740//transferase activity;GO:0016746//transferase activity, transferring acyl groups;GO:0019706//protein-cysteine S-palmitoyltransferase activity	GO:0006612//protein targeting to membrane;GO:0018215//protein phosphopantetheinylation;GO:0018230//peptidyl-L-cysteine S-palmitoylation;GO:0018345//protein palmitoylation;GO:0072659//protein localization to plasma membrane
novel_circ_002223	NA	ENSBTAG00000016455	0.90577	7	5	2	miR-34-x|miR-652-x	0.0287953	CACHD1	cache domain containing 1 [Source:VGNC Symbol;Acc:VGNC:26671]	-	-	-	-	GO:0005891//voltage-gated calcium channel complex;GO:0016020//membrane;GO:0016021//integral component of membrane	GO:0005245//voltage-gated calcium channel activity	GO:0006811//ion transport;GO:0006816//calcium ion transport;GO:0070588//calcium ion transmembrane transport
novel_circ_002223	NA	ENSBTAG00000020318	0.95123	7	5	2	miR-218-x|miR-34-x	0.0287953	DBNDD1	dysbindin domain containing 1 [Source:VGNC Symbol;Acc:VGNC:27891]	-	-	-	-	GO:0005737//cytoplasm	-	-
novel_circ_002223	NA	ENSBTAG00000021727	0.982878	7	2	2	miR-10926-z|miR-34-x	0.00314843	NTSR1	neurotensin receptor 1 [Source:VGNC Symbol;Acc:VGNC:32312]	Environmental Information Processing;Environmental Information Processing	Signaling molecules and interaction;Signal transduction	ko04080//Neuroactive ligand-receptor interaction;ko04020//Calcium signaling pathway	K04211;K04211	GO:0005886//plasma membrane;GO:0005887//integral component of plasma membrane;GO:0016020//membrane;GO:0016021//integral component of membrane;GO:0045121//membrane raft	GO:0004930//G protein-coupled receptor activity;GO:0016492//G protein-coupled neurotensin receptor activity;GO:0042802//identical protein binding	GO:0007165//signal transduction;GO:0007186//G protein-coupled receptor signaling pathway;GO:0007218//neuropeptide signaling pathway;GO:0008344//adult locomotory behavior;GO:0043066//negative regulation of apoptotic process
novel_circ_002223	NA	ENSBTAG00000045633	0.979213	7	2	2	bta-miR-455-3p|miR-34-x	0.00314843	AGTR1	angiotensin II receptor type 1 [Source:VGNC Symbol;Acc:VGNC:25745]	Human Diseases;Environmental Information Processing;Environmental Information Processing;Environmental Information Processing;Environmental Information Processing;Human Diseases;Organismal Systems;Environmental Information Processing;Organismal Systems;Human Diseases;Organismal Systems;Organismal Systems;Organismal Systems;Organismal Systems	Cancers;Signaling molecules and interaction;Signal transduction;Signal transduction;Signal transduction;Endocrine and metabolic diseases;Circulatory system;Signal transduction;Circulatory system;Endocrine and metabolic diseases;Endocrine system;Endocrine system;Endocrine system;Endocrine system	ko05200//Pathways in cancer;ko04080//Neuroactive ligand-receptor interaction;ko04020//Calcium signaling pathway;ko04022//cGMP - PKG signaling pathway;ko04072//Phospholipase D signaling pathway;ko04934//Cushing syndrome;ko04261//Adrenergic signaling in cardiomyocytes;ko04371//Apelin signaling pathway;ko04270//Vascular smooth muscle contraction;ko04933//AGE-RAGE signaling pathway in diabetic compli…	K04166;K04166;K04166;K04166;K04166;K04166;K04166;K04166;K04166;K04166;K04166;K04166;K04166;K04166	GO:0005886//plasma membrane;GO:0016021//integral component of membrane	GO:0001596//angiotensin type I receptor activity;GO:0004930//G protein-coupled receptor activity;GO:0004945//angiotensin type II receptor activity;GO:0031711//bradykinin receptor binding;GO:0046982//protein heterodimerization activity	GO:0001822//kidney development;GO:0007186//G protein-coupled receptor signaling pathway;GO:0007204//positive regulation of cytosolic calcium ion concentration;GO:0007266//Rho protein signal transduction;GO:0010873//positive regulation of cholesterol esterification;GO:0019229//regulation of vasoconstriction;GO:0019722//calcium-mediated signaling;GO:0032270//positive regulation of cellular protein …
novel_circ_002272	NA	ENSBTAG00000005745	0.951504	5	1	1	bta-miR-507-3p	0.0431035	HPSE	heparanase [Source:VGNC Symbol;Acc:VGNC:29948]	Metabolism;Human Diseases;Metabolism	Global and overview maps;Cancers;Glycan biosynthesis and metabolism	ko01100//Metabolic pathways;ko05205//Proteoglycans in cancer;ko00531//Glycosaminoglycan degradation	K07964;K07964;K07964	GO:0005634//nucleus;GO:0005654//nucleoplasm;GO:0005764//lysosome;GO:0016020//membrane;GO:0043231//intracellular membrane-bounded organelle;GO:0045121//membrane raft	GO:0016798//hydrolase activity, acting on glycosyl bonds;GO:0030305//heparanase activity;GO:0045545//syndecan binding	GO:0007160//cell-matrix adhesion;GO:0010575//positive regulation of vascular endothelial growth factor production;GO:0030194//positive regulation of blood coagulation;GO:0030200//heparan sulfate proteoglycan catabolic process;GO:0033690//positive regulation of osteoblast proliferation;GO:0042060//wound healing;GO:0051797//regulation of hair follicle development;GO:0051798//positive regulation of …
novel_circ_002272	NA	ENSBTAG00000020159	0.982382	5	5	2	bta-miR-137|bta-miR-182	0.0142139	NKAIN1	sodium/potassium transporting ATPase interacting 1 [Source:VGNC Symbol;Acc:VGNC:32091]	-	-	-	-	GO:0005886//plasma membrane;GO:0016020//membrane;GO:0016021//integral component of membrane	GO:0051117//ATPase binding	-
novel_circ_002309	ENSBTAG00000018709	ENSBTAG00000017866	0.946659	13	5	4	bta-miR-105a|bta-miR-200b|bta-miR-539|miR-193-x	0.000467188	CD36	CD36 molecule [Source:NCBI gene (formerly Entrezgene);Acc:281052]	Cellular Processes;Organismal Systems;Environmental Information Processing;Human Diseases;Human Diseases;Environmental Information Processing;Organismal Systems;Organismal Systems;Organismal Systems;Organismal Systems	Transport and catabolism;Immune system;Signal transduction;Infectious diseases;Endocrine and metabolic diseases;Signaling molecules and interaction;Endocrine system;Endocrine system;Digestive system;Digestive system	ko04145//Phagosome;ko04640//Hematopoietic cell lineage;ko04152//AMPK signaling pathway;ko05144//Malaria;ko04931//Insulin resistance;ko04512//ECM-receptor interaction;ko03320//PPAR signaling pathway;ko04920//Adipocytokine signaling pathway;ko04979//Cholesterol metabolism;ko04975//Fat digestion and absorption	K06259;K06259;K06259;K06259;K06259;K06259;K06259;K06259;K06259;K06259	GO:0005794//Golgi apparatus;GO:0005886//plasma membrane;GO:0016020//membrane;GO:0016021//integral component of membrane;GO:0016324//apical plasma membrane	-	GO:0006955//immune response;GO:0007155//cell adhesion;GO:0007166//cell surface receptor signaling pathway
novel_circ_002317	ENSBTAG00000019748	ENSBTAG00000000071	0.918568	12	4	3	bta-miR-200c|bta-miR-429|miR-200-y	0.00326455	PMP2	peripheral myelin protein 2 [Source:VGNC Symbol;Acc:VGNC:53876]	-	-	-	-	GO:0005737//cytoplasm;GO:0043209//myelin sheath	GO:0005504//fatty acid binding;GO:0008289//lipid binding;GO:0015485//cholesterol binding	GO:0061024//membrane organization
novel_circ_002317	ENSBTAG00000019748	ENSBTAG00000000914	0.975039	12	15	6	bta-miR-200b|bta-miR-200c|bta-miR-217|bta-miR-429|miR-11977-z|miR-200-y	0.00100026	OPRK1	opioid receptor kappa 1 [Source:VGNC Symbol;Acc:VGNC:32439]	Environmental Information Processing	Signaling molecules and interaction	ko04080//Neuroactive ligand-receptor interaction	K04214	GO:0005654//nucleoplasm;GO:0005829//cytosol;GO:0005886//plasma membrane;GO:0005887//integral component of plasma membrane;GO:0016021//integral component of membrane	GO:0004930//G protein-coupled receptor activity;GO:0004985//opioid receptor activity;GO:0038048//dynorphin receptor activity	GO:0006955//immune response;GO:0007186//G protein-coupled receptor signaling pathway;GO:0031635//adenylate cyclase-inhibiting opioid receptor signaling pathway;GO:0038003//opioid receptor signaling pathway;GO:0051607//defense response to virus
novel_circ_002317	ENSBTAG00000019748	ENSBTAG00000019870	0.967695	12	10	4	bta-miR-200b|bta-miR-200c|bta-miR-429|miR-200-y	0.0101546	SLC14A1	solute carrier family 14 member 1 [Source:VGNC Symbol;Acc:VGNC:53653]	-	-	-	-	GO:0005886//plasma membrane;GO:0005887//integral component of plasma membrane;GO:0016020//membrane;GO:0016021//integral component of membrane	GO:0005372//water transmembrane transporter activity;GO:0015204//urea transmembrane transporter activity;GO:0015265//urea channel activity;GO:0042802//identical protein binding	GO:0006833//water transport;GO:0015840//urea transport;GO:0071918//urea transmembrane transport
novel_circ_002338	ENSBTAG00000004249	ENSBTAG00000001576	0.904343	1	1	1	bta-miR-135b	0.00862069	TMEM140	transmembrane protein 140 [Source:VGNC Symbol;Acc:VGNC:35973]	-	-	-	-	GO:0016020//membrane;GO:0016021//integral component of membrane	-	-
novel_circ_002338	ENSBTAG00000004249	ENSBTAG00000013974	0.915399	1	3	1	bta-miR-135b	0.0258621	TMEM215	transmembrane protein 215 [Source:VGNC Symbol;Acc:VGNC:36037]	-	-	-	-	-	-	-
novel_circ_002387	ENSBTAG00000030852	ENSBTAG00000001082	0.944612	3	3	2	bta-miR-2285ag-3p|miR-34-x	0.00134143	SH2D5	SH2 domain containing 5 [Source:VGNC Symbol;Acc:VGNC:50133]	-	-	-	-	GO:0014069//postsynaptic density	-	-
novel_circ_002387	ENSBTAG00000030852	ENSBTAG00000012194	0.947989	3	2	2	bta-miR-2285ag-3p|miR-195-z	0.000449775	DENND2C	DENN domain containing 2C [Source:VGNC Symbol;Acc:VGNC:27996]	-	-	-	-	GO:0005654//nucleoplasm	GO:0005085//guanyl-nucleotide exchange factor activity	GO:0050790//regulation of catalytic activity
novel_circ_002387	ENSBTAG00000030852	ENSBTAG00000014968	0.900701	3	1	1	miR-34-x	0.0258621	YJEFN3	YjeF N-terminal domain containing 3 [Source:VGNC Symbol;Acc:VGNC:97329]	-	-	-	-	GO:0005739//mitochondrion	GO:0052856//NADHX epimerase activity;GO:0052857//NADPHX epimerase activity	-
novel_circ_002456	NA	ENSBTAG00000000071	0.91508	16	4	3	bta-miR-200c|bta-miR-429|miR-200-y	0.00807514	PMP2	peripheral myelin protein 2 [Source:VGNC Symbol;Acc:VGNC:53876]	-	-	-	-	GO:0005737//cytoplasm;GO:0043209//myelin sheath	GO:0005504//fatty acid binding;GO:0008289//lipid binding;GO:0015485//cholesterol binding	GO:0061024//membrane organization
novel_circ_002456	NA	ENSBTAG00000009997	0.928572	16	3	2	miR-141-y|novel-m0085-5p	0.0495542	ANO1	anoctamin 1 [Source:VGNC Symbol;Acc:VGNC:50077]	-	-	-	-	GO:0005654//nucleoplasm;GO:0005886//plasma membrane;GO:0016020//membrane;GO:0016021//integral component of membrane;GO:0016324//apical plasma membrane	GO:0005227//calcium activated cation channel activity;GO:0005229//intracellular calcium activated chloride channel activity;GO:0005254//chloride channel activity;GO:0015111//iodide transmembrane transporter activity;GO:0046983//protein dimerization activity	GO:0006812//cation transport;GO:0006821//chloride transport;GO:0015705//iodide transport;GO:0034605//cellular response to heat;GO:0035774//positive regulation of insulin secretion involved in cellular response to glucose stimulus;GO:0055085//transmembrane transport;GO:0098655//cation transmembrane transport;GO:1902476//chloride transmembrane transport
novel_circ_002624	ENSBTAG00000016228	ENSBTAG00000000199	0.926425	1	3	1	bta-miR-455-3p	0.0258621	PDP1	pyruvate dehyrogenase phosphatase catalytic subunit 1 [Source:VGNC Symbol;Acc:VGNC:32713]	-	-	-	-	-	GO:0004721//phosphoprotein phosphatase activity;GO:0004722//protein serine/threonine phosphatase activity;GO:0016787//hydrolase activity;GO:0016791//phosphatase activity;GO:0043169//cation binding;GO:0046872//metal ion binding	GO:0006470//protein dephosphorylation;GO:0035970//peptidyl-threonine dephosphorylation
novel_circ_002624	ENSBTAG00000016228	ENSBTAG00000008512	0.957674	1	2	1	bta-miR-455-3p	0.0172414	KCNV1	potassium voltage-gated channel modifier subfamily V member 1 [Source:VGNC Symbol;Acc:VGNC:30497]	-	-	-	-	GO:0008076//voltage-gated potassium channel complex;GO:0016020//membrane;GO:0016021//integral component of membrane	GO:0005216//ion channel activity;GO:0005244//voltage-gated ion channel activity;GO:0005249//voltage-gated potassium channel activity;GO:0005267//potassium channel activity;GO:0005515//protein binding	GO:0006811//ion transport;GO:0006813//potassium ion transport;GO:0034765//regulation of ion transmembrane transport;GO:0051260//protein homooligomerization;GO:0055085//transmembrane transport;GO:0071805//potassium ion transmembrane transport
novel_circ_002624	ENSBTAG00000016228	ENSBTAG00000014384	0.918502	1	3	1	bta-miR-455-3p	0.0258621	ZDHHC22	zinc finger DHHC-type palmitoyltransferase 22 [Source:VGNC Symbol;Acc:VGNC:37138]	-	-	-	-	GO:0005783//endoplasmic reticulum;GO:0005794//Golgi apparatus;GO:0005886//plasma membrane;GO:0016020//membrane;GO:0016021//integral component of membrane	GO:0016409//palmitoyltransferase activity;GO:0016740//transferase activity;GO:0016746//transferase activity, transferring acyl groups;GO:0019706//protein-cysteine S-palmitoyltransferase activity	GO:0006612//protein targeting to membrane;GO:0018215//protein phosphopantetheinylation;GO:0018230//peptidyl-L-cysteine S-palmitoylation;GO:0018345//protein palmitoylation;GO:0072659//protein localization to plasma membrane
novel_circ_002624	ENSBTAG00000016228	ENSBTAG00000019291	0.91096	1	1	1	bta-miR-455-3p	0.00862069	GRB14	growth factor receptor bound protein 14 [Source:VGNC Symbol;Acc:VGNC:29630]	-	-	-	-	GO:0005737//cytoplasm;GO:0005886//plasma membrane;GO:0043231//intracellular membrane-bounded organelle	GO:0030674//protein binding, bridging;GO:0030971//receptor tyrosine kinase binding	GO:0007165//signal transduction;GO:0008286//insulin receptor signaling pathway;GO:0046627//negative regulation of insulin receptor signaling pathway
novel_circ_002624	ENSBTAG00000016228	ENSBTAG00000021574	0.942648	1	4	1	bta-miR-455-3p	0.0344828	TCF7L2	transcription factor 7 like 2 [Source:VGNC Symbol;Acc:VGNC:55976]	Human Diseases;Human Diseases;Human Diseases;Human Diseases;Environmental Information Processing;Environmental Information Processing;Human Diseases;Human Diseases;Human Diseases;Organismal Systems;Human Diseases;Human Diseases;Human Diseases;Cellular Processes;Human Diseases;Human Diseases;Human Diseases;Human Diseases	Cancers;Infectious diseases;Infectious diseases;Cancers;Signal transduction;Signal transduction;Endocrine and metabolic diseases;Cancers;Cancers;Endocrine system;Cancers;Cancers;Cardiovascular diseases;Cellular community - eukaryotes;Cancers;Cancers;Cancers;Cancers	ko05200//Pathways in cancer;ko05165//Human papillomavirus infection;ko05132//Salmonella infection;ko05225//Hepatocellular carcinoma;ko04310//Wnt signaling pathway;ko04390//Hippo signaling pathway;ko04934//Cushing syndrome;ko05226//Gastric cancer;ko05224//Breast cancer;ko04916//Melanogenesis;ko05215//Prostate cancer;ko05210//Colorectal cancer;ko05412//Arrhythmogenic right ventricular cardiomyopath…	K04491;K04491;K04491;K04491;K04491;K04491;K04491;K04491;K04491;K04491;K04491;K04491;K04491;K04491;K04491;K04491;K04491;K04491	GO:0000785//chromatin;GO:0005634//nucleus;GO:0005654//nucleoplasm;GO:0032993//protein-DNA complex;GO:0070369//beta-catenin-TCF7L2 complex;GO:0071664//catenin-TCF7L2 complex;GO:1990907//beta-catenin-TCF complex	GO:0000976//transcription regulatory region sequence-specific DNA binding;GO:0000978//RNA polymerase II proximal promoter sequence-specific DNA binding;GO:0000981//DNA-binding transcription factor activity, RNA polymerase II-specific;GO:0001103//RNA polymerase II repressing transcription factor binding;GO:0003677//DNA binding;GO:0003700//DNA-binding transcription factor activity;GO:0008013//beta-…	GO:0000122//negative regulation of transcription by RNA polymerase II;GO:0001568//blood vessel development;GO:0006357//regulation of transcription by RNA polymerase II;GO:0007050//cell cycle arrest;GO:0010909//positive regulation of heparan sulfate proteoglycan biosynthetic process;GO:0016055//Wnt signaling pathway;GO:0032024//positive regulation of insulin secretion;GO:0032092//positive regulati…
novel_circ_002837	ENSBTAG00000008805	ENSBTAG00000007514	0.908269	4	3	2	miR-10926-z|miR-34-x	0.00266709	CPNE5	copine 5 [Source:VGNC Symbol;Acc:VGNC:27661]	-	-	-	-	GO:0005886//plasma membrane;GO:0043005//neuron projection;GO:0043025//neuronal cell body	GO:0005544//calcium-dependent phospholipid binding	GO:0071277//cellular response to calcium ion;GO:1903861//positive regulation of dendrite extension
novel_circ_002837	ENSBTAG00000008805	ENSBTAG00000038128	0.923891	4	1	1	miR-34-x	0.0344828	BOLA-DQA5	major histocompatibility complex, class II, DQ alpha 5 [Source:NCBI gene (formerly Entrezgene);Acc:282494]	Human Diseases;Human Diseases;Human Diseases;Human Diseases;Environmental Information Processing;Human Diseases;Human Diseases;Cellular Processes;Human Diseases;Human Diseases;Organismal Systems;Organismal Systems;Human Diseases;Organismal Systems;Human Diseases;Organismal Systems;Organismal Systems;Human Diseases;Human Diseases;Human Diseases;Human Diseases;Human Diseases;Human Diseases;Human Di…	Infectious diseases;Infectious diseases;Infectious diseases;Immune diseases;Signaling molecules and interaction;Infectious diseases;Infectious diseases;Transport and catabolism;Immune diseases;Infectious diseases;Immune system;Immune system;Cardiovascular diseases;Immune system;Immune diseases;Immune system;Immune system;Immune diseases;Immune diseases;Infectious diseases;Endocrine and metabolic …	ko05168//Herpes simplex infection;ko05166//HTLV-I infection;ko05169//Epstein-Barr virus infection;ko05322//Systemic lupus erythematosus;ko04514//Cell adhesion molecules (CAMs);ko05152//Tuberculosis;ko05150//Staphylococcus aureus infection;ko04145//Phagosome;ko05323//Rheumatoid arthritis;ko05164//Influenza A;ko04659//Th17 cell differentiation;ko04658//Th1 and Th2 cell differentiation;ko05416//Vira…	K06752;K06752;K06752;K06752;K06752;K06752;K06752;K06752;K06752;K06752;K06752;K06752;K06752;K06752;K06752;K06752;K06752;K06752;K06752;K06752;K06752;K06752;K06752;K06752	GO:0016020//membrane;GO:0016021//integral component of membrane;GO:0042613//MHC class II protein complex	-	GO:0002250//adaptive immune response;GO:0002376//immune system process;GO:0002504//antigen processing and presentation of peptide or polysaccharide antigen via MHC class II;GO:0006955//immune response;GO:0019882//antigen processing and presentation
novel_circ_002968	ENSBTAG00000033214	ENSBTAG00000002997	0.913216	3	4	3	bta-miR-218|miR-218-x|miR-218-z	1.57816e-05	ADAMTSL1	ADAMTS like 1 [Source:VGNC Symbol;Acc:VGNC:58359]	-	-	-	-	GO:0031012//extracellular matrix	GO:0004222//metalloendopeptidase activity	GO:0006508//proteolysis;GO:0030198//extracellular matrix organization
novel_circ_002968	ENSBTAG00000033214	ENSBTAG00000013499	0.91166	3	4	3	bta-miR-218|miR-218-x|miR-218-z	1.57816e-05	LHX9	LIM homeobox 9 [Source:VGNC Symbol;Acc:VGNC:30878]	-	-	-	-	GO:0005634//nucleus	GO:0000981//DNA-binding transcription factor activity, RNA polymerase II-specific;GO:0003677//DNA binding;GO:0046872//metal ion binding;GO:1990837//sequence-specific double-stranded DNA binding	GO:0006355//regulation of transcription, DNA-templated;GO:0006357//regulation of transcription by RNA polymerase II;GO:0008283//cell proliferation;GO:0008584//male gonad development;GO:0008585//female gonad development;GO:0035262//gonad morphogenesis
novel_circ_002968	ENSBTAG00000033214	ENSBTAG00000019625	0.965761	3	9	3	bta-miR-218|miR-218-x|miR-218-z	0.000331413	EHHADH	enoyl-CoA hydratase and 3-hydroxyacyl CoA dehydrogenase [Source:VGNC Symbol;Acc:VGNC:53541]	Metabolism;Metabolism;Cellular Processes;Organismal Systems;Metabolism;Metabolism;Metabolism;Metabolism;Metabolism;Metabolism;Metabolism;Metabolism	Global and overview maps;Global and overview maps;Transport and catabolism;Endocrine system;Amino acid metabolism;Global and overview maps;Amino acid metabolism;Amino acid metabolism;Lipid metabolism;Metabolism of other amino acids;Carbohydrate metabolism;Carbohydrate metabolism	ko01100//Metabolic pathways;ko01200//Carbon metabolism;ko04146//Peroxisome;ko03320//PPAR signaling pathway;ko00310//Lysine degradation;ko01212//Fatty acid metabolism;ko00280//Valine, leucine and isoleucine degradation;ko00380//Tryptophan metabolism;ko00071//Fatty acid degradation;ko00410//beta-Alanine metabolism;ko00640//Propanoate metabolism;ko00650//Butanoate metabolism	K07514;K07514;K07514;K07514;K07514;K07514;K07514;K07514;K07514;K07514;K07514;K07514	GO:0005777//peroxisome	GO:0003824//catalytic activity;GO:0003857//3-hydroxyacyl-CoA dehydrogenase activity;GO:0004300//enoyl-CoA hydratase activity;GO:0016491//oxidoreductase activity;GO:0016509//long-chain-3-hydroxyacyl-CoA dehydrogenase activity;GO:0016616//oxidoreductase activity, acting on the CH-OH group of donors, NAD or NADP as acceptor;GO:0019899//enzyme binding;GO:0070403//NAD+ binding	GO:0006629//lipid metabolic process;GO:0006631//fatty acid metabolic process;GO:0006635//fatty acid beta-oxidation;GO:0055114//oxidation-reduction process
novel_circ_003088	ENSBTAG00000014255	ENSBTAG00000001576	0.924894	1	1	1	bta-miR-135b	0.00862069	TMEM140	transmembrane protein 140 [Source:VGNC Symbol;Acc:VGNC:35973]	-	-	-	-	GO:0016020//membrane;GO:0016021//integral component of membrane	-	-
novel_circ_003088	ENSBTAG00000014255	ENSBTAG00000013974	0.916785	1	3	1	bta-miR-135b	0.0258621	TMEM215	transmembrane protein 215 [Source:VGNC Symbol;Acc:VGNC:36037]	-	-	-	-	-	-	-
novel_circ_003110	ENSBTAG00000008307	ENSBTAG00000018397	0.956196	4	1	1	miR-1296-x	0.0344828	HHLA2	HERV-H LTR-associating 2 [Source:VGNC Symbol;Acc:VGNC:29843]	-	-	-	-	GO:0009897//external side of plasma membrane;GO:0016020//membrane;GO:0016021//integral component of membrane	GO:0005102//signaling receptor binding	GO:0001817//regulation of cytokine production;GO:0001819//positive regulation of cytokine production;GO:0031295//T cell costimulation;GO:0042104//positive regulation of activated T cell proliferation;GO:0050852//T cell receptor signaling pathway
novel_circ_003110	ENSBTAG00000008307	ENSBTAG00000019008	0.929652	4	5	2	bta-miR-211|miR-1296-x	0.00868196	FBXL16	F-box and leucine rich repeat protein 16 [Source:VGNC Symbol;Acc:VGNC:52773]	-	-	-	-	GO:0019005//SCF ubiquitin ligase complex	GO:0005515//protein binding	GO:0031146//SCF-dependent proteasomal ubiquitin-dependent protein catabolic process
novel_circ_003110	ENSBTAG00000008307	ENSBTAG00000019291	0.911443	4	1	1	bta-miR-455-3p	0.0344828	GRB14	growth factor receptor bound protein 14 [Source:VGNC Symbol;Acc:VGNC:29630]	-	-	-	-	GO:0005737//cytoplasm;GO:0005886//plasma membrane;GO:0043231//intracellular membrane-bounded organelle	GO:0030674//protein binding, bridging;GO:0030971//receptor tyrosine kinase binding	GO:0007165//signal transduction;GO:0008286//insulin receptor signaling pathway;GO:0046627//negative regulation of insulin receptor signaling pathway
novel_circ_003110	ENSBTAG00000008307	ENSBTAG00000019497	0.90496	4	4	2	bta-miR-302b|bta-miR-455-3p	0.00527147	ILDR2	immunoglobulin like domain containing receptor 2 [Source:VGNC Symbol;Acc:VGNC:30174]	-	-	-	-	GO:0016020//membrane;GO:0016021//integral component of membrane	-	GO:0009749//response to glucose;GO:0030073//insulin secretion;GO:0030154//cell differentiation;GO:0031016//pancreas development;GO:0048873//homeostasis of number of cells within a tissue
novel_circ_003110	ENSBTAG00000008307	ENSBTAG00000049058	0.973743	4	8	2	bta-miR-211|bta-miR-302b	0.0234492	INHBB	inhibin subunit beta B [Source:VGNC Symbol;Acc:VGNC:30201]	Environmental Information Processing;Cellular Processes;Environmental Information Processing	Signaling molecules and interaction;Cellular community - eukaryotes;Signal transduction	ko04060//Cytokine-cytokine receptor interaction;ko04550//Signaling pathways regulating pluripotency of stem cells;ko04350//TGF-beta signaling pathway	K22687;K22687;K22687	GO:0005576//extracellular region;GO:0005615//extracellular space;GO:0048471//perinuclear region of cytoplasm;GO:0071944//cell periphery	GO:0005125//cytokine activity;GO:0005179//hormone activity;GO:0008083//growth factor activity;GO:0042803//protein homodimerization activity	GO:0009267//cellular response to starvation;GO:0009611//response to wounding;GO:0010862//positive regulation of pathway-restricted SMAD protein phosphorylation;GO:0032686//negative regulation of hepatocyte growth factor production;GO:0032869//cellular response to insulin stimulus;GO:0032924//activin receptor signaling pathway;GO:0044320//cellular response to leptin stimulus;GO:0045444//fat cell d…
novel_circ_003251	ENSBTAG00000010542	ENSBTAG00000003827	0.923432	4	7	2	bta-miR-211|miR-211-z	0.0178005	RIMS2	regulating synaptic membrane exocytosis 2 [Source:VGNC Symbol;Acc:VGNC:33972]	Organismal Systems	Endocrine system	ko04911//Insulin secretion	K15297	GO:0016020//membrane	GO:0031267//small GTPase binding	GO:0006887//exocytosis
novel_circ_003417	NA	ENSBTAG00000013499	0.90389	7	4	4	bta-miR-218|miR-218-x|miR-218-z|miR-497-y	4.8881e-06	LHX9	LIM homeobox 9 [Source:VGNC Symbol;Acc:VGNC:30878]	-	-	-	-	GO:0005634//nucleus	GO:0000981//DNA-binding transcription factor activity, RNA polymerase II-specific;GO:0003677//DNA binding;GO:0046872//metal ion binding;GO:1990837//sequence-specific double-stranded DNA binding	GO:0006355//regulation of transcription, DNA-templated;GO:0006357//regulation of transcription by RNA polymerase II;GO:0008283//cell proliferation;GO:0008584//male gonad development;GO:0008585//female gonad development;GO:0035262//gonad morphogenesis
novel_circ_003417	NA	ENSBTAG00000016320	0.909067	7	3	2	bta-miR-455-5p|miR-455-x	0.0091691	LMO1	LIM domain only 1 [Source:VGNC Symbol;Acc:VGNC:30933]	-	-	-	-	GO:0005634//nucleus	GO:0046872//metal ion binding	GO:0000122//negative regulation of transcription by RNA polymerase II;GO:0045944//positive regulation of transcription by RNA polymerase II;GO:0046013//regulation of T cell homeostatic proliferation
novel_circ_003417	NA	ENSBTAG00000019625	0.932075	7	9	3	bta-miR-218|miR-218-x|miR-218-z	0.00984878	EHHADH	enoyl-CoA hydratase and 3-hydroxyacyl CoA dehydrogenase [Source:VGNC Symbol;Acc:VGNC:53541]	Metabolism;Metabolism;Cellular Processes;Organismal Systems;Metabolism;Metabolism;Metabolism;Metabolism;Metabolism;Metabolism;Metabolism;Metabolism	Global and overview maps;Global and overview maps;Transport and catabolism;Endocrine system;Amino acid metabolism;Global and overview maps;Amino acid metabolism;Amino acid metabolism;Lipid metabolism;Metabolism of other amino acids;Carbohydrate metabolism;Carbohydrate metabolism	ko01100//Metabolic pathways;ko01200//Carbon metabolism;ko04146//Peroxisome;ko03320//PPAR signaling pathway;ko00310//Lysine degradation;ko01212//Fatty acid metabolism;ko00280//Valine, leucine and isoleucine degradation;ko00380//Tryptophan metabolism;ko00071//Fatty acid degradation;ko00410//beta-Alanine metabolism;ko00640//Propanoate metabolism;ko00650//Butanoate metabolism	K07514;K07514;K07514;K07514;K07514;K07514;K07514;K07514;K07514;K07514;K07514;K07514	GO:0005777//peroxisome	GO:0003824//catalytic activity;GO:0003857//3-hydroxyacyl-CoA dehydrogenase activity;GO:0004300//enoyl-CoA hydratase activity;GO:0016491//oxidoreductase activity;GO:0016509//long-chain-3-hydroxyacyl-CoA dehydrogenase activity;GO:0016616//oxidoreductase activity, acting on the CH-OH group of donors, NAD or NADP as acceptor;GO:0019899//enzyme binding;GO:0070403//NAD+ binding	GO:0006629//lipid metabolic process;GO:0006631//fatty acid metabolic process;GO:0006635//fatty acid beta-oxidation;GO:0055114//oxidation-reduction process
novel_circ_003441	NA	ENSBTAG00000051600	0.91383	10	4	2	bta-miR-302a|bta-miR-302b	0.0367802	-	XP_032263750.1 A-kinase anchoring protein 7 isoform X3 [Phoca vitulina]	-	-	-	-	GO:0005829//cytosol	GO:0034237//protein kinase A regulatory subunit binding	GO:0010738//regulation of protein kinase A signaling
novel_circ_003520	ENSBTAG00000024021	ENSBTAG00000003776	0.900462	2	1	1	miR-382-x	0.0172414	MSANTD1	Myb/SANT DNA binding domain containing 1 [Source:VGNC Symbol;Acc:VGNC:31688]	-	-	-	-	GO:0016604//nuclear body	-	GO:0045893//positive regulation of transcription, DNA-templated
novel_circ_003520	ENSBTAG00000024021	ENSBTAG00000003827	0.940374	2	7	2	bta-miR-302a|miR-382-x	0.00314843	RIMS2	regulating synaptic membrane exocytosis 2 [Source:VGNC Symbol;Acc:VGNC:33972]	Organismal Systems	Endocrine system	ko04911//Insulin secretion	K15297	GO:0016020//membrane	GO:0031267//small GTPase binding	GO:0006887//exocytosis
novel_circ_003520	ENSBTAG00000024021	ENSBTAG00000010339	0.991295	2	1	1	bta-miR-302a	0.0172414	ABHD11	abhydrolase domain containing 11 [Source:VGNC Symbol;Acc:VGNC:25489]	-	-	-	-	-	GO:0003824//catalytic activity	-
novel_circ_003698	ENSBTAG00000006129	ENSBTAG00000000257	0.954629	1	2	1	miR-211-x	0.0172414	MRAP2	melanocortin 2 receptor accessory protein 2 [Source:VGNC Symbol;Acc:VGNC:31596]	-	-	-	-	GO:0005783//endoplasmic reticulum;GO:0005789//endoplasmic reticulum membrane;GO:0005886//plasma membrane;GO:0016020//membrane;GO:0016021//integral component of membrane	GO:0030545//receptor regulator activity;GO:0031780//corticotropin hormone receptor binding;GO:0031781//type 3 melanocortin receptor binding;GO:0031782//type 4 melanocortin receptor binding;GO:0031783//type 5 melanocortin receptor binding;GO:0042802//identical protein binding;GO:0070996//type 1 melanocortin receptor binding	GO:0006112//energy reserve metabolic process;GO:0007631//feeding behavior;GO:0072659//protein localization to plasma membrane;GO:0097009//energy homeostasis;GO:0106070//regulation of adenylate cyclase-activating G protein-coupled receptor signaling pathway;GO:0106071//positive regulation of adenylate cyclase-activating G protein-coupled receptor signaling pathway;GO:0106072//negative regulation o…
novel_circ_003698	ENSBTAG00000006129	ENSBTAG00000007204	0.948994	1	4	1	miR-211-x	0.0344828	KRT80	keratin 80 [Source:VGNC Symbol;Acc:VGNC:30742]	-	-	-	-	GO:0005882//intermediate filament;GO:0045095//keratin filament;GO:0045111//intermediate filament cytoskeleton	-	-
novel_circ_003788	ENSBTAG00000016504	ENSBTAG00000011381	0.949556	1	2	1	miR-106-x	0.0172414	SLC30A3	solute carrier family 30 member 3 [Source:VGNC Symbol;Acc:VGNC:34808]	-	-	-	-	GO:0005737//cytoplasm;GO:0005770//late endosome;GO:0008021//synaptic vesicle;GO:0016021//integral component of membrane;GO:0030285//integral component of synaptic vesicle membrane;GO:0030672//synaptic vesicle membrane;GO:0043005//neuron projection;GO:0097457//hippocampal mossy fiber;GO:0098686//hippocampal mossy fiber to CA3 synapse;GO:0098978//glutamatergic synapse	GO:0008324//cation transmembrane transporter activity	GO:0006812//cation transport;GO:0051050//positive regulation of transport;GO:0055085//transmembrane transport;GO:0061088//regulation of sequestering of zinc ion;GO:0099180//zinc ion import into synaptic vesicle
novel_circ_003969	ENSBTAG00000043999	ENSBTAG00000002997	0.924774	1	4	1	miR-497-y	0.0344828	ADAMTSL1	ADAMTS like 1 [Source:VGNC Symbol;Acc:VGNC:58359]	-	-	-	-	GO:0031012//extracellular matrix	GO:0004222//metalloendopeptidase activity	GO:0006508//proteolysis;GO:0030198//extracellular matrix organization
novel_circ_003969	ENSBTAG00000043999	ENSBTAG00000012976	0.951417	1	1	1	miR-497-y	0.00862069	WLS	Wnt ligand secretion mediator [Source:VGNC Symbol;Acc:VGNC:36948]	-	-	-	-	GO:0000139//Golgi membrane;GO:0005769//early endosome;GO:0005783//endoplasmic reticulum;GO:0005794//Golgi apparatus;GO:0005802//trans-Golgi network;GO:0005829//cytosol;GO:0005886//plasma membrane;GO:0012505//endomembrane system;GO:0016020//membrane;GO:0016021//integral component of membrane;GO:0031301//integral component of organelle membrane;GO:0031410//cytoplasmic vesicle	GO:0017147//Wnt-protein binding	GO:0006886//intracellular protein transport;GO:0007275//multicellular organism development;GO:0016055//Wnt signaling pathway;GO:0030177//positive regulation of Wnt signaling pathway;GO:0061355//Wnt protein secretion;GO:0061357//positive regulation of Wnt protein secretion;GO:0090263//positive regulation of canonical Wnt signaling pathway
novel_circ_003969	ENSBTAG00000043999	ENSBTAG00000016741	0.96439	1	1	1	miR-497-y	0.00862069	TOX2	TOX high mobility group box family member 2 [Source:VGNC Symbol;Acc:VGNC:55084]	-	-	-	-	GO:0005634//nucleus;GO:0005654//nucleoplasm	GO:0003677//DNA binding;GO:0003713//transcription coactivator activity;GO:0031490//chromatin DNA binding	GO:0006357//regulation of transcription by RNA polymerase II;GO:0045944//positive regulation of transcription by RNA polymerase II
novel_circ_003969	ENSBTAG00000043999	ENSBTAG00000017198	0.96903	1	4	1	miR-497-y	0.0344828	CHRNA4	cholinergic receptor nicotinic alpha 4 subunit [Source:VGNC Symbol;Acc:VGNC:27326]	Environmental Information Processing;Organismal Systems;Human Diseases	Signaling molecules and interaction;Nervous system;Substance dependence	ko04080//Neuroactive ligand-receptor interaction;ko04725//Cholinergic synapse;ko05033//Nicotine addiction	K04806;K04806;K04806	GO:0005886//plasma membrane;GO:0005887//integral component of plasma membrane;GO:0005892//acetylcholine-gated channel complex;GO:0016020//membrane;GO:0016021//integral component of membrane;GO:0030054//cell junction;GO:0043005//neuron projection;GO:0045202//synapse;GO:0045211//postsynaptic membrane	GO:0004888//transmembrane signaling receptor activity;GO:0005216//ion channel activity;GO:0005230//extracellular ligand-gated ion channel activity;GO:0015464//acetylcholine receptor activity;GO:0022848//acetylcholine-gated cation-selective channel activity;GO:0030594//neurotransmitter receptor activity	GO:0001666//response to hypoxia;GO:0006281//DNA repair;GO:0006811//ion transport;GO:0006979//response to oxidative stress;GO:0007165//signal transduction;GO:0007268//chemical synaptic transmission;GO:0007271//synaptic transmission, cholinergic;GO:0034220//ion transmembrane transport;GO:0035094//response to nicotine;GO:0035095//behavioral response to nicotine;GO:0042391//regulation of membrane pot…
novel_circ_004060	ENSBTAG00000009242	ENSBTAG00000003574	0.924505	1	4	1	miR-211-x	0.0344828	SHISAL1	shisa like 1 [Source:VGNC Symbol;Acc:VGNC:30574]	-	-	-	-	GO:0016020//membrane;GO:0016021//integral component of membrane	-	-
novel_circ_004060	ENSBTAG00000009242	ENSBTAG00000005230	0.984366	1	3	1	miR-211-x	0.0258621	SHOX2	short stature homeobox 2 [Source:VGNC Symbol;Acc:VGNC:34606]	-	-	-	-	GO:0005634//nucleus	GO:0000981//DNA-binding transcription factor activity, RNA polymerase II-specific;GO:0003677//DNA binding;GO:1990837//sequence-specific double-stranded DNA binding	GO:0000122//negative regulation of transcription by RNA polymerase II;GO:0001649//osteoblast differentiation;GO:0002027//regulation of heart rate;GO:0002053//positive regulation of mesenchymal cell proliferation;GO:0002062//chondrocyte differentiation;GO:0002063//chondrocyte development;GO:0003163//sinoatrial node development;GO:0003170//heart valve development;GO:0003209//cardiac atrium morphoge…
novel_circ_004060	ENSBTAG00000009242	ENSBTAG00000020318	0.911559	1	5	1	miR-211-x	0.0431035	DBNDD1	dysbindin domain containing 1 [Source:VGNC Symbol;Acc:VGNC:27891]	-	-	-	-	GO:0005737//cytoplasm	-	-
novel_circ_004116	ENSBTAG00000011375	ENSBTAG00000014508	0.939483	1	1	1	bta-miR-135b	0.00862069	FBXO40	F-box protein 40 [Source:VGNC Symbol;Acc:VGNC:28911]	-	-	-	-	GO:0005737//cytoplasm	GO:0005515//protein binding;GO:0008270//zinc ion binding;GO:0046872//metal ion binding;GO:0061630//ubiquitin protein ligase activity	GO:0016567//protein ubiquitination;GO:0042692//muscle cell differentiation
novel_circ_004116	ENSBTAG00000011375	ENSBTAG00000019008	0.925553	1	5	1	bta-miR-135b	0.0431035	FBXL16	F-box and leucine rich repeat protein 16 [Source:VGNC Symbol;Acc:VGNC:52773]	-	-	-	-	GO:0019005//SCF ubiquitin ligase complex	GO:0005515//protein binding	GO:0031146//SCF-dependent proteasomal ubiquitin-dependent protein catabolic process
novel_circ_004152	ENSBTAG00000003684	ENSBTAG00000003749	0.913039	5	2	2	bta-miR-218|miR-218-x	0.00149925	KCNMB4	potassium calcium-activated channel subfamily M regulatory beta subunit 4 [Source:VGNC Symbol;Acc:VGNC:30482]	Environmental Information Processing;Organismal Systems;Organismal Systems	Signal transduction;Circulatory system;Endocrine system	ko04022//cGMP - PKG signaling pathway;ko04270//Vascular smooth muscle contraction;ko04911//Insulin secretion	K04941;K04941;K04941	GO:0005887//integral component of plasma membrane;GO:0008076//voltage-gated potassium channel complex;GO:0016020//membrane;GO:0016021//integral component of membrane	GO:0015269//calcium-activated potassium channel activity;GO:0015459//potassium channel regulator activity	GO:0001508//action potential;GO:0005513//detection of calcium ion;GO:0006813//potassium ion transport;GO:0019228//neuronal action potential;GO:0071805//potassium ion transmembrane transport
novel_circ_004152	ENSBTAG00000003684	ENSBTAG00000003827	0.916361	5	7	3	bta-miR-211|miR-211-x|miR-211-z	0.00130835	RIMS2	regulating synaptic membrane exocytosis 2 [Source:VGNC Symbol;Acc:VGNC:33972]	Organismal Systems	Endocrine system	ko04911//Insulin secretion	K15297	GO:0016020//membrane	GO:0031267//small GTPase binding	GO:0006887//exocytosis
novel_circ_004152	ENSBTAG00000003684	ENSBTAG00000005012	0.914454	5	2	2	bta-miR-211|miR-211-x	0.00149925	HSPH1	heat shock protein family H (Hsp110) member 1 [Source:VGNC Symbol;Acc:VGNC:53817]	Genetic Information Processing	Folding, sorting and degradation	ko04141//Protein processing in endoplasmic reticulum	K09485	GO:0005654//nucleoplasm;GO:0005737//cytoplasm;GO:0005829//cytosol;GO:0005874//microtubule;GO:0032991//protein-containing complex	GO:0000774//adenyl-nucleotide exchange factor activity;GO:0043014//alpha-tubulin binding	GO:0051085//chaperone cofactor-dependent protein refolding
novel_circ_004152	ENSBTAG00000003684	ENSBTAG00000007703	0.959157	5	4	2	bta-miR-218|miR-218-x	0.00868196	NMT2	N-myristoyltransferase 2 [Source:VGNC Symbol;Acc:VGNC:32138]	-	-	-	-	GO:0005737//cytoplasm;GO:0005794//Golgi apparatus;GO:0005829//cytosol;GO:0005886//plasma membrane;GO:0019898//extrinsic component of membrane	GO:0004379//glycylpeptide N-tetradecanoyltransferase activity;GO:0016740//transferase activity;GO:0016746//transferase activity, transferring acyl groups	GO:0006499//N-terminal protein myristoylation;GO:0018008//N-terminal peptidyl-glycine N-myristoylation
novel_circ_004152	ENSBTAG00000003684	ENSBTAG00000019031	0.919746	5	5	4	bta-miR-211|bta-miR-218|miR-211-x|miR-218-x	3.46656e-06	PLPPR4	phospholipid phosphatase related 4 [Source:VGNC Symbol;Acc:VGNC:55657]	-	-	-	-	GO:0005887//integral component of plasma membrane;GO:0016020//membrane;GO:0016021//integral component of membrane;GO:0098978//glutamatergic synapse;GO:0099061//integral component of postsynaptic density membrane	GO:0008195//phosphatidate phosphatase activity;GO:0042577//lipid phosphatase activity	GO:0006644//phospholipid metabolic process;GO:0007165//signal transduction;GO:0007409//axonogenesis;GO:0046839//phospholipid dephosphorylation;GO:0048839//inner ear development
novel_circ_004152	ENSBTAG00000003684	ENSBTAG00000019625	0.90247	5	9	2	bta-miR-218|miR-218-x	0.0476056	EHHADH	enoyl-CoA hydratase and 3-hydroxyacyl CoA dehydrogenase [Source:VGNC Symbol;Acc:VGNC:53541]	Metabolism;Metabolism;Cellular Processes;Organismal Systems;Metabolism;Metabolism;Metabolism;Metabolism;Metabolism;Metabolism;Metabolism;Metabolism	Global and overview maps;Global and overview maps;Transport and catabolism;Endocrine system;Amino acid metabolism;Global and overview maps;Amino acid metabolism;Amino acid metabolism;Lipid metabolism;Metabolism of other amino acids;Carbohydrate metabolism;Carbohydrate metabolism	ko01100//Metabolic pathways;ko01200//Carbon metabolism;ko04146//Peroxisome;ko03320//PPAR signaling pathway;ko00310//Lysine degradation;ko01212//Fatty acid metabolism;ko00280//Valine, leucine and isoleucine degradation;ko00380//Tryptophan metabolism;ko00071//Fatty acid degradation;ko00410//beta-Alanine metabolism;ko00640//Propanoate metabolism;ko00650//Butanoate metabolism	K07514;K07514;K07514;K07514;K07514;K07514;K07514;K07514;K07514;K07514;K07514;K07514	GO:0005777//peroxisome	GO:0003824//catalytic activity;GO:0003857//3-hydroxyacyl-CoA dehydrogenase activity;GO:0004300//enoyl-CoA hydratase activity;GO:0016491//oxidoreductase activity;GO:0016509//long-chain-3-hydroxyacyl-CoA dehydrogenase activity;GO:0016616//oxidoreductase activity, acting on the CH-OH group of donors, NAD or NADP as acceptor;GO:0019899//enzyme binding;GO:0070403//NAD+ binding	GO:0006629//lipid metabolic process;GO:0006631//fatty acid metabolic process;GO:0006635//fatty acid beta-oxidation;GO:0055114//oxidation-reduction process
novel_circ_004152	ENSBTAG00000003684	ENSBTAG00000038700	0.959837	5	3	2	bta-miR-218|miR-218-x	0.00441884	FAM124B	family with sequence similarity 124 member B [Source:VGNC Symbol;Acc:VGNC:56107]	-	-	-	-	GO:0005654//nucleoplasm;GO:0005739//mitochondrion	-	-
novel_circ_004152	ENSBTAG00000003684	ENSBTAG00000046332	0.910833	5	3	3	bta-miR-211|miR-211-x|miR-211-z	3.9454e-05	ACTA1	actin alpha 1, skeletal muscle [Source:VGNC Symbol;Acc:VGNC:25573]	-	-	-	-	GO:0001725//stress fiber;GO:0005865//striated muscle thin filament;GO:0005884//actin filament;GO:0015629//actin cytoskeleton;GO:0030017//sarcomere	-	GO:0030240//skeletal muscle thin filament assembly;GO:0048741//skeletal muscle fiber development
novel_circ_004178	ENSBTAG00000017679	ENSBTAG00000003776	0.906826	1	1	1	miR-382-x	0.00862069	MSANTD1	Myb/SANT DNA binding domain containing 1 [Source:VGNC Symbol;Acc:VGNC:31688]	-	-	-	-	GO:0016604//nuclear body	-	GO:0045893//positive regulation of transcription, DNA-templated
novel_circ_004494	ENSBTAG00000021675	ENSBTAG00000009997	0.948926	6	3	2	miR-19-z|novel-m0085-5p	0.00658881	ANO1	anoctamin 1 [Source:VGNC Symbol;Acc:VGNC:50077]	-	-	-	-	GO:0005654//nucleoplasm;GO:0005886//plasma membrane;GO:0016020//membrane;GO:0016021//integral component of membrane;GO:0016324//apical plasma membrane	GO:0005227//calcium activated cation channel activity;GO:0005229//intracellular calcium activated chloride channel activity;GO:0005254//chloride channel activity;GO:0015111//iodide transmembrane transporter activity;GO:0046983//protein dimerization activity	GO:0006812//cation transport;GO:0006821//chloride transport;GO:0015705//iodide transport;GO:0034605//cellular response to heat;GO:0035774//positive regulation of insulin secretion involved in cellular response to glucose stimulus;GO:0055085//transmembrane transport;GO:0098655//cation transmembrane transport;GO:1902476//chloride transmembrane transport
novel_circ_004733	ENSBTAG00000020696	ENSBTAG00000017866	0.992866	7	5	2	bta-miR-200b|bta-miR-200c	0.0287953	CD36	CD36 molecule [Source:NCBI gene (formerly Entrezgene);Acc:281052]	Cellular Processes;Organismal Systems;Environmental Information Processing;Human Diseases;Human Diseases;Environmental Information Processing;Organismal Systems;Organismal Systems;Organismal Systems;Organismal Systems	Transport and catabolism;Immune system;Signal transduction;Infectious diseases;Endocrine and metabolic diseases;Signaling molecules and interaction;Endocrine system;Endocrine system;Digestive system;Digestive system	ko04145//Phagosome;ko04640//Hematopoietic cell lineage;ko04152//AMPK signaling pathway;ko05144//Malaria;ko04931//Insulin resistance;ko04512//ECM-receptor interaction;ko03320//PPAR signaling pathway;ko04920//Adipocytokine signaling pathway;ko04979//Cholesterol metabolism;ko04975//Fat digestion and absorption	K06259;K06259;K06259;K06259;K06259;K06259;K06259;K06259;K06259;K06259	GO:0005794//Golgi apparatus;GO:0005886//plasma membrane;GO:0016020//membrane;GO:0016021//integral component of membrane;GO:0016324//apical plasma membrane	-	GO:0006955//immune response;GO:0007155//cell adhesion;GO:0007166//cell surface receptor signaling pathway
novel_circ_005188	ENSBTAG00000013047	ENSBTAG00000007514	0.919037	7	3	2	miR-10926-z|miR-34-x	0.0091691	CPNE5	copine 5 [Source:VGNC Symbol;Acc:VGNC:27661]	-	-	-	-	GO:0005886//plasma membrane;GO:0043005//neuron projection;GO:0043025//neuronal cell body	GO:0005544//calcium-dependent phospholipid binding	GO:0071277//cellular response to calcium ion;GO:1903861//positive regulation of dendrite extension
novel_circ_005188	ENSBTAG00000013047	ENSBTAG00000013499	0.909573	7	4	3	bta-miR-218|miR-218-x|miR-497-y	0.000537691	LHX9	LIM homeobox 9 [Source:VGNC Symbol;Acc:VGNC:30878]	-	-	-	-	GO:0005634//nucleus	GO:0000981//DNA-binding transcription factor activity, RNA polymerase II-specific;GO:0003677//DNA binding;GO:0046872//metal ion binding;GO:1990837//sequence-specific double-stranded DNA binding	GO:0006355//regulation of transcription, DNA-templated;GO:0006357//regulation of transcription by RNA polymerase II;GO:0008283//cell proliferation;GO:0008584//male gonad development;GO:0008585//female gonad development;GO:0035262//gonad morphogenesis
novel_circ_005188	ENSBTAG00000013047	ENSBTAG00000013974	0.971847	7	3	2	miR-10926-z|miR-497-y	0.0091691	TMEM215	transmembrane protein 215 [Source:VGNC Symbol;Acc:VGNC:36037]	-	-	-	-	-	-	-
novel_circ_005221	ENSBTAG00000022169	ENSBTAG00000050359	0.975387	2	1	1	miR-485-y	0.0172414	-	XP_010861487.1 PREDICTED: zinc finger protein 616-like isoform X2 [Bison bison bison]	Human Diseases	Infectious diseases	ko05168//Herpes simplex infection	K09228	-	GO:0000978//RNA polymerase II proximal promoter sequence-specific DNA binding;GO:0000981//DNA-binding transcription factor activity, RNA polymerase II-specific	GO:0006355//regulation of transcription, DNA-templated;GO:0006357//regulation of transcription by RNA polymerase II
novel_circ_005308	ENSBTAG00000018347	ENSBTAG00000005745	0.916321	2	1	1	bta-miR-507-3p	0.0172414	HPSE	heparanase [Source:VGNC Symbol;Acc:VGNC:29948]	Metabolism;Human Diseases;Metabolism	Global and overview maps;Cancers;Glycan biosynthesis and metabolism	ko01100//Metabolic pathways;ko05205//Proteoglycans in cancer;ko00531//Glycosaminoglycan degradation	K07964;K07964;K07964	GO:0005634//nucleus;GO:0005654//nucleoplasm;GO:0005764//lysosome;GO:0016020//membrane;GO:0043231//intracellular membrane-bounded organelle;GO:0045121//membrane raft	GO:0016798//hydrolase activity, acting on glycosyl bonds;GO:0030305//heparanase activity;GO:0045545//syndecan binding	GO:0007160//cell-matrix adhesion;GO:0010575//positive regulation of vascular endothelial growth factor production;GO:0030194//positive regulation of blood coagulation;GO:0030200//heparan sulfate proteoglycan catabolic process;GO:0033690//positive regulation of osteoblast proliferation;GO:0042060//wound healing;GO:0051797//regulation of hair follicle development;GO:0051798//positive regulation of …
novel_circ_005308	ENSBTAG00000018347	ENSBTAG00000034147	0.979715	2	1	1	miR-11977-z	0.0172414	OLFML2B	olfactomedin like 2B [Source:VGNC Symbol;Acc:VGNC:32423]	-	-	-	-	GO:0031012//extracellular matrix	GO:0042802//identical protein binding;GO:0050840//extracellular matrix binding	GO:0030198//extracellular matrix organization
novel_circ_005345	ENSBTAG00000015559	ENSBTAG00000008921	0.946523	1	2	1	bta-miR-135b	0.0172414	NEXN	nexilin F-actin binding protein [Source:VGNC Symbol;Acc:VGNC:32025]	-	-	-	-	GO:0005886//plasma membrane;GO:0015629//actin cytoskeleton;GO:0030424//axon	GO:0005515//protein binding;GO:0008307//structural constituent of muscle;GO:0051015//actin filament binding;GO:0098632//cell-cell adhesion mediator activity	GO:0007155//cell adhesion;GO:0007156//homophilic cell adhesion via plasma membrane adhesion molecules;GO:0007411//axon guidance;GO:0030334//regulation of cell migration;GO:0051493//regulation of cytoskeleton organization;GO:0070593//dendrite self-avoidance
novel_circ_005345	ENSBTAG00000015559	ENSBTAG00000014530	0.908595	1	2	1	bta-miR-135b	0.0172414	NTNG1	netrin G1 [Source:VGNC Symbol;Acc:VGNC:50086]	Environmental Information Processing;Organismal Systems	Signaling molecules and interaction;Development	ko04514//Cell adhesion molecules (CAMs);ko04360//Axon guidance	K07522;K07522	GO:0005886//plasma membrane;GO:0043256//laminin complex	GO:0050839//cell adhesion molecule binding;GO:0098632//cell-cell adhesion mediator activity	GO:0009887//animal organ morphogenesis;GO:0009888//tissue development;GO:0016477//cell migration;GO:0034446//substrate adhesion-dependent cell spreading;GO:0070831//basement membrane assembly;GO:0099560//synaptic membrane adhesion
novel_circ_005345	ENSBTAG00000015559	ENSBTAG00000017802	0.954277	1	4	1	bta-miR-135b	0.0344828	THRB	thyroid hormone receptor beta [Source:VGNC Symbol;Acc:VGNC:35847]	Environmental Information Processing;Organismal Systems	Signaling molecules and interaction;Endocrine system	ko04080//Neuroactive ligand-receptor interaction;ko04919//Thyroid hormone signaling pathway	K08362;K08362	GO:0005634//nucleus;GO:0016604//nuclear body	GO:0000978//RNA polymerase II proximal promoter sequence-specific DNA binding;GO:0001225//RNA polymerase II transcription coactivator binding;GO:0003677//DNA binding;GO:0003682//chromatin binding;GO:0003700//DNA-binding transcription factor activity;GO:0004879//nuclear receptor activity;GO:0008270//zinc ion binding;GO:0019899//enzyme binding;GO:0031490//chromatin DNA binding;GO:0043565//sequence-…	GO:0000122//negative regulation of transcription by RNA polymerase II;GO:0002154//thyroid hormone mediated signaling pathway;GO:0006355//regulation of transcription, DNA-templated;GO:0006357//regulation of transcription by RNA polymerase II;GO:0007605//sensory perception of sound;GO:0007621//negative regulation of female receptivity;GO:0008016//regulation of heart contraction;GO:0008050//female c…
novel_circ_005345	ENSBTAG00000015559	ENSBTAG00000019008	0.901719	1	5	1	bta-miR-135b	0.0431035	FBXL16	F-box and leucine rich repeat protein 16 [Source:VGNC Symbol;Acc:VGNC:52773]	-	-	-	-	GO:0019005//SCF ubiquitin ligase complex	GO:0005515//protein binding	GO:0031146//SCF-dependent proteasomal ubiquitin-dependent protein catabolic process
novel_circ_005483	ENSBTAG00000005523	ENSBTAG00000005104	0.901877	4	3	2	bta-miR-218|miR-218-x	0.00266709	MGAT5B	alpha-1,6-mannosylglycoprotein 6-beta-N-acetylglucosaminyltransferase B [Source:VGNC Symbol;Acc:VGNC:55847]	Metabolism;Metabolism;Metabolism	Global and overview maps;Glycan biosynthesis and metabolism;Glycan biosynthesis and metabolism	ko01100//Metabolic pathways;ko00510//N-Glycan biosynthesis;ko00515//Mannose type O-glycan biosyntheis	K09661;K09661;K09661	GO:0000139//Golgi membrane;GO:0005794//Golgi apparatus;GO:0016020//membrane;GO:0016021//integral component of membrane	GO:0016740//transferase activity;GO:0016757//transferase activity, transferring glycosyl groups;GO:0030144//alpha-1,6-mannosylglycoprotein 6-beta-N-acetylglucosaminyltransferase activity;GO:0030145//manganese ion binding	GO:0006486//protein glycosylation;GO:0006487//protein N-linked glycosylation;GO:0018215//protein phosphopantetheinylation;GO:0018242//protein O-linked glycosylation via serine
novel_circ_005551	ENSBTAG00000021452	ENSBTAG00000001576	0.910974	2	1	1	bta-miR-135b	0.0172414	TMEM140	transmembrane protein 140 [Source:VGNC Symbol;Acc:VGNC:35973]	-	-	-	-	GO:0016020//membrane;GO:0016021//integral component of membrane	-	-
novel_circ_005575	ENSBTAG00000012103	ENSBTAG00000007204	0.969252	1	4	1	miR-8549-z	0.0344828	KRT80	keratin 80 [Source:VGNC Symbol;Acc:VGNC:30742]	-	-	-	-	GO:0005882//intermediate filament;GO:0045095//keratin filament;GO:0045111//intermediate filament cytoskeleton	-	-
novel_circ_005639	ENSBTAG00000006945	ENSBTAG00000013974	0.925455	1	3	1	miR-497-y	0.0258621	TMEM215	transmembrane protein 215 [Source:VGNC Symbol;Acc:VGNC:36037]	-	-	-	-	-	-	-
novel_circ_005691	ENSBTAG00000054948	ENSBTAG00000018431	0.948018	28	4	4	bta-miR-200a|bta-miR-7865|novel-m0011-5p|novel-m0101-3p	0.00285954	NAV2	neuron navigator 2 [Source:VGNC Symbol;Acc:VGNC:31891]	-	-	-	-	GO:0005614//interstitial matrix;GO:0005654//nucleoplasm;GO:0031012//extracellular matrix	GO:0005515//protein binding;GO:0008201//heparin binding;GO:0043138//3'-5' DNA helicase activity	GO:0003025//regulation of systemic arterial blood pressure by baroreceptor feedback;GO:0007399//nervous system development;GO:0007605//sensory perception of sound;GO:0007608//sensory perception of smell;GO:0007626//locomotory behavior;GO:0021554//optic nerve development;GO:0021563//glossopharyngeal nerve development;GO:0021564//vagus nerve development;GO:0022008//neurogenesis
novel_circ_005767	ENSBTAG00000003338	ENSBTAG00000017390	0.961217	3	1	1	miR-11977-z	0.0258621	LGI2	leucine rich repeat LGI family member 2 [Source:VGNC Symbol;Acc:VGNC:30857]	-	-	-	-	GO:0005576//extracellular region	GO:0005515//protein binding	GO:1904862//inhibitory synapse assembly
novel_circ_005963	ENSBTAG00000033680	ENSBTAG00000000914	0.930179	19	15	9	bta-miR-139|bta-miR-200c|bta-miR-7865|miR-11977-z|miR-139-y|miR-139-z|miR-146-y|novel-m0011-5p|novel-m0101-3p	3.54216e-05	OPRK1	opioid receptor kappa 1 [Source:VGNC Symbol;Acc:VGNC:32439]	Environmental Information Processing	Signaling molecules and interaction	ko04080//Neuroactive ligand-receptor interaction	K04214	GO:0005654//nucleoplasm;GO:0005829//cytosol;GO:0005886//plasma membrane;GO:0005887//integral component of plasma membrane;GO:0016021//integral component of membrane	GO:0004930//G protein-coupled receptor activity;GO:0004985//opioid receptor activity;GO:0038048//dynorphin receptor activity	GO:0006955//immune response;GO:0007186//G protein-coupled receptor signaling pathway;GO:0031635//adenylate cyclase-inhibiting opioid receptor signaling pathway;GO:0038003//opioid receptor signaling pathway;GO:0051607//defense response to virus
novel_circ_005963	ENSBTAG00000033680	ENSBTAG00000019870	0.986422	19	10	5	bta-miR-12028|bta-miR-141|bta-miR-200c|miR-141-y|novel-m0011-5p	0.0104346	SLC14A1	solute carrier family 14 member 1 [Source:VGNC Symbol;Acc:VGNC:53653]	-	-	-	-	GO:0005886//plasma membrane;GO:0005887//integral component of plasma membrane;GO:0016020//membrane;GO:0016021//integral component of membrane	GO:0005372//water transmembrane transporter activity;GO:0015204//urea transmembrane transporter activity;GO:0015265//urea channel activity;GO:0042802//identical protein binding	GO:0006833//water transport;GO:0015840//urea transport;GO:0071918//urea transmembrane transport
novel_circ_006092	ENSBTAG00000020696	ENSBTAG00000000910	0.978805	11	3	2	bta-miR-33a|miR-382-x	0.0234356	SLC6A7	solute carrier family 6 member 7 [Source:VGNC Symbol;Acc:VGNC:34923]	Organismal Systems	Nervous system	ko04721//Synaptic vesicle cycle	K05040	GO:0005887//integral component of plasma membrane;GO:0016020//membrane;GO:0016021//integral component of membrane	GO:0015193//L-proline transmembrane transporter activity;GO:0015293//symporter activity	GO:0035524//proline transmembrane transport;GO:0035725//sodium ion transmembrane transport
novel_circ_006092	ENSBTAG00000020696	ENSBTAG00000002640	0.977219	11	2	2	bta-miR-211|miR-211-x	0.00824588	KALRN	kalirin RhoGEF kinase [Source:VGNC Symbol;Acc:VGNC:30389]	-	-	-	-	-	GO:0000166//nucleotide binding;GO:0005085//guanyl-nucleotide exchange factor activity;GO:0005515//protein binding	GO:0007411//axon guidance;GO:0007417//central nervous system development;GO:0050790//regulation of catalytic activity
novel_circ_006092	ENSBTAG00000020696	ENSBTAG00000003574	0.98085	11	4	2	bta-miR-211|miR-211-x	0.0444056	SHISAL1	shisa like 1 [Source:VGNC Symbol;Acc:VGNC:30574]	-	-	-	-	GO:0016020//membrane;GO:0016021//integral component of membrane	-	-
novel_circ_006092	ENSBTAG00000020696	ENSBTAG00000003827	0.983485	11	7	4	bta-miR-211|bta-miR-302a|miR-211-x|miR-382-x	0.00138187	RIMS2	regulating synaptic membrane exocytosis 2 [Source:VGNC Symbol;Acc:VGNC:33972]	Organismal Systems	Endocrine system	ko04911//Insulin secretion	K15297	GO:0016020//membrane	GO:0031267//small GTPase binding	GO:0006887//exocytosis
novel_circ_006092	ENSBTAG00000020696	ENSBTAG00000005012	0.993671	11	2	2	bta-miR-211|miR-211-x	0.00824588	HSPH1	heat shock protein family H (Hsp110) member 1 [Source:VGNC Symbol;Acc:VGNC:53817]	Genetic Information Processing	Folding, sorting and degradation	ko04141//Protein processing in endoplasmic reticulum	K09485	GO:0005654//nucleoplasm;GO:0005737//cytoplasm;GO:0005829//cytosol;GO:0005874//microtubule;GO:0032991//protein-containing complex	GO:0000774//adenyl-nucleotide exchange factor activity;GO:0043014//alpha-tubulin binding	GO:0051085//chaperone cofactor-dependent protein refolding
novel_circ_006092	ENSBTAG00000020696	ENSBTAG00000005230	0.933536	11	3	2	bta-miR-211|miR-211-x	0.0234356	SHOX2	short stature homeobox 2 [Source:VGNC Symbol;Acc:VGNC:34606]	-	-	-	-	GO:0005634//nucleus	GO:0000981//DNA-binding transcription factor activity, RNA polymerase II-specific;GO:0003677//DNA binding;GO:1990837//sequence-specific double-stranded DNA binding	GO:0000122//negative regulation of transcription by RNA polymerase II;GO:0001649//osteoblast differentiation;GO:0002027//regulation of heart rate;GO:0002053//positive regulation of mesenchymal cell proliferation;GO:0002062//chondrocyte differentiation;GO:0002063//chondrocyte development;GO:0003163//sinoatrial node development;GO:0003170//heart valve development;GO:0003209//cardiac atrium morphoge…
novel_circ_006092	ENSBTAG00000020696	ENSBTAG00000007703	0.971313	11	4	2	bta-miR-302b|miR-382-x	0.0444056	NMT2	N-myristoyltransferase 2 [Source:VGNC Symbol;Acc:VGNC:32138]	-	-	-	-	GO:0005737//cytoplasm;GO:0005794//Golgi apparatus;GO:0005829//cytosol;GO:0005886//plasma membrane;GO:0019898//extrinsic component of membrane	GO:0004379//glycylpeptide N-tetradecanoyltransferase activity;GO:0016740//transferase activity;GO:0016746//transferase activity, transferring acyl groups	GO:0006499//N-terminal protein myristoylation;GO:0018008//N-terminal peptidyl-glycine N-myristoylation
novel_circ_006092	ENSBTAG00000020696	ENSBTAG00000008571	0.95441	11	3	2	bta-miR-302b|miR-382-x	0.0234356	CUX2	cut like homeobox 2 [Source:VGNC Symbol;Acc:VGNC:27840]	-	-	-	-	GO:0005634//nucleus	GO:0000977//RNA polymerase II regulatory region sequence-specific DNA binding;GO:0000978//RNA polymerase II proximal promoter sequence-specific DNA binding;GO:0000981//DNA-binding transcription factor activity, RNA polymerase II-specific;GO:0001227//DNA-binding transcription repressor activity, RNA polymerase II-specific;GO:0003677//DNA binding;GO:0043565//sequence-specific DNA binding;GO:1990837…	GO:0000122//negative regulation of transcription by RNA polymerase II;GO:0006355//regulation of transcription, DNA-templated;GO:0006357//regulation of transcription by RNA polymerase II;GO:0007614//short-term memory;GO:0010628//positive regulation of gene expression;GO:0045892//negative regulation of transcription, DNA-templated;GO:0050775//positive regulation of dendrite morphogenesis;GO:0050890…
novel_circ_006092	ENSBTAG00000020696	ENSBTAG00000014194	0.979977	11	11	5	bta-miR-302b|miR-101-x|miR-10926-z|miR-211-x|miR-382-x	0.00100467	ADARB2	adenosine deaminase RNA specific B2 (inactive) [Source:NCBI gene (formerly Entrezgene);Acc:524061]	-	-	-	-	GO:0005730//nucleolus;GO:0005737//cytoplasm	GO:0003723//RNA binding;GO:0003725//double-stranded RNA binding;GO:0003726//double-stranded RNA adenosine deaminase activity;GO:0004000//adenosine deaminase activity;GO:0008251//tRNA-specific adenosine deaminase activity	GO:0006382//adenosine to inosine editing;GO:0006396//RNA processing
novel_circ_006092	ENSBTAG00000020696	ENSBTAG00000014384	0.990157	11	3	2	bta-miR-455-3p|miR-382-x	0.0234356	ZDHHC22	zinc finger DHHC-type palmitoyltransferase 22 [Source:VGNC Symbol;Acc:VGNC:37138]	-	-	-	-	GO:0005783//endoplasmic reticulum;GO:0005794//Golgi apparatus;GO:0005886//plasma membrane;GO:0016020//membrane;GO:0016021//integral component of membrane	GO:0016409//palmitoyltransferase activity;GO:0016740//transferase activity;GO:0016746//transferase activity, transferring acyl groups;GO:0019706//protein-cysteine S-palmitoyltransferase activity	GO:0006612//protein targeting to membrane;GO:0018215//protein phosphopantetheinylation;GO:0018230//peptidyl-L-cysteine S-palmitoylation;GO:0018345//protein palmitoylation;GO:0072659//protein localization to plasma membrane
novel_circ_006092	ENSBTAG00000020696	ENSBTAG00000017802	0.984145	11	4	2	bta-miR-211|miR-211-x	0.0444056	THRB	thyroid hormone receptor beta [Source:VGNC Symbol;Acc:VGNC:35847]	Environmental Information Processing;Organismal Systems	Signaling molecules and interaction;Endocrine system	ko04080//Neuroactive ligand-receptor interaction;ko04919//Thyroid hormone signaling pathway	K08362;K08362	GO:0005634//nucleus;GO:0016604//nuclear body	GO:0000978//RNA polymerase II proximal promoter sequence-specific DNA binding;GO:0001225//RNA polymerase II transcription coactivator binding;GO:0003677//DNA binding;GO:0003682//chromatin binding;GO:0003700//DNA-binding transcription factor activity;GO:0004879//nuclear receptor activity;GO:0008270//zinc ion binding;GO:0019899//enzyme binding;GO:0031490//chromatin DNA binding;GO:0043565//sequence-…	GO:0000122//negative regulation of transcription by RNA polymerase II;GO:0002154//thyroid hormone mediated signaling pathway;GO:0006355//regulation of transcription, DNA-templated;GO:0006357//regulation of transcription by RNA polymerase II;GO:0007605//sensory perception of sound;GO:0007621//negative regulation of female receptivity;GO:0008016//regulation of heart contraction;GO:0008050//female c…
novel_circ_006092	ENSBTAG00000020696	ENSBTAG00000019008	0.982933	11	5	3	bta-miR-211|miR-10926-z|miR-211-x	0.00583587	FBXL16	F-box and leucine rich repeat protein 16 [Source:VGNC Symbol;Acc:VGNC:52773]	-	-	-	-	GO:0019005//SCF ubiquitin ligase complex	GO:0005515//protein binding	GO:0031146//SCF-dependent proteasomal ubiquitin-dependent protein catabolic process
novel_circ_006092	ENSBTAG00000020696	ENSBTAG00000019031	0.93206	11	5	3	bta-miR-211|bta-miR-33a|miR-211-x	0.00583587	PLPPR4	phospholipid phosphatase related 4 [Source:VGNC Symbol;Acc:VGNC:55657]	-	-	-	-	GO:0005887//integral component of plasma membrane;GO:0016020//membrane;GO:0016021//integral component of membrane;GO:0098978//glutamatergic synapse;GO:0099061//integral component of postsynaptic density membrane	GO:0008195//phosphatidate phosphatase activity;GO:0042577//lipid phosphatase activity	GO:0006644//phospholipid metabolic process;GO:0007165//signal transduction;GO:0007409//axonogenesis;GO:0046839//phospholipid dephosphorylation;GO:0048839//inner ear development
novel_circ_006092	ENSBTAG00000020696	ENSBTAG00000019497	0.97379	11	4	2	bta-miR-302b|bta-miR-455-3p	0.0444056	ILDR2	immunoglobulin like domain containing receptor 2 [Source:VGNC Symbol;Acc:VGNC:30174]	-	-	-	-	GO:0016020//membrane;GO:0016021//integral component of membrane	-	GO:0009749//response to glucose;GO:0030073//insulin secretion;GO:0030154//cell differentiation;GO:0031016//pancreas development;GO:0048873//homeostasis of number of cells within a tissue
novel_circ_006092	ENSBTAG00000020696	ENSBTAG00000021574	0.968716	11	4	2	bta-miR-455-3p|miR-382-x	0.0444056	TCF7L2	transcription factor 7 like 2 [Source:VGNC Symbol;Acc:VGNC:55976]	Human Diseases;Human Diseases;Human Diseases;Human Diseases;Environmental Information Processing;Environmental Information Processing;Human Diseases;Human Diseases;Human Diseases;Organismal Systems;Human Diseases;Human Diseases;Human Diseases;Cellular Processes;Human Diseases;Human Diseases;Human Diseases;Human Diseases	Cancers;Infectious diseases;Infectious diseases;Cancers;Signal transduction;Signal transduction;Endocrine and metabolic diseases;Cancers;Cancers;Endocrine system;Cancers;Cancers;Cardiovascular diseases;Cellular community - eukaryotes;Cancers;Cancers;Cancers;Cancers	ko05200//Pathways in cancer;ko05165//Human papillomavirus infection;ko05132//Salmonella infection;ko05225//Hepatocellular carcinoma;ko04310//Wnt signaling pathway;ko04390//Hippo signaling pathway;ko04934//Cushing syndrome;ko05226//Gastric cancer;ko05224//Breast cancer;ko04916//Melanogenesis;ko05215//Prostate cancer;ko05210//Colorectal cancer;ko05412//Arrhythmogenic right ventricular cardiomyopath…	K04491;K04491;K04491;K04491;K04491;K04491;K04491;K04491;K04491;K04491;K04491;K04491;K04491;K04491;K04491;K04491;K04491;K04491	GO:0000785//chromatin;GO:0005634//nucleus;GO:0005654//nucleoplasm;GO:0032993//protein-DNA complex;GO:0070369//beta-catenin-TCF7L2 complex;GO:0071664//catenin-TCF7L2 complex;GO:1990907//beta-catenin-TCF complex	GO:0000976//transcription regulatory region sequence-specific DNA binding;GO:0000978//RNA polymerase II proximal promoter sequence-specific DNA binding;GO:0000981//DNA-binding transcription factor activity, RNA polymerase II-specific;GO:0001103//RNA polymerase II repressing transcription factor binding;GO:0003677//DNA binding;GO:0003700//DNA-binding transcription factor activity;GO:0008013//beta-…	GO:0000122//negative regulation of transcription by RNA polymerase II;GO:0001568//blood vessel development;GO:0006357//regulation of transcription by RNA polymerase II;GO:0007050//cell cycle arrest;GO:0010909//positive regulation of heparan sulfate proteoglycan biosynthetic process;GO:0016055//Wnt signaling pathway;GO:0032024//positive regulation of insulin secretion;GO:0032092//positive regulati…
novel_circ_006092	ENSBTAG00000020696	ENSBTAG00000046332	0.918795	11	3	2	bta-miR-211|miR-211-x	0.0234356	ACTA1	actin alpha 1, skeletal muscle [Source:VGNC Symbol;Acc:VGNC:25573]	-	-	-	-	GO:0001725//stress fiber;GO:0005865//striated muscle thin filament;GO:0005884//actin filament;GO:0015629//actin cytoskeleton;GO:0030017//sarcomere	-	GO:0030240//skeletal muscle thin filament assembly;GO:0048741//skeletal muscle fiber development
novel_circ_006092	ENSBTAG00000020696	ENSBTAG00000049058	0.998091	11	8	5	bta-miR-211|bta-miR-302b|bta-miR-33a|miR-211-x|miR-26-z	0.000140349	INHBB	inhibin subunit beta B [Source:VGNC Symbol;Acc:VGNC:30201]	Environmental Information Processing;Cellular Processes;Environmental Information Processing	Signaling molecules and interaction;Cellular community - eukaryotes;Signal transduction	ko04060//Cytokine-cytokine receptor interaction;ko04550//Signaling pathways regulating pluripotency of stem cells;ko04350//TGF-beta signaling pathway	K22687;K22687;K22687	GO:0005576//extracellular region;GO:0005615//extracellular space;GO:0048471//perinuclear region of cytoplasm;GO:0071944//cell periphery	GO:0005125//cytokine activity;GO:0005179//hormone activity;GO:0008083//growth factor activity;GO:0042803//protein homodimerization activity	GO:0009267//cellular response to starvation;GO:0009611//response to wounding;GO:0010862//positive regulation of pathway-restricted SMAD protein phosphorylation;GO:0032686//negative regulation of hepatocyte growth factor production;GO:0032869//cellular response to insulin stimulus;GO:0032924//activin receptor signaling pathway;GO:0044320//cellular response to leptin stimulus;GO:0045444//fat cell d…
novel_circ_006092	ENSBTAG00000020696	ENSBTAG00000051600	0.984288	11	4	2	bta-miR-302a|bta-miR-302b	0.0444056	-	XP_032263750.1 A-kinase anchoring protein 7 isoform X3 [Phoca vitulina]	-	-	-	-	GO:0005829//cytosol	GO:0034237//protein kinase A regulatory subunit binding	GO:0010738//regulation of protein kinase A signaling
novel_circ_006424	ENSBTAG00000003051	ENSBTAG00000004720	0.968167	1	2	1	miR-26-z	0.0172414	SULF1	sulfatase 1 [Source:VGNC Symbol;Acc:VGNC:53880]	-	-	-	-	GO:0005615//extracellular space;GO:0005783//endoplasmic reticulum;GO:0005794//Golgi apparatus;GO:0005795//Golgi stack;GO:0005886//plasma membrane;GO:0009986//cell surface;GO:0045121//membrane raft	GO:0003824//catalytic activity;GO:0004065//arylsulfatase activity;GO:0005509//calcium ion binding;GO:0008449//N-acetylglucosamine-6-sulfatase activity;GO:0008484//sulfuric ester hydrolase activity;GO:0016787//hydrolase activity;GO:0046872//metal ion binding	GO:0001502//cartilage condensation;GO:0001822//kidney development;GO:0001937//negative regulation of endothelial cell proliferation;GO:0002063//chondrocyte development;GO:0003094//glomerular filtration;GO:0007155//cell adhesion;GO:0010575//positive regulation of vascular endothelial growth factor production;GO:0014846//esophagus smooth muscle contraction;GO:0016525//negative regulation of angioge…
novel_circ_006461	ENSBTAG00000030581	ENSBTAG00000011381	0.945132	1	2	1	miR-106-x	0.0172414	SLC30A3	solute carrier family 30 member 3 [Source:VGNC Symbol;Acc:VGNC:34808]	-	-	-	-	GO:0005737//cytoplasm;GO:0005770//late endosome;GO:0008021//synaptic vesicle;GO:0016021//integral component of membrane;GO:0030285//integral component of synaptic vesicle membrane;GO:0030672//synaptic vesicle membrane;GO:0043005//neuron projection;GO:0097457//hippocampal mossy fiber;GO:0098686//hippocampal mossy fiber to CA3 synapse;GO:0098978//glutamatergic synapse	GO:0008324//cation transmembrane transporter activity	GO:0006812//cation transport;GO:0051050//positive regulation of transport;GO:0055085//transmembrane transport;GO:0061088//regulation of sequestering of zinc ion;GO:0099180//zinc ion import into synaptic vesicle
novel_circ_006461	ENSBTAG00000030581	ENSBTAG00000013689	0.95834	1	2	1	miR-106-x	0.0172414	MCTP2	multiple C2 and transmembrane domain containing 2 [Source:VGNC Symbol;Acc:VGNC:31324]	-	-	-	-	GO:0005654//nucleoplasm;GO:0005829//cytosol;GO:0016020//membrane;GO:0016021//integral component of membrane;GO:0030672//synaptic vesicle membrane	GO:0005509//calcium ion binding	GO:0046928//regulation of neurotransmitter secretion
novel_circ_006615	ENSBTAG00000030994	ENSBTAG00000014530	0.917594	6	2	2	bta-miR-135b|bta-miR-144	0.00224888	NTNG1	netrin G1 [Source:VGNC Symbol;Acc:VGNC:50086]	Environmental Information Processing;Organismal Systems	Signaling molecules and interaction;Development	ko04514//Cell adhesion molecules (CAMs);ko04360//Axon guidance	K07522;K07522	GO:0005886//plasma membrane;GO:0043256//laminin complex	GO:0050839//cell adhesion molecule binding;GO:0098632//cell-cell adhesion mediator activity	GO:0009887//animal organ morphogenesis;GO:0009888//tissue development;GO:0016477//cell migration;GO:0034446//substrate adhesion-dependent cell spreading;GO:0070831//basement membrane assembly;GO:0099560//synaptic membrane adhesion
novel_circ_006615	ENSBTAG00000030994	ENSBTAG00000019625	0.907367	6	9	3	bta-miR-135b|bta-miR-144|miR-101-x	0.00586439	EHHADH	enoyl-CoA hydratase and 3-hydroxyacyl CoA dehydrogenase [Source:VGNC Symbol;Acc:VGNC:53541]	Metabolism;Metabolism;Cellular Processes;Organismal Systems;Metabolism;Metabolism;Metabolism;Metabolism;Metabolism;Metabolism;Metabolism;Metabolism	Global and overview maps;Global and overview maps;Transport and catabolism;Endocrine system;Amino acid metabolism;Global and overview maps;Amino acid metabolism;Amino acid metabolism;Lipid metabolism;Metabolism of other amino acids;Carbohydrate metabolism;Carbohydrate metabolism	ko01100//Metabolic pathways;ko01200//Carbon metabolism;ko04146//Peroxisome;ko03320//PPAR signaling pathway;ko00310//Lysine degradation;ko01212//Fatty acid metabolism;ko00280//Valine, leucine and isoleucine degradation;ko00380//Tryptophan metabolism;ko00071//Fatty acid degradation;ko00410//beta-Alanine metabolism;ko00640//Propanoate metabolism;ko00650//Butanoate metabolism	K07514;K07514;K07514;K07514;K07514;K07514;K07514;K07514;K07514;K07514;K07514;K07514	GO:0005777//peroxisome	GO:0003824//catalytic activity;GO:0003857//3-hydroxyacyl-CoA dehydrogenase activity;GO:0004300//enoyl-CoA hydratase activity;GO:0016491//oxidoreductase activity;GO:0016509//long-chain-3-hydroxyacyl-CoA dehydrogenase activity;GO:0016616//oxidoreductase activity, acting on the CH-OH group of donors, NAD or NADP as acceptor;GO:0019899//enzyme binding;GO:0070403//NAD+ binding	GO:0006629//lipid metabolic process;GO:0006631//fatty acid metabolic process;GO:0006635//fatty acid beta-oxidation;GO:0055114//oxidation-reduction process
novel_circ_006625	ENSBTAG00000002393	ENSBTAG00000052280	0.906817	1	2	1	bta-miR-2339	0.0172414	NDUFA7	NADH:ubiquinone oxidoreductase subunit A7 [Source:NCBI gene (formerly Entrezgene);Acc:338063]	Metabolism;Human Diseases;Human Diseases;Organismal Systems;Human Diseases;Metabolism;Human Diseases;Organismal Systems	Global and overview maps;Neurodegenerative diseases;Neurodegenerative diseases;Environmental adaptation;Neurodegenerative diseases;Energy metabolism;Endocrine and metabolic diseases;Nervous system	ko01100//Metabolic pathways;ko05010//Alzheimer disease;ko05016//Huntington disease;ko04714//Thermogenesis;ko05012//Parkinson disease;ko00190//Oxidative phosphorylation;ko04932//Non-alcoholic fatty liver disease (NAFLD);ko04723//Retrograde endocannabinoid signaling	K03951;K03951;K03951;K03951;K03951;K03951;K03951;K03951	GO:0005743//mitochondrial inner membrane	GO:0008137//NADH dehydrogenase (ubiquinone) activity	GO:0042773//ATP synthesis coupled electron transport
novel_circ_007025	ENSBTAG00000003555	ENSBTAG00000005104	0.900623	4	3	2	bta-miR-218|miR-218-x	0.00266709	MGAT5B	alpha-1,6-mannosylglycoprotein 6-beta-N-acetylglucosaminyltransferase B [Source:VGNC Symbol;Acc:VGNC:55847]	Metabolism;Metabolism;Metabolism	Global and overview maps;Glycan biosynthesis and metabolism;Glycan biosynthesis and metabolism	ko01100//Metabolic pathways;ko00510//N-Glycan biosynthesis;ko00515//Mannose type O-glycan biosyntheis	K09661;K09661;K09661	GO:0000139//Golgi membrane;GO:0005794//Golgi apparatus;GO:0016020//membrane;GO:0016021//integral component of membrane	GO:0016740//transferase activity;GO:0016757//transferase activity, transferring glycosyl groups;GO:0030144//alpha-1,6-mannosylglycoprotein 6-beta-N-acetylglucosaminyltransferase activity;GO:0030145//manganese ion binding	GO:0006486//protein glycosylation;GO:0006487//protein N-linked glycosylation;GO:0018215//protein phosphopantetheinylation;GO:0018242//protein O-linked glycosylation via serine
novel_circ_007025	ENSBTAG00000003555	ENSBTAG00000009338	0.915194	4	4	3	bta-miR-218|miR-218-x|miR-218-z	6.27074e-05	LRRC7	leucine rich repeat containing 7 [Source:VGNC Symbol;Acc:VGNC:55251]	-	-	-	-	-	GO:0005515//protein binding	-
novel_circ_007033	NA	ENSBTAG00000017866	0.948658	34	5	5	bta-miR-105a|bta-miR-200b|bta-miR-200c|bta-miR-539|miR-193-x	0.00173488	CD36	CD36 molecule [Source:NCBI gene (formerly Entrezgene);Acc:281052]	Cellular Processes;Organismal Systems;Environmental Information Processing;Human Diseases;Human Diseases;Environmental Information Processing;Organismal Systems;Organismal Systems;Organismal Systems;Organismal Systems	Transport and catabolism;Immune system;Signal transduction;Infectious diseases;Endocrine and metabolic diseases;Signaling molecules and interaction;Endocrine system;Endocrine system;Digestive system;Digestive system	ko04145//Phagosome;ko04640//Hematopoietic cell lineage;ko04152//AMPK signaling pathway;ko05144//Malaria;ko04931//Insulin resistance;ko04512//ECM-receptor interaction;ko03320//PPAR signaling pathway;ko04920//Adipocytokine signaling pathway;ko04979//Cholesterol metabolism;ko04975//Fat digestion and absorption	K06259;K06259;K06259;K06259;K06259;K06259;K06259;K06259;K06259;K06259	GO:0005794//Golgi apparatus;GO:0005886//plasma membrane;GO:0016020//membrane;GO:0016021//integral component of membrane;GO:0016324//apical plasma membrane	-	GO:0006955//immune response;GO:0007155//cell adhesion;GO:0007166//cell surface receptor signaling pathway
novel_circ_007033	NA	ENSBTAG00000026836	0.950403	34	3	3	bta-miR-105a|bta-miR-146b|miR-10015-x	0.0236092	-	XP_013830320.2 PREDICTED: target of Nesh-SH3 isoform X10 [Capra hircus]	-	-	-	-	-	GO:0005515//protein binding	-
novel_circ_007142	ENSBTAG00000007236	ENSBTAG00000017390	0.923502	3	1	1	miR-11977-z	0.0258621	LGI2	leucine rich repeat LGI family member 2 [Source:VGNC Symbol;Acc:VGNC:30857]	-	-	-	-	GO:0005576//extracellular region	GO:0005515//protein binding	GO:1904862//inhibitory synapse assembly
novel_circ_007170	ENSBTAG00000001485	ENSBTAG00000007782	0.941239	2	1	1	bta-miR-144	0.0172414	MYOT	myotilin [Source:VGNC Symbol;Acc:VGNC:55225]	-	-	-	-	-	-	-
novel_circ_007170	ENSBTAG00000001485	ENSBTAG00000008921	0.99725	2	2	1	bta-miR-135b	0.0343328	NEXN	nexilin F-actin binding protein [Source:VGNC Symbol;Acc:VGNC:32025]	-	-	-	-	GO:0005886//plasma membrane;GO:0015629//actin cytoskeleton;GO:0030424//axon	GO:0005515//protein binding;GO:0008307//structural constituent of muscle;GO:0051015//actin filament binding;GO:0098632//cell-cell adhesion mediator activity	GO:0007155//cell adhesion;GO:0007156//homophilic cell adhesion via plasma membrane adhesion molecules;GO:0007411//axon guidance;GO:0030334//regulation of cell migration;GO:0051493//regulation of cytoskeleton organization;GO:0070593//dendrite self-avoidance
novel_circ_007170	ENSBTAG00000001485	ENSBTAG00000014508	0.93537	2	1	1	bta-miR-135b	0.0172414	FBXO40	F-box protein 40 [Source:VGNC Symbol;Acc:VGNC:28911]	-	-	-	-	GO:0005737//cytoplasm	GO:0005515//protein binding;GO:0008270//zinc ion binding;GO:0046872//metal ion binding;GO:0061630//ubiquitin protein ligase activity	GO:0016567//protein ubiquitination;GO:0042692//muscle cell differentiation
novel_circ_007170	ENSBTAG00000001485	ENSBTAG00000014530	0.938988	2	2	2	bta-miR-135b|bta-miR-144	0.000149925	NTNG1	netrin G1 [Source:VGNC Symbol;Acc:VGNC:50086]	Environmental Information Processing;Organismal Systems	Signaling molecules and interaction;Development	ko04514//Cell adhesion molecules (CAMs);ko04360//Axon guidance	K07522;K07522	GO:0005886//plasma membrane;GO:0043256//laminin complex	GO:0050839//cell adhesion molecule binding;GO:0098632//cell-cell adhesion mediator activity	GO:0009887//animal organ morphogenesis;GO:0009888//tissue development;GO:0016477//cell migration;GO:0034446//substrate adhesion-dependent cell spreading;GO:0070831//basement membrane assembly;GO:0099560//synaptic membrane adhesion
novel_circ_007170	ENSBTAG00000001485	ENSBTAG00000016058	0.956882	2	2	1	bta-miR-144	0.0343328	FAM83B	family with sequence similarity 83 member B [Source:VGNC Symbol;Acc:VGNC:28833]	-	-	-	-	GO:0005737//cytoplasm;GO:0016020//membrane	GO:0005154//epidermal growth factor receptor binding;GO:0019901//protein kinase binding;GO:0036312//phosphatidylinositol 3-kinase regulatory subunit binding;GO:0036313//phosphatidylinositol 3-kinase catalytic subunit binding	GO:0007165//signal transduction;GO:0007173//epidermal growth factor receptor signaling pathway;GO:0008283//cell proliferation
novel_circ_007170	ENSBTAG00000001485	ENSBTAG00000018841	0.983024	2	2	1	bta-miR-144	0.0343328	PTPN3	protein tyrosine phosphatase non-receptor type 3 [Source:VGNC Symbol;Acc:VGNC:33538]	-	-	-	-	GO:0005737//cytoplasm;GO:0005856//cytoskeleton;GO:0009898//cytoplasmic side of plasma membrane	GO:0001784//phosphotyrosine residue binding;GO:0004721//phosphoprotein phosphatase activity;GO:0004725//protein tyrosine phosphatase activity;GO:0005515//protein binding;GO:0008092//cytoskeletal protein binding;GO:0016787//hydrolase activity;GO:0016791//phosphatase activity;GO:0017080//sodium channel regulator activity;GO:0051117//ATPase binding	GO:0006470//protein dephosphorylation;GO:0016311//dephosphorylation;GO:0035335//peptidyl-tyrosine dephosphorylation;GO:0045930//negative regulation of mitotic cell cycle;GO:0051045//negative regulation of membrane protein ectodomain proteolysis;GO:0098902//regulation of membrane depolarization during action potential;GO:2000649//regulation of sodium ion transmembrane transporter activity
novel_circ_007170	ENSBTAG00000001485	ENSBTAG00000020087	0.945621	2	7	2	bta-miR-135b|bta-miR-144	0.00314843	CAMK2A	calcium/calmodulin dependent protein kinase II alpha [Source:VGNC Symbol;Acc:VGNC:26721]	Organismal Systems;Human Diseases;Environmental Information Processing;Environmental Information Processing;Human Diseases;Human Diseases;Cellular Processes;Organismal Systems;Environmental Information Processing;Human Diseases;Organismal Systems;Organismal Systems;Organismal Systems;Cellular Processes;Organismal Systems;Environmental Information Processing;Organismal Systems;Organismal Systems;O…	Sensory system;Cancers;Signal transduction;Signal transduction;Cancers;Infectious diseases;Cell growth and death;Development;Signal transduction;Endocrine and metabolic diseases;Circulatory system;Endocrine system;Nervous system;Cell growth and death;Nervous system;Signal transduction;Nervous system;Sensory system;Endocrine system;Environmental adaptation;Endocrine system;Endocrine system;Endocri…	ko04740//Olfactory transduction;ko05200//Pathways in cancer;ko04020//Calcium signaling pathway;ko04024//cAMP signaling pathway;ko05205//Proteoglycans in cancer;ko05152//Tuberculosis;ko04217//Necroptosis;ko04360//Axon guidance;ko04310//Wnt signaling pathway;ko04934//Cushing syndrome;ko04261//Adrenergic signaling in cardiomyocytes;ko04921//Oxytocin signaling pathway;ko04728//Dopaminergic synapse;ko…	K04515;K04515;K04515;K04515;K04515;K04515;K04515;K04515;K04515;K04515;K04515;K04515;K04515;K04515;K04515;K04515;K04515;K04515;K04515;K04515;K04515;K04515;K04515;K04515;K04515;K04515;K04515;K04515;K04515	GO:0005737//cytoplasm;GO:0005954//calcium- and calmodulin-dependent protein kinase complex;GO:0043005//neuron projection;GO:0043197//dendritic spine	GO:0000166//nucleotide binding;GO:0004672//protein kinase activity;GO:0004674//protein serine/threonine kinase activity;GO:0004683//calmodulin-dependent protein kinase activity;GO:0005516//calmodulin binding;GO:0005524//ATP binding;GO:0009931//calcium-dependent protein serine/threonine kinase activity;GO:0016301//kinase activity;GO:0042802//identical protein binding;GO:0042803//protein homodimeri…	GO:0006468//protein phosphorylation;GO:0016310//phosphorylation;GO:0038166//angiotensin-activated signaling pathway;GO:0051092//positive regulation of NF-kappaB transcription factor activity;GO:0060996//dendritic spine development;GO:1990443//peptidyl-threonine autophosphorylation;GO:2001222//regulation of neuron migration
novel_circ_007429	ENSBTAG00000003322	ENSBTAG00000002390	0.952062	1	1	1	miR-10926-z	0.00862069	CCDC184	coiled-coil domain containing 184 [Source:VGNC Symbol;Acc:VGNC:26879]	-	-	-	-	GO:0005737//cytoplasm	-	-
novel_circ_007429	ENSBTAG00000003322	ENSBTAG00000004305	0.926384	1	4	1	miR-10926-z	0.0344828	RGS16	regulator of G protein signaling 16 [Source:VGNC Symbol;Acc:VGNC:33915]	-	-	-	-	GO:0005737//cytoplasm;GO:0016020//membrane;GO:0031224//intrinsic component of membrane	GO:0005096//GTPase activator activity	GO:0007186//G protein-coupled receptor signaling pathway;GO:0009968//negative regulation of signal transduction;GO:0043547//positive regulation of GTPase activity
novel_circ_007429	ENSBTAG00000003322	ENSBTAG00000007109	0.973078	1	1	1	miR-10926-z	0.00862069	ASB2	ankyrin repeat and SOCS box containing 2 [Source:VGNC Symbol;Acc:VGNC:26196]	-	-	-	-	GO:0000151//ubiquitin ligase complex	GO:0005515//protein binding;GO:0061630//ubiquitin protein ligase activity	GO:0006511//ubiquitin-dependent protein catabolic process;GO:0016567//protein ubiquitination;GO:0035556//intracellular signal transduction;GO:0035914//skeletal muscle cell differentiation
novel_circ_007429	ENSBTAG00000003322	ENSBTAG00000019008	0.975826	1	5	1	miR-10926-z	0.0431035	FBXL16	F-box and leucine rich repeat protein 16 [Source:VGNC Symbol;Acc:VGNC:52773]	-	-	-	-	GO:0019005//SCF ubiquitin ligase complex	GO:0005515//protein binding	GO:0031146//SCF-dependent proteasomal ubiquitin-dependent protein catabolic process
novel_circ_007429	ENSBTAG00000003322	ENSBTAG00000021727	0.930562	1	2	1	miR-10926-z	0.0172414	NTSR1	neurotensin receptor 1 [Source:VGNC Symbol;Acc:VGNC:32312]	Environmental Information Processing;Environmental Information Processing	Signaling molecules and interaction;Signal transduction	ko04080//Neuroactive ligand-receptor interaction;ko04020//Calcium signaling pathway	K04211;K04211	GO:0005886//plasma membrane;GO:0005887//integral component of plasma membrane;GO:0016020//membrane;GO:0016021//integral component of membrane;GO:0045121//membrane raft	GO:0004930//G protein-coupled receptor activity;GO:0016492//G protein-coupled neurotensin receptor activity;GO:0042802//identical protein binding	GO:0007165//signal transduction;GO:0007186//G protein-coupled receptor signaling pathway;GO:0007218//neuropeptide signaling pathway;GO:0008344//adult locomotory behavior;GO:0043066//negative regulation of apoptotic process
novel_circ_007429	ENSBTAG00000003322	ENSBTAG00000035958	0.980402	1	1	1	miR-10926-z	0.00862069	RHOBTB2	Rho-related BTB domain containing 2 [Source:NCBI gene (formerly Entrezgene);Acc:784567]	Genetic Information Processing	Folding, sorting and degradation	ko04120//Ubiquitin mediated proteolysis	K07868	GO:0005856//cytoskeleton;GO:0005886//plasma membrane;GO:0005938//cell cortex;GO:0031410//cytoplasmic vesicle;GO:0042995//cell projection;GO:0043231//intracellular membrane-bounded organelle	GO:0003924//GTPase activity;GO:0005515//protein binding;GO:0005525//GTP binding;GO:0019901//protein kinase binding	GO:0007015//actin filament organization;GO:0007163//establishment or maintenance of cell polarity;GO:0007264//small GTPase mediated signal transduction;GO:0008360//regulation of cell shape;GO:0030865//cortical cytoskeleton organization;GO:0032956//regulation of actin cytoskeleton organization;GO:0043652//engulfment of apoptotic cell
novel_circ_007480	ENSBTAG00000026915	ENSBTAG00000017866	0.973377	6	5	2	bta-miR-105a|bta-miR-539	0.0209419	CD36	CD36 molecule [Source:NCBI gene (formerly Entrezgene);Acc:281052]	Cellular Processes;Organismal Systems;Environmental Information Processing;Human Diseases;Human Diseases;Environmental Information Processing;Organismal Systems;Organismal Systems;Organismal Systems;Organismal Systems	Transport and catabolism;Immune system;Signal transduction;Infectious diseases;Endocrine and metabolic diseases;Signaling molecules and interaction;Endocrine system;Endocrine system;Digestive system;Digestive system	ko04145//Phagosome;ko04640//Hematopoietic cell lineage;ko04152//AMPK signaling pathway;ko05144//Malaria;ko04931//Insulin resistance;ko04512//ECM-receptor interaction;ko03320//PPAR signaling pathway;ko04920//Adipocytokine signaling pathway;ko04979//Cholesterol metabolism;ko04975//Fat digestion and absorption	K06259;K06259;K06259;K06259;K06259;K06259;K06259;K06259;K06259;K06259	GO:0005794//Golgi apparatus;GO:0005886//plasma membrane;GO:0016020//membrane;GO:0016021//integral component of membrane;GO:0016324//apical plasma membrane	-	GO:0006955//immune response;GO:0007155//cell adhesion;GO:0007166//cell surface receptor signaling pathway
novel_circ_007480	ENSBTAG00000026915	ENSBTAG00000026836	0.981597	6	3	2	bta-miR-105a|bta-miR-146b	0.00658881	-	XP_013830320.2 PREDICTED: target of Nesh-SH3 isoform X10 [Capra hircus]	-	-	-	-	-	GO:0005515//protein binding	-
novel_circ_007508	ENSBTAG00000017753	ENSBTAG00000008921	0.915247	1	2	1	bta-miR-135b	0.0172414	NEXN	nexilin F-actin binding protein [Source:VGNC Symbol;Acc:VGNC:32025]	-	-	-	-	GO:0005886//plasma membrane;GO:0015629//actin cytoskeleton;GO:0030424//axon	GO:0005515//protein binding;GO:0008307//structural constituent of muscle;GO:0051015//actin filament binding;GO:0098632//cell-cell adhesion mediator activity	GO:0007155//cell adhesion;GO:0007156//homophilic cell adhesion via plasma membrane adhesion molecules;GO:0007411//axon guidance;GO:0030334//regulation of cell migration;GO:0051493//regulation of cytoskeleton organization;GO:0070593//dendrite self-avoidance
novel_circ_007508	ENSBTAG00000017753	ENSBTAG00000014530	0.908403	1	2	1	bta-miR-135b	0.0172414	NTNG1	netrin G1 [Source:VGNC Symbol;Acc:VGNC:50086]	Environmental Information Processing;Organismal Systems	Signaling molecules and interaction;Development	ko04514//Cell adhesion molecules (CAMs);ko04360//Axon guidance	K07522;K07522	GO:0005886//plasma membrane;GO:0043256//laminin complex	GO:0050839//cell adhesion molecule binding;GO:0098632//cell-cell adhesion mediator activity	GO:0009887//animal organ morphogenesis;GO:0009888//tissue development;GO:0016477//cell migration;GO:0034446//substrate adhesion-dependent cell spreading;GO:0070831//basement membrane assembly;GO:0099560//synaptic membrane adhesion
novel_circ_007508	ENSBTAG00000017753	ENSBTAG00000017802	0.929514	1	4	1	bta-miR-135b	0.0344828	THRB	thyroid hormone receptor beta [Source:VGNC Symbol;Acc:VGNC:35847]	Environmental Information Processing;Organismal Systems	Signaling molecules and interaction;Endocrine system	ko04080//Neuroactive ligand-receptor interaction;ko04919//Thyroid hormone signaling pathway	K08362;K08362	GO:0005634//nucleus;GO:0016604//nuclear body	GO:0000978//RNA polymerase II proximal promoter sequence-specific DNA binding;GO:0001225//RNA polymerase II transcription coactivator binding;GO:0003677//DNA binding;GO:0003682//chromatin binding;GO:0003700//DNA-binding transcription factor activity;GO:0004879//nuclear receptor activity;GO:0008270//zinc ion binding;GO:0019899//enzyme binding;GO:0031490//chromatin DNA binding;GO:0043565//sequence-…	GO:0000122//negative regulation of transcription by RNA polymerase II;GO:0002154//thyroid hormone mediated signaling pathway;GO:0006355//regulation of transcription, DNA-templated;GO:0006357//regulation of transcription by RNA polymerase II;GO:0007605//sensory perception of sound;GO:0007621//negative regulation of female receptivity;GO:0008016//regulation of heart contraction;GO:0008050//female c…
novel_circ_007508	ENSBTAG00000017753	ENSBTAG00000021574	0.904481	1	4	1	bta-miR-135b	0.0344828	TCF7L2	transcription factor 7 like 2 [Source:VGNC Symbol;Acc:VGNC:55976]	Human Diseases;Human Diseases;Human Diseases;Human Diseases;Environmental Information Processing;Environmental Information Processing;Human Diseases;Human Diseases;Human Diseases;Organismal Systems;Human Diseases;Human Diseases;Human Diseases;Cellular Processes;Human Diseases;Human Diseases;Human Diseases;Human Diseases	Cancers;Infectious diseases;Infectious diseases;Cancers;Signal transduction;Signal transduction;Endocrine and metabolic diseases;Cancers;Cancers;Endocrine system;Cancers;Cancers;Cardiovascular diseases;Cellular community - eukaryotes;Cancers;Cancers;Cancers;Cancers	ko05200//Pathways in cancer;ko05165//Human papillomavirus infection;ko05132//Salmonella infection;ko05225//Hepatocellular carcinoma;ko04310//Wnt signaling pathway;ko04390//Hippo signaling pathway;ko04934//Cushing syndrome;ko05226//Gastric cancer;ko05224//Breast cancer;ko04916//Melanogenesis;ko05215//Prostate cancer;ko05210//Colorectal cancer;ko05412//Arrhythmogenic right ventricular cardiomyopath…	K04491;K04491;K04491;K04491;K04491;K04491;K04491;K04491;K04491;K04491;K04491;K04491;K04491;K04491;K04491;K04491;K04491;K04491	GO:0000785//chromatin;GO:0005634//nucleus;GO:0005654//nucleoplasm;GO:0032993//protein-DNA complex;GO:0070369//beta-catenin-TCF7L2 complex;GO:0071664//catenin-TCF7L2 complex;GO:1990907//beta-catenin-TCF complex	GO:0000976//transcription regulatory region sequence-specific DNA binding;GO:0000978//RNA polymerase II proximal promoter sequence-specific DNA binding;GO:0000981//DNA-binding transcription factor activity, RNA polymerase II-specific;GO:0001103//RNA polymerase II repressing transcription factor binding;GO:0003677//DNA binding;GO:0003700//DNA-binding transcription factor activity;GO:0008013//beta-…	GO:0000122//negative regulation of transcription by RNA polymerase II;GO:0001568//blood vessel development;GO:0006357//regulation of transcription by RNA polymerase II;GO:0007050//cell cycle arrest;GO:0010909//positive regulation of heparan sulfate proteoglycan biosynthetic process;GO:0016055//Wnt signaling pathway;GO:0032024//positive regulation of insulin secretion;GO:0032092//positive regulati…
novel_circ_007666	ENSBTAG00000038181	ENSBTAG00000004720	0.916135	2	2	1	miR-26-z	0.0343328	SULF1	sulfatase 1 [Source:VGNC Symbol;Acc:VGNC:53880]	-	-	-	-	GO:0005615//extracellular space;GO:0005783//endoplasmic reticulum;GO:0005794//Golgi apparatus;GO:0005795//Golgi stack;GO:0005886//plasma membrane;GO:0009986//cell surface;GO:0045121//membrane raft	GO:0003824//catalytic activity;GO:0004065//arylsulfatase activity;GO:0005509//calcium ion binding;GO:0008449//N-acetylglucosamine-6-sulfatase activity;GO:0008484//sulfuric ester hydrolase activity;GO:0016787//hydrolase activity;GO:0046872//metal ion binding	GO:0001502//cartilage condensation;GO:0001822//kidney development;GO:0001937//negative regulation of endothelial cell proliferation;GO:0002063//chondrocyte development;GO:0003094//glomerular filtration;GO:0007155//cell adhesion;GO:0010575//positive regulation of vascular endothelial growth factor production;GO:0014846//esophagus smooth muscle contraction;GO:0016525//negative regulation of angioge…
novel_circ_008029	ENSBTAG00000044190	ENSBTAG00000000914	0.994973	3	15	2	bta-miR-139|bta-miR-7865	0.0436361	OPRK1	opioid receptor kappa 1 [Source:VGNC Symbol;Acc:VGNC:32439]	Environmental Information Processing	Signaling molecules and interaction	ko04080//Neuroactive ligand-receptor interaction	K04214	GO:0005654//nucleoplasm;GO:0005829//cytosol;GO:0005886//plasma membrane;GO:0005887//integral component of plasma membrane;GO:0016021//integral component of membrane	GO:0004930//G protein-coupled receptor activity;GO:0004985//opioid receptor activity;GO:0038048//dynorphin receptor activity	GO:0006955//immune response;GO:0007186//G protein-coupled receptor signaling pathway;GO:0031635//adenylate cyclase-inhibiting opioid receptor signaling pathway;GO:0038003//opioid receptor signaling pathway;GO:0051607//defense response to virus
novel_circ_008029	ENSBTAG00000044190	ENSBTAG00000009331	0.986171	3	1	1	bta-miR-7865	0.0258621	CPAMD8	C3 and PZP like alpha-2-macroglobulin domain containing 8 [Source:VGNC Symbol;Acc:VGNC:27644]	-	-	-	-	GO:0005576//extracellular region;GO:0005615//extracellular space	GO:0004866//endopeptidase inhibitor activity;GO:0004867//serine-type endopeptidase inhibitor activity;GO:0005515//protein binding;GO:0030414//peptidase inhibitor activity	GO:0001654//eye development;GO:0010466//negative regulation of peptidase activity;GO:0010951//negative regulation of endopeptidase activity
novel_circ_008121	ENSBTAG00000013302	ENSBTAG00000011381	0.904601	2	2	1	miR-34-x	0.0343328	SLC30A3	solute carrier family 30 member 3 [Source:VGNC Symbol;Acc:VGNC:34808]	-	-	-	-	GO:0005737//cytoplasm;GO:0005770//late endosome;GO:0008021//synaptic vesicle;GO:0016021//integral component of membrane;GO:0030285//integral component of synaptic vesicle membrane;GO:0030672//synaptic vesicle membrane;GO:0043005//neuron projection;GO:0097457//hippocampal mossy fiber;GO:0098686//hippocampal mossy fiber to CA3 synapse;GO:0098978//glutamatergic synapse	GO:0008324//cation transmembrane transporter activity	GO:0006812//cation transport;GO:0051050//positive regulation of transport;GO:0055085//transmembrane transport;GO:0061088//regulation of sequestering of zinc ion;GO:0099180//zinc ion import into synaptic vesicle
novel_circ_008121	ENSBTAG00000013302	ENSBTAG00000012630	0.949895	2	2	1	miR-34-x	0.0343328	PAMR1	peptidase domain containing associated with muscle reration 1 [Source:VGNC Symbol;Acc:VGNC:32562]	-	-	-	-	-	GO:0004252//serine-type endopeptidase activity;GO:0005509//calcium ion binding	GO:0006508//proteolysis
novel_circ_008121	ENSBTAG00000013302	ENSBTAG00000014968	0.928736	2	1	1	miR-34-x	0.0172414	YJEFN3	YjeF N-terminal domain containing 3 [Source:VGNC Symbol;Acc:VGNC:97329]	-	-	-	-	GO:0005739//mitochondrion	GO:0052856//NADHX epimerase activity;GO:0052857//NADPHX epimerase activity	-
novel_circ_008121	ENSBTAG00000013302	ENSBTAG00000021727	0.933851	2	2	1	miR-34-x	0.0343328	NTSR1	neurotensin receptor 1 [Source:VGNC Symbol;Acc:VGNC:32312]	Environmental Information Processing;Environmental Information Processing	Signaling molecules and interaction;Signal transduction	ko04080//Neuroactive ligand-receptor interaction;ko04020//Calcium signaling pathway	K04211;K04211	GO:0005886//plasma membrane;GO:0005887//integral component of plasma membrane;GO:0016020//membrane;GO:0016021//integral component of membrane;GO:0045121//membrane raft	GO:0004930//G protein-coupled receptor activity;GO:0016492//G protein-coupled neurotensin receptor activity;GO:0042802//identical protein binding	GO:0007165//signal transduction;GO:0007186//G protein-coupled receptor signaling pathway;GO:0007218//neuropeptide signaling pathway;GO:0008344//adult locomotory behavior;GO:0043066//negative regulation of apoptotic process
novel_circ_008132	ENSBTAG00000005110	ENSBTAG00000017390	0.928525	2	1	1	miR-11977-z	0.0172414	LGI2	leucine rich repeat LGI family member 2 [Source:VGNC Symbol;Acc:VGNC:30857]	-	-	-	-	GO:0005576//extracellular region	GO:0005515//protein binding	GO:1904862//inhibitory synapse assembly
novel_circ_008143	ENSBTAG00000054693	ENSBTAG00000006902	0.902357	11	6	4	bta-miR-190a|miR-1224-x|miR-195-z|miR-211-x	0.000623742	KCNJ5	potassium inwardly rectifying channel subfamily J member 5 [Source:VGNC Symbol;Acc:VGNC:30462]	Organismal Systems;Organismal Systems;Organismal Systems;Organismal Systems;Organismal Systems;Organismal Systems;Organismal Systems;Human Diseases;Organismal Systems	Nervous system;Endocrine system;Endocrine system;Nervous system;Nervous system;Environmental adaptation;Endocrine system;Substance dependence;Endocrine system	ko04723//Retrograde endocannabinoid signaling;ko04921//Oxytocin signaling pathway;ko04915//Estrogen signaling pathway;ko04728//Dopaminergic synapse;ko04726//Serotonergic synapse;ko04713//Circadian entrainment;ko04925//Aldosterone synthesis and secretion;ko05032//Morphine addiction;ko04929//GnRH secretion	K04999;K04999;K04999;K04999;K04999;K04999;K04999;K04999;K04999	GO:0008076//voltage-gated potassium channel complex;GO:0016020//membrane;GO:0016021//integral component of membrane	GO:0005242//inward rectifier potassium channel activity;GO:0015467//G-protein activated inward rectifier potassium channel activity;GO:0086089//voltage-gated potassium channel activity involved in atrial cardiac muscle cell action potential repolarization	GO:0006813//potassium ion transport;GO:0086091//regulation of heart rate by cardiac conduction;GO:0098914//membrane repolarization during atrial cardiac muscle cell action potential;GO:1990573//potassium ion import across plasma membrane
novel_circ_008143	ENSBTAG00000054693	ENSBTAG00000014758	0.981418	11	3	2	bta-miR-33a|miR-195-z	0.0234356	WIF1	WNT inhibitory factor 1 [Source:VGNC Symbol;Acc:VGNC:36938]	Environmental Information Processing	Signal transduction	ko04310//Wnt signaling pathway	K01691	GO:0005576//extracellular region;GO:0009986//cell surface	GO:0005102//signaling receptor binding	GO:0045600//positive regulation of fat cell differentiation;GO:0048856//anatomical structure development
novel_circ_008267	ENSBTAG00000000942	ENSBTAG00000019870	0.985318	4	10	2	bta-miR-12028|novel-m0011-5p	0.0367802	SLC14A1	solute carrier family 14 member 1 [Source:VGNC Symbol;Acc:VGNC:53653]	-	-	-	-	GO:0005886//plasma membrane;GO:0005887//integral component of plasma membrane;GO:0016020//membrane;GO:0016021//integral component of membrane	GO:0005372//water transmembrane transporter activity;GO:0015204//urea transmembrane transporter activity;GO:0015265//urea channel activity;GO:0042802//identical protein binding	GO:0006833//water transport;GO:0015840//urea transport;GO:0071918//urea transmembrane transport
novel_circ_008287	ENSBTAG00000016999	ENSBTAG00000047599	0.913003	2	2	1	bta-miR-33a	0.0343328	GHRHR	growth hormone releasing hormone receptor [Source:VGNC Symbol;Acc:VGNC:29350]	Environmental Information Processing;Organismal Systems	Signaling molecules and interaction;Endocrine system	ko04080//Neuroactive ligand-receptor interaction;ko04935//Growth hormone synthesis, secretion and action	K04584;K04584	GO:0005637//nuclear inner membrane;GO:0005640//nuclear outer membrane;GO:0005737//cytoplasm;GO:0005886//plasma membrane;GO:0009986//cell surface;GO:0016020//membrane;GO:0016021//integral component of membrane;GO:0016363//nuclear matrix;GO:0030141//secretory granule	GO:0004888//transmembrane signaling receptor activity;GO:0004930//G protein-coupled receptor activity;GO:0008528//G protein-coupled peptide receptor activity;GO:0016520//growth hormone-releasing hormone receptor activity;GO:0017046//peptide hormone binding;GO:0019838//growth factor binding	GO:0007166//cell surface receptor signaling pathway;GO:0007186//G protein-coupled receptor signaling pathway;GO:0007188//adenylate cyclase-modulating G protein-coupled receptor signaling pathway;GO:0007189//adenylate cyclase-activating G protein-coupled receptor signaling pathway;GO:0007595//lactation;GO:0008284//positive regulation of cell proliferation;GO:0008340//determination of adult lifespa…
novel_circ_008315	ENSBTAG00000008464	ENSBTAG00000000570	0.974266	1	5	1	miR-128-x	0.0431035	RET	ret proto-onco [Source:VGNC Symbol;Acc:VGNC:33876]	Human Diseases;Human Diseases;Human Diseases	Cancers;Cancers;Cancers	ko05200//Pathways in cancer;ko05230//Central carbon metabolism in cancer;ko05216//Thyroid cancer	K05126;K05126;K05126	GO:0005886//plasma membrane;GO:0005887//integral component of plasma membrane;GO:0010008//endosome membrane;GO:0016020//membrane;GO:0030424//axon;GO:0043235//receptor complex;GO:0045121//membrane raft;GO:0098797//plasma membrane protein complex	GO:0000166//nucleotide binding;GO:0004672//protein kinase activity;GO:0004713//protein tyrosine kinase activity;GO:0004714//transmembrane receptor protein tyrosine kinase activity;GO:0005509//calcium ion binding;GO:0005524//ATP binding;GO:0016301//kinase activity;GO:0016740//transferase activity	GO:0000165//MAPK cascade;GO:0000187//activation of MAPK activity;GO:0001657//ureteric bud development;GO:0001755//neural crest cell migration;GO:0001838//embryonic epithelial tube formation;GO:0006468//protein phosphorylation;GO:0007155//cell adhesion;GO:0007156//homophilic cell adhesion via plasma membrane adhesion molecules;GO:0007158//neuron cell-cell adhesion;GO:0007169//transmembrane recepto…
novel_circ_008315	ENSBTAG00000008464	ENSBTAG00000004119	0.972452	1	4	1	miR-128-x	0.0344828	NEUROD2	neuronal differentiation 2 [Source:VGNC Symbol;Acc:VGNC:32018]	-	-	-	-	GO:0005634//nucleus	GO:0000977//RNA polymerase II regulatory region sequence-specific DNA binding;GO:0000978//RNA polymerase II proximal promoter sequence-specific DNA binding;GO:0000981//DNA-binding transcription factor activity, RNA polymerase II-specific;GO:0001228//DNA-binding transcription activator activity, RNA polymerase II-specific;GO:0003677//DNA binding;GO:0003700//DNA-binding transcription factor activit…	GO:0001662//behavioral fear response;GO:0006355//regulation of transcription, DNA-templated;GO:0006357//regulation of transcription by RNA polymerase II;GO:0007275//multicellular organism development;GO:0007399//nervous system development;GO:0008306//associative learning;GO:0016567//protein ubiquitination;GO:0021695//cerebellar cortex development;GO:0030154//cell differentiation;GO:0030182//neuro…
novel_circ_008336	ENSBTAG00000048460	ENSBTAG00000012144	0.901731	18	2	2	bta-miR-11974|miR-10926-z	0.0229385	ZMYND19	zinc finger MYND-type containing 19 [Source:VGNC Symbol;Acc:VGNC:37205]	-	-	-	-	GO:0005737//cytoplasm;GO:0016020//membrane;GO:0045202//synapse	-	-
novel_circ_008336	ENSBTAG00000048460	ENSBTAG00000012604	0.926005	18	2	2	miR-1296-x|miR-218-x	0.0229385	NCMAP	non-compact myelin associated protein [Source:VGNC Symbol;Acc:VGNC:31920]	-	-	-	-	GO:0005887//integral component of plasma membrane;GO:0016020//membrane;GO:0016021//integral component of membrane;GO:0033270//paranode region of axon;GO:0043220//Schmidt-Lanterman incisure	GO:0019911//structural constituent of myelin sheath	GO:0031641//regulation of myelination;GO:0032290//peripheral nervous system myelin formation
novel_circ_008336	ENSBTAG00000048460	ENSBTAG00000019625	0.918157	18	9	7	bta-miR-11974|bta-miR-135b|bta-miR-144|bta-miR-218|bta-miR-455-3p|miR-101-x|miR-218-x	2.04098e-05	EHHADH	enoyl-CoA hydratase and 3-hydroxyacyl CoA dehydrogenase [Source:VGNC Symbol;Acc:VGNC:53541]	Metabolism;Metabolism;Cellular Processes;Organismal Systems;Metabolism;Metabolism;Metabolism;Metabolism;Metabolism;Metabolism;Metabolism;Metabolism	Global and overview maps;Global and overview maps;Transport and catabolism;Endocrine system;Amino acid metabolism;Global and overview maps;Amino acid metabolism;Amino acid metabolism;Lipid metabolism;Metabolism of other amino acids;Carbohydrate metabolism;Carbohydrate metabolism	ko01100//Metabolic pathways;ko01200//Carbon metabolism;ko04146//Peroxisome;ko03320//PPAR signaling pathway;ko00310//Lysine degradation;ko01212//Fatty acid metabolism;ko00280//Valine, leucine and isoleucine degradation;ko00380//Tryptophan metabolism;ko00071//Fatty acid degradation;ko00410//beta-Alanine metabolism;ko00640//Propanoate metabolism;ko00650//Butanoate metabolism	K07514;K07514;K07514;K07514;K07514;K07514;K07514;K07514;K07514;K07514;K07514;K07514	GO:0005777//peroxisome	GO:0003824//catalytic activity;GO:0003857//3-hydroxyacyl-CoA dehydrogenase activity;GO:0004300//enoyl-CoA hydratase activity;GO:0016491//oxidoreductase activity;GO:0016509//long-chain-3-hydroxyacyl-CoA dehydrogenase activity;GO:0016616//oxidoreductase activity, acting on the CH-OH group of donors, NAD or NADP as acceptor;GO:0019899//enzyme binding;GO:0070403//NAD+ binding	GO:0006629//lipid metabolic process;GO:0006631//fatty acid metabolic process;GO:0006635//fatty acid beta-oxidation;GO:0055114//oxidation-reduction process
novel_circ_008453	ENSBTAG00000015559	ENSBTAG00000002390	0.919244	3	1	1	miR-10926-z	0.0258621	CCDC184	coiled-coil domain containing 184 [Source:VGNC Symbol;Acc:VGNC:26879]	-	-	-	-	GO:0005737//cytoplasm	-	-
novel_circ_008453	ENSBTAG00000015559	ENSBTAG00000010866	0.951324	3	1	1	bta-miR-135b	0.0258621	BMPER	BMP binding endothelial regulator [Source:VGNC Symbol;Acc:VGNC:26523]	-	-	-	-	GO:0005576//extracellular region;GO:0005615//extracellular space;GO:0031012//extracellular matrix	GO:0005515//protein binding	GO:0001568//blood vessel development;GO:0001657//ureteric bud development;GO:0002043//blood vessel endothelial cell proliferation involved in sprouting angiogenesis;GO:0010594//regulation of endothelial cell migration;GO:0030514//negative regulation of BMP signaling pathway;GO:0042118//endothelial cell activation;GO:0045765//regulation of angiogenesis;GO:0048839//inner ear development;GO:0060393/…
novel_circ_008551	ENSBTAG00000038949	ENSBTAG00000005104	0.970304	3	3	2	bta-miR-218|miR-218-x	0.00134143	MGAT5B	alpha-1,6-mannosylglycoprotein 6-beta-N-acetylglucosaminyltransferase B [Source:VGNC Symbol;Acc:VGNC:55847]	Metabolism;Metabolism;Metabolism	Global and overview maps;Glycan biosynthesis and metabolism;Glycan biosynthesis and metabolism	ko01100//Metabolic pathways;ko00510//N-Glycan biosynthesis;ko00515//Mannose type O-glycan biosyntheis	K09661;K09661;K09661	GO:0000139//Golgi membrane;GO:0005794//Golgi apparatus;GO:0016020//membrane;GO:0016021//integral component of membrane	GO:0016740//transferase activity;GO:0016757//transferase activity, transferring glycosyl groups;GO:0030144//alpha-1,6-mannosylglycoprotein 6-beta-N-acetylglucosaminyltransferase activity;GO:0030145//manganese ion binding	GO:0006486//protein glycosylation;GO:0006487//protein N-linked glycosylation;GO:0018215//protein phosphopantetheinylation;GO:0018242//protein O-linked glycosylation via serine
novel_circ_008551	ENSBTAG00000038949	ENSBTAG00000007703	0.949511	3	4	2	bta-miR-218|miR-218-x	0.00266709	NMT2	N-myristoyltransferase 2 [Source:VGNC Symbol;Acc:VGNC:32138]	-	-	-	-	GO:0005737//cytoplasm;GO:0005794//Golgi apparatus;GO:0005829//cytosol;GO:0005886//plasma membrane;GO:0019898//extrinsic component of membrane	GO:0004379//glycylpeptide N-tetradecanoyltransferase activity;GO:0016740//transferase activity;GO:0016746//transferase activity, transferring acyl groups	GO:0006499//N-terminal protein myristoylation;GO:0018008//N-terminal peptidyl-glycine N-myristoylation
novel_circ_008551	ENSBTAG00000038949	ENSBTAG00000014194	0.901532	3	11	3	bta-miR-218|miR-218-x|miR-218-z	0.00065099	ADARB2	adenosine deaminase RNA specific B2 (inactive) [Source:NCBI gene (formerly Entrezgene);Acc:524061]	-	-	-	-	GO:0005730//nucleolus;GO:0005737//cytoplasm	GO:0003723//RNA binding;GO:0003725//double-stranded RNA binding;GO:0003726//double-stranded RNA adenosine deaminase activity;GO:0004000//adenosine deaminase activity;GO:0008251//tRNA-specific adenosine deaminase activity	GO:0006382//adenosine to inosine editing;GO:0006396//RNA processing
novel_circ_008551	ENSBTAG00000038949	ENSBTAG00000017420	0.902082	3	3	3	bta-miR-218|miR-218-x|miR-218-z	3.9454e-06	ZMAT4	zinc finger matrin-type 4 [Source:VGNC Symbol;Acc:VGNC:37193]	-	-	-	-	-	GO:0003676//nucleic acid binding;GO:0008270//zinc ion binding	-
novel_circ_008551	ENSBTAG00000038949	ENSBTAG00000038700	0.975148	3	3	2	bta-miR-218|miR-218-x	0.00134143	FAM124B	family with sequence similarity 124 member B [Source:VGNC Symbol;Acc:VGNC:56107]	-	-	-	-	GO:0005654//nucleoplasm;GO:0005739//mitochondrion	-	-
novel_circ_008551	ENSBTAG00000038949	ENSBTAG00000049058	0.961264	3	8	2	bta-miR-218|miR-218-x	0.0121518	INHBB	inhibin subunit beta B [Source:VGNC Symbol;Acc:VGNC:30201]	Environmental Information Processing;Cellular Processes;Environmental Information Processing	Signaling molecules and interaction;Cellular community - eukaryotes;Signal transduction	ko04060//Cytokine-cytokine receptor interaction;ko04550//Signaling pathways regulating pluripotency of stem cells;ko04350//TGF-beta signaling pathway	K22687;K22687;K22687	GO:0005576//extracellular region;GO:0005615//extracellular space;GO:0048471//perinuclear region of cytoplasm;GO:0071944//cell periphery	GO:0005125//cytokine activity;GO:0005179//hormone activity;GO:0008083//growth factor activity;GO:0042803//protein homodimerization activity	GO:0009267//cellular response to starvation;GO:0009611//response to wounding;GO:0010862//positive regulation of pathway-restricted SMAD protein phosphorylation;GO:0032686//negative regulation of hepatocyte growth factor production;GO:0032869//cellular response to insulin stimulus;GO:0032924//activin receptor signaling pathway;GO:0044320//cellular response to leptin stimulus;GO:0045444//fat cell d…
novel_circ_008551	ENSBTAG00000038949	ENSBTAG00000051600	0.956534	3	4	2	bta-miR-218|miR-218-x	0.00266709	-	XP_032263750.1 A-kinase anchoring protein 7 isoform X3 [Phoca vitulina]	-	-	-	-	GO:0005829//cytosol	GO:0034237//protein kinase A regulatory subunit binding	GO:0010738//regulation of protein kinase A signaling
novel_circ_008947	ENSBTAG00000018656	ENSBTAG00000000914	0.96901	2	15	2	bta-miR-429|miR-200-y	0.0157421	OPRK1	opioid receptor kappa 1 [Source:VGNC Symbol;Acc:VGNC:32439]	Environmental Information Processing	Signaling molecules and interaction	ko04080//Neuroactive ligand-receptor interaction	K04214	GO:0005654//nucleoplasm;GO:0005829//cytosol;GO:0005886//plasma membrane;GO:0005887//integral component of plasma membrane;GO:0016021//integral component of membrane	GO:0004930//G protein-coupled receptor activity;GO:0004985//opioid receptor activity;GO:0038048//dynorphin receptor activity	GO:0006955//immune response;GO:0007186//G protein-coupled receptor signaling pathway;GO:0031635//adenylate cyclase-inhibiting opioid receptor signaling pathway;GO:0038003//opioid receptor signaling pathway;GO:0051607//defense response to virus
novel_circ_009158	ENSBTAG00000007315	ENSBTAG00000007109	0.911468	1	1	1	miR-10926-z	0.00862069	ASB2	ankyrin repeat and SOCS box containing 2 [Source:VGNC Symbol;Acc:VGNC:26196]	-	-	-	-	GO:0000151//ubiquitin ligase complex	GO:0005515//protein binding;GO:0061630//ubiquitin protein ligase activity	GO:0006511//ubiquitin-dependent protein catabolic process;GO:0016567//protein ubiquitination;GO:0035556//intracellular signal transduction;GO:0035914//skeletal muscle cell differentiation
novel_circ_009158	ENSBTAG00000007315	ENSBTAG00000019008	0.928042	1	5	1	miR-10926-z	0.0431035	FBXL16	F-box and leucine rich repeat protein 16 [Source:VGNC Symbol;Acc:VGNC:52773]	-	-	-	-	GO:0019005//SCF ubiquitin ligase complex	GO:0005515//protein binding	GO:0031146//SCF-dependent proteasomal ubiquitin-dependent protein catabolic process
novel_circ_009158	ENSBTAG00000007315	ENSBTAG00000035958	0.954254	1	1	1	miR-10926-z	0.00862069	RHOBTB2	Rho-related BTB domain containing 2 [Source:NCBI gene (formerly Entrezgene);Acc:784567]	Genetic Information Processing	Folding, sorting and degradation	ko04120//Ubiquitin mediated proteolysis	K07868	GO:0005856//cytoskeleton;GO:0005886//plasma membrane;GO:0005938//cell cortex;GO:0031410//cytoplasmic vesicle;GO:0042995//cell projection;GO:0043231//intracellular membrane-bounded organelle	GO:0003924//GTPase activity;GO:0005515//protein binding;GO:0005525//GTP binding;GO:0019901//protein kinase binding	GO:0007015//actin filament organization;GO:0007163//establishment or maintenance of cell polarity;GO:0007264//small GTPase mediated signal transduction;GO:0008360//regulation of cell shape;GO:0030865//cortical cytoskeleton organization;GO:0032956//regulation of actin cytoskeleton organization;GO:0043652//engulfment of apoptotic cell
novel_circ_009412	ENSBTAG00000021688	ENSBTAG00000014758	0.914821	1	3	1	bta-miR-33a	0.0258621	WIF1	WNT inhibitory factor 1 [Source:VGNC Symbol;Acc:VGNC:36938]	Environmental Information Processing	Signal transduction	ko04310//Wnt signaling pathway	K01691	GO:0005576//extracellular region;GO:0009986//cell surface	GO:0005102//signaling receptor binding	GO:0045600//positive regulation of fat cell differentiation;GO:0048856//anatomical structure development
novel_circ_009412	ENSBTAG00000021688	ENSBTAG00000047599	0.946358	1	2	1	bta-miR-33a	0.0172414	GHRHR	growth hormone releasing hormone receptor [Source:VGNC Symbol;Acc:VGNC:29350]	Environmental Information Processing;Organismal Systems	Signaling molecules and interaction;Endocrine system	ko04080//Neuroactive ligand-receptor interaction;ko04935//Growth hormone synthesis, secretion and action	K04584;K04584	GO:0005637//nuclear inner membrane;GO:0005640//nuclear outer membrane;GO:0005737//cytoplasm;GO:0005886//plasma membrane;GO:0009986//cell surface;GO:0016020//membrane;GO:0016021//integral component of membrane;GO:0016363//nuclear matrix;GO:0030141//secretory granule	GO:0004888//transmembrane signaling receptor activity;GO:0004930//G protein-coupled receptor activity;GO:0008528//G protein-coupled peptide receptor activity;GO:0016520//growth hormone-releasing hormone receptor activity;GO:0017046//peptide hormone binding;GO:0019838//growth factor binding	GO:0007166//cell surface receptor signaling pathway;GO:0007186//G protein-coupled receptor signaling pathway;GO:0007188//adenylate cyclase-modulating G protein-coupled receptor signaling pathway;GO:0007189//adenylate cyclase-activating G protein-coupled receptor signaling pathway;GO:0007595//lactation;GO:0008284//positive regulation of cell proliferation;GO:0008340//determination of adult lifespa…
novel_circ_009412	ENSBTAG00000021688	ENSBTAG00000055197	0.929284	1	3	1	bta-miR-33a	0.0258621	-	AAI42394.1 LOC404176 protein [Bos taurus]	-	-	-	-	GO:0009897//external side of plasma membrane;GO:0042571//immunoglobulin complex, circulating	GO:0003823//antigen binding;GO:0034987//immunoglobulin receptor binding	GO:0006910//phagocytosis, recognition;GO:0006911//phagocytosis, engulfment;GO:0006958//complement activation, classical pathway;GO:0042742//defense response to bacterium;GO:0045087//innate immune response;GO:0050853//B cell receptor signaling pathway;GO:0050871//positive regulation of B cell activation
novel_circ_009442	ENSBTAG00000054123	ENSBTAG00000002640	0.951398	8	2	2	bta-miR-211|miR-211-x	0.0041979	KALRN	kalirin RhoGEF kinase [Source:VGNC Symbol;Acc:VGNC:30389]	-	-	-	-	-	GO:0000166//nucleotide binding;GO:0005085//guanyl-nucleotide exchange factor activity;GO:0005515//protein binding	GO:0007411//axon guidance;GO:0007417//central nervous system development;GO:0050790//regulation of catalytic activity
novel_circ_009442	ENSBTAG00000054123	ENSBTAG00000002997	0.920613	8	4	3	bta-miR-218|miR-218-x|miR-218-z	0.00085444	ADAMTSL1	ADAMTS like 1 [Source:VGNC Symbol;Acc:VGNC:58359]	-	-	-	-	GO:0031012//extracellular matrix	GO:0004222//metalloendopeptidase activity	GO:0006508//proteolysis;GO:0030198//extracellular matrix organization
novel_circ_009442	ENSBTAG00000054123	ENSBTAG00000003574	0.974155	8	4	2	bta-miR-211|miR-211-x	0.0234492	SHISAL1	shisa like 1 [Source:VGNC Symbol;Acc:VGNC:30574]	-	-	-	-	GO:0016020//membrane;GO:0016021//integral component of membrane	-	-
novel_circ_009442	ENSBTAG00000054123	ENSBTAG00000003827	0.918951	8	7	3	bta-miR-211|miR-211-x|miR-382-x	0.00674981	RIMS2	regulating synaptic membrane exocytosis 2 [Source:VGNC Symbol;Acc:VGNC:33972]	Organismal Systems	Endocrine system	ko04911//Insulin secretion	K15297	GO:0016020//membrane	GO:0031267//small GTPase binding	GO:0006887//exocytosis
novel_circ_009442	ENSBTAG00000054123	ENSBTAG00000005012	0.934243	8	2	2	bta-miR-211|miR-211-x	0.0041979	HSPH1	heat shock protein family H (Hsp110) member 1 [Source:VGNC Symbol;Acc:VGNC:53817]	Genetic Information Processing	Folding, sorting and degradation	ko04141//Protein processing in endoplasmic reticulum	K09485	GO:0005654//nucleoplasm;GO:0005737//cytoplasm;GO:0005829//cytosol;GO:0005874//microtubule;GO:0032991//protein-containing complex	GO:0000774//adenyl-nucleotide exchange factor activity;GO:0043014//alpha-tubulin binding	GO:0051085//chaperone cofactor-dependent protein refolding
novel_circ_009442	ENSBTAG00000054123	ENSBTAG00000005104	0.933148	8	3	2	bta-miR-218|miR-218-x	0.0121518	MGAT5B	alpha-1,6-mannosylglycoprotein 6-beta-N-acetylglucosaminyltransferase B [Source:VGNC Symbol;Acc:VGNC:55847]	Metabolism;Metabolism;Metabolism	Global and overview maps;Glycan biosynthesis and metabolism;Glycan biosynthesis and metabolism	ko01100//Metabolic pathways;ko00510//N-Glycan biosynthesis;ko00515//Mannose type O-glycan biosyntheis	K09661;K09661;K09661	GO:0000139//Golgi membrane;GO:0005794//Golgi apparatus;GO:0016020//membrane;GO:0016021//integral component of membrane	GO:0016740//transferase activity;GO:0016757//transferase activity, transferring glycosyl groups;GO:0030144//alpha-1,6-mannosylglycoprotein 6-beta-N-acetylglucosaminyltransferase activity;GO:0030145//manganese ion binding	GO:0006486//protein glycosylation;GO:0006487//protein N-linked glycosylation;GO:0018215//protein phosphopantetheinylation;GO:0018242//protein O-linked glycosylation via serine
novel_circ_009442	ENSBTAG00000054123	ENSBTAG00000005230	0.985468	8	3	2	bta-miR-211|miR-211-x	0.0121518	SHOX2	short stature homeobox 2 [Source:VGNC Symbol;Acc:VGNC:34606]	-	-	-	-	GO:0005634//nucleus	GO:0000981//DNA-binding transcription factor activity, RNA polymerase II-specific;GO:0003677//DNA binding;GO:1990837//sequence-specific double-stranded DNA binding	GO:0000122//negative regulation of transcription by RNA polymerase II;GO:0001649//osteoblast differentiation;GO:0002027//regulation of heart rate;GO:0002053//positive regulation of mesenchymal cell proliferation;GO:0002062//chondrocyte differentiation;GO:0002063//chondrocyte development;GO:0003163//sinoatrial node development;GO:0003170//heart valve development;GO:0003209//cardiac atrium morphoge…
novel_circ_009442	ENSBTAG00000054123	ENSBTAG00000009338	0.993003	8	4	3	bta-miR-218|miR-218-x|miR-218-z	0.00085444	LRRC7	leucine rich repeat containing 7 [Source:VGNC Symbol;Acc:VGNC:55251]	-	-	-	-	-	GO:0005515//protein binding	-
novel_circ_009442	ENSBTAG00000054123	ENSBTAG00000014194	0.934395	8	11	6	bta-miR-218|miR-101-x|miR-211-x|miR-218-x|miR-218-z|miR-382-x	4.0254e-06	ADARB2	adenosine deaminase RNA specific B2 (inactive) [Source:NCBI gene (formerly Entrezgene);Acc:524061]	-	-	-	-	GO:0005730//nucleolus;GO:0005737//cytoplasm	GO:0003723//RNA binding;GO:0003725//double-stranded RNA binding;GO:0003726//double-stranded RNA adenosine deaminase activity;GO:0004000//adenosine deaminase activity;GO:0008251//tRNA-specific adenosine deaminase activity	GO:0006382//adenosine to inosine editing;GO:0006396//RNA processing
novel_circ_009442	ENSBTAG00000054123	ENSBTAG00000017420	0.931003	8	3	3	bta-miR-218|miR-218-x|miR-218-z	0.000220942	ZMAT4	zinc finger matrin-type 4 [Source:VGNC Symbol;Acc:VGNC:37193]	-	-	-	-	-	GO:0003676//nucleic acid binding;GO:0008270//zinc ion binding	-
novel_circ_009442	ENSBTAG00000054123	ENSBTAG00000017802	0.953925	8	4	2	bta-miR-211|miR-211-x	0.0234492	THRB	thyroid hormone receptor beta [Source:VGNC Symbol;Acc:VGNC:35847]	Environmental Information Processing;Organismal Systems	Signaling molecules and interaction;Endocrine system	ko04080//Neuroactive ligand-receptor interaction;ko04919//Thyroid hormone signaling pathway	K08362;K08362	GO:0005634//nucleus;GO:0016604//nuclear body	GO:0000978//RNA polymerase II proximal promoter sequence-specific DNA binding;GO:0001225//RNA polymerase II transcription coactivator binding;GO:0003677//DNA binding;GO:0003682//chromatin binding;GO:0003700//DNA-binding transcription factor activity;GO:0004879//nuclear receptor activity;GO:0008270//zinc ion binding;GO:0019899//enzyme binding;GO:0031490//chromatin DNA binding;GO:0043565//sequence-…	GO:0000122//negative regulation of transcription by RNA polymerase II;GO:0002154//thyroid hormone mediated signaling pathway;GO:0006355//regulation of transcription, DNA-templated;GO:0006357//regulation of transcription by RNA polymerase II;GO:0007605//sensory perception of sound;GO:0007621//negative regulation of female receptivity;GO:0008016//regulation of heart contraction;GO:0008050//female c…
novel_circ_009442	ENSBTAG00000054123	ENSBTAG00000019008	0.942766	8	5	2	bta-miR-211|miR-211-x	0.0377054	FBXL16	F-box and leucine rich repeat protein 16 [Source:VGNC Symbol;Acc:VGNC:52773]	-	-	-	-	GO:0019005//SCF ubiquitin ligase complex	GO:0005515//protein binding	GO:0031146//SCF-dependent proteasomal ubiquitin-dependent protein catabolic process
novel_circ_009442	ENSBTAG00000054123	ENSBTAG00000020318	0.95331	8	5	3	bta-miR-218|miR-211-x|miR-218-x	0.00206487	DBNDD1	dysbindin domain containing 1 [Source:VGNC Symbol;Acc:VGNC:27891]	-	-	-	-	GO:0005737//cytoplasm	-	-
novel_circ_009442	ENSBTAG00000054123	ENSBTAG00000049058	0.958354	8	8	4	bta-miR-211|bta-miR-218|miR-211-x|miR-218-x	0.000608739	INHBB	inhibin subunit beta B [Source:VGNC Symbol;Acc:VGNC:30201]	Environmental Information Processing;Cellular Processes;Environmental Information Processing	Signaling molecules and interaction;Cellular community - eukaryotes;Signal transduction	ko04060//Cytokine-cytokine receptor interaction;ko04550//Signaling pathways regulating pluripotency of stem cells;ko04350//TGF-beta signaling pathway	K22687;K22687;K22687	GO:0005576//extracellular region;GO:0005615//extracellular space;GO:0048471//perinuclear region of cytoplasm;GO:0071944//cell periphery	GO:0005125//cytokine activity;GO:0005179//hormone activity;GO:0008083//growth factor activity;GO:0042803//protein homodimerization activity	GO:0009267//cellular response to starvation;GO:0009611//response to wounding;GO:0010862//positive regulation of pathway-restricted SMAD protein phosphorylation;GO:0032686//negative regulation of hepatocyte growth factor production;GO:0032869//cellular response to insulin stimulus;GO:0032924//activin receptor signaling pathway;GO:0044320//cellular response to leptin stimulus;GO:0045444//fat cell d…
novel_circ_009442	ENSBTAG00000054123	ENSBTAG00000051600	0.943702	8	4	2	bta-miR-218|miR-218-x	0.0234492	-	XP_032263750.1 A-kinase anchoring protein 7 isoform X3 [Phoca vitulina]	-	-	-	-	GO:0005829//cytosol	GO:0034237//protein kinase A regulatory subunit binding	GO:0010738//regulation of protein kinase A signaling
novel_circ_009544	ENSBTAG00000054557	ENSBTAG00000005230	0.951985	16	3	2	miR-211-x|miR-497-y	0.0495542	SHOX2	short stature homeobox 2 [Source:VGNC Symbol;Acc:VGNC:34606]	-	-	-	-	GO:0005634//nucleus	GO:0000981//DNA-binding transcription factor activity, RNA polymerase II-specific;GO:0003677//DNA binding;GO:1990837//sequence-specific double-stranded DNA binding	GO:0000122//negative regulation of transcription by RNA polymerase II;GO:0001649//osteoblast differentiation;GO:0002027//regulation of heart rate;GO:0002053//positive regulation of mesenchymal cell proliferation;GO:0002062//chondrocyte differentiation;GO:0002063//chondrocyte development;GO:0003163//sinoatrial node development;GO:0003170//heart valve development;GO:0003209//cardiac atrium morphoge…
novel_circ_009544	ENSBTAG00000054557	ENSBTAG00000014758	0.994126	16	3	2	bta-miR-33a|miR-497-y	0.0495542	WIF1	WNT inhibitory factor 1 [Source:VGNC Symbol;Acc:VGNC:36938]	Environmental Information Processing	Signal transduction	ko04310//Wnt signaling pathway	K01691	GO:0005576//extracellular region;GO:0009986//cell surface	GO:0005102//signaling receptor binding	GO:0045600//positive regulation of fat cell differentiation;GO:0048856//anatomical structure development
novel_circ_009544	ENSBTAG00000054557	ENSBTAG00000047599	0.916974	16	2	2	bta-miR-218|bta-miR-33a	0.017991	GHRHR	growth hormone releasing hormone receptor [Source:VGNC Symbol;Acc:VGNC:29350]	Environmental Information Processing;Organismal Systems	Signaling molecules and interaction;Endocrine system	ko04080//Neuroactive ligand-receptor interaction;ko04935//Growth hormone synthesis, secretion and action	K04584;K04584	GO:0005637//nuclear inner membrane;GO:0005640//nuclear outer membrane;GO:0005737//cytoplasm;GO:0005886//plasma membrane;GO:0009986//cell surface;GO:0016020//membrane;GO:0016021//integral component of membrane;GO:0016363//nuclear matrix;GO:0030141//secretory granule	GO:0004888//transmembrane signaling receptor activity;GO:0004930//G protein-coupled receptor activity;GO:0008528//G protein-coupled peptide receptor activity;GO:0016520//growth hormone-releasing hormone receptor activity;GO:0017046//peptide hormone binding;GO:0019838//growth factor binding	GO:0007166//cell surface receptor signaling pathway;GO:0007186//G protein-coupled receptor signaling pathway;GO:0007188//adenylate cyclase-modulating G protein-coupled receptor signaling pathway;GO:0007189//adenylate cyclase-activating G protein-coupled receptor signaling pathway;GO:0007595//lactation;GO:0008284//positive regulation of cell proliferation;GO:0008340//determination of adult lifespa…
novel_circ_009544	ENSBTAG00000054557	ENSBTAG00000055197	0.943964	16	3	2	bta-miR-302b|bta-miR-33a	0.0495542	-	AAI42394.1 LOC404176 protein [Bos taurus]	-	-	-	-	GO:0009897//external side of plasma membrane;GO:0042571//immunoglobulin complex, circulating	GO:0003823//antigen binding;GO:0034987//immunoglobulin receptor binding	GO:0006910//phagocytosis, recognition;GO:0006911//phagocytosis, engulfment;GO:0006958//complement activation, classical pathway;GO:0042742//defense response to bacterium;GO:0045087//innate immune response;GO:0050853//B cell receptor signaling pathway;GO:0050871//positive regulation of B cell activation
novel_circ_009552	ENSBTAG00000014991	ENSBTAG00000017411	0.90262	2	1	1	bta-miR-144	0.0172414	AK5	adenylate kinase 5 [Source:VGNC Symbol;Acc:VGNC:25774]	Metabolism;Metabolism;Metabolism	Global and overview maps;Nucleotide metabolism;Metabolism of cofactors and vitamins	ko01100//Metabolic pathways;ko00230//Purine metabolism;ko00730//Thiamine metabolism	K00939;K00939;K00939	GO:0005737//cytoplasm;GO:0005829//cytosol;GO:0034451//centriolar satellite	GO:0004017//adenylate kinase activity;GO:0004550//nucleoside diphosphate kinase activity;GO:0005524//ATP binding;GO:0016301//kinase activity;GO:0016740//transferase activity;GO:0019205//nucleobase-containing compound kinase activity	GO:0006139//nucleobase-containing compound metabolic process;GO:0006165//nucleoside diphosphate phosphorylation;GO:0009142//nucleoside triphosphate biosynthetic process;GO:0016310//phosphorylation;GO:0046034//ATP metabolic process;GO:0046940//nucleoside monophosphate phosphorylation
novel_circ_009605	ENSBTAG00000001739	ENSBTAG00000014758	0.91277	1	3	1	bta-miR-33a	0.0258621	WIF1	WNT inhibitory factor 1 [Source:VGNC Symbol;Acc:VGNC:36938]	Environmental Information Processing	Signal transduction	ko04310//Wnt signaling pathway	K01691	GO:0005576//extracellular region;GO:0009986//cell surface	GO:0005102//signaling receptor binding	GO:0045600//positive regulation of fat cell differentiation;GO:0048856//anatomical structure development
novel_circ_009605	ENSBTAG00000001739	ENSBTAG00000047599	0.930918	1	2	1	bta-miR-33a	0.0172414	GHRHR	growth hormone releasing hormone receptor [Source:VGNC Symbol;Acc:VGNC:29350]	Environmental Information Processing;Organismal Systems	Signaling molecules and interaction;Endocrine system	ko04080//Neuroactive ligand-receptor interaction;ko04935//Growth hormone synthesis, secretion and action	K04584;K04584	GO:0005637//nuclear inner membrane;GO:0005640//nuclear outer membrane;GO:0005737//cytoplasm;GO:0005886//plasma membrane;GO:0009986//cell surface;GO:0016020//membrane;GO:0016021//integral component of membrane;GO:0016363//nuclear matrix;GO:0030141//secretory granule	GO:0004888//transmembrane signaling receptor activity;GO:0004930//G protein-coupled receptor activity;GO:0008528//G protein-coupled peptide receptor activity;GO:0016520//growth hormone-releasing hormone receptor activity;GO:0017046//peptide hormone binding;GO:0019838//growth factor binding	GO:0007166//cell surface receptor signaling pathway;GO:0007186//G protein-coupled receptor signaling pathway;GO:0007188//adenylate cyclase-modulating G protein-coupled receptor signaling pathway;GO:0007189//adenylate cyclase-activating G protein-coupled receptor signaling pathway;GO:0007595//lactation;GO:0008284//positive regulation of cell proliferation;GO:0008340//determination of adult lifespa…
novel_circ_009605	ENSBTAG00000001739	ENSBTAG00000055197	0.913271	1	3	1	bta-miR-33a	0.0258621	-	AAI42394.1 LOC404176 protein [Bos taurus]	-	-	-	-	GO:0009897//external side of plasma membrane;GO:0042571//immunoglobulin complex, circulating	GO:0003823//antigen binding;GO:0034987//immunoglobulin receptor binding	GO:0006910//phagocytosis, recognition;GO:0006911//phagocytosis, engulfment;GO:0006958//complement activation, classical pathway;GO:0042742//defense response to bacterium;GO:0045087//innate immune response;GO:0050853//B cell receptor signaling pathway;GO:0050871//positive regulation of B cell activation
novel_circ_009746	ENSBTAG00000053901	ENSBTAG00000014758	0.911121	12	3	2	bta-miR-33a|miR-497-y	0.0279492	WIF1	WNT inhibitory factor 1 [Source:VGNC Symbol;Acc:VGNC:36938]	Environmental Information Processing	Signal transduction	ko04310//Wnt signaling pathway	K01691	GO:0005576//extracellular region;GO:0009986//cell surface	GO:0005102//signaling receptor binding	GO:0045600//positive regulation of fat cell differentiation;GO:0048856//anatomical structure development
novel_circ_009948	ENSBTAG00000007441	ENSBTAG00000005917	0.91283	6	8	3	bta-miR-507-3p|bta-miR-7865|miR-200-x	0.00399139	PARD6G	par-6 family cell polarity regulator gamma [Source:VGNC Symbol;Acc:VGNC:32585]	Human Diseases;Environmental Information Processing;Cellular Processes;Cellular Processes;Organismal Systems;Environmental Information Processing	Infectious diseases;Signal transduction;Transport and catabolism;Cellular community - eukaryotes;Development;Signal transduction	ko05165//Human papillomavirus infection;ko04015//Rap1 signaling pathway;ko04144//Endocytosis;ko04530//Tight junction;ko04360//Axon guidance;ko04390//Hippo signaling pathway	K06093;K06093;K06093;K06093;K06093;K06093	GO:0005634//nucleus;GO:0005737//cytoplasm;GO:0005923//bicellular tight junction;GO:0005938//cell cortex;GO:0016020//membrane;GO:0016324//apical plasma membrane	GO:0005080//protein kinase C binding;GO:0005515//protein binding	GO:0007049//cell cycle;GO:0007098//centrosome cycle;GO:0007163//establishment or maintenance of cell polarity;GO:0051301//cell division;GO:0060341//regulation of cellular localization
novel_circ_009948	ENSBTAG00000007441	ENSBTAG00000020159	0.983845	6	5	2	bta-miR-137|bta-miR-7865	0.0209419	NKAIN1	sodium/potassium transporting ATPase interacting 1 [Source:VGNC Symbol;Acc:VGNC:32091]	-	-	-	-	GO:0005886//plasma membrane;GO:0016020//membrane;GO:0016021//integral component of membrane	GO:0051117//ATPase binding	-
novel_circ_010532	ENSBTAG00000000285	ENSBTAG00000002997	0.949626	1	4	1	miR-218-x	0.0344828	ADAMTSL1	ADAMTS like 1 [Source:VGNC Symbol;Acc:VGNC:58359]	-	-	-	-	GO:0031012//extracellular matrix	GO:0004222//metalloendopeptidase activity	GO:0006508//proteolysis;GO:0030198//extracellular matrix organization
novel_circ_010532	ENSBTAG00000000285	ENSBTAG00000013499	0.987269	1	4	1	miR-218-x	0.0344828	LHX9	LIM homeobox 9 [Source:VGNC Symbol;Acc:VGNC:30878]	-	-	-	-	GO:0005634//nucleus	GO:0000981//DNA-binding transcription factor activity, RNA polymerase II-specific;GO:0003677//DNA binding;GO:0046872//metal ion binding;GO:1990837//sequence-specific double-stranded DNA binding	GO:0006355//regulation of transcription, DNA-templated;GO:0006357//regulation of transcription by RNA polymerase II;GO:0008283//cell proliferation;GO:0008584//male gonad development;GO:0008585//female gonad development;GO:0035262//gonad morphogenesis
novel_circ_010532	ENSBTAG00000000285	ENSBTAG00000020318	0.915301	1	5	1	miR-218-x	0.0431035	DBNDD1	dysbindin domain containing 1 [Source:VGNC Symbol;Acc:VGNC:27891]	-	-	-	-	GO:0005737//cytoplasm	-	-
novel_circ_010706	ENSBTAG00000039172	ENSBTAG00000000910	0.915036	13	3	2	bta-miR-33a|miR-382-x	0.0328257	SLC6A7	solute carrier family 6 member 7 [Source:VGNC Symbol;Acc:VGNC:34923]	Organismal Systems	Nervous system	ko04721//Synaptic vesicle cycle	K05040	GO:0005887//integral component of plasma membrane;GO:0016020//membrane;GO:0016021//integral component of membrane	GO:0015193//L-proline transmembrane transporter activity;GO:0015293//symporter activity	GO:0035524//proline transmembrane transport;GO:0035725//sodium ion transmembrane transport
novel_circ_010706	ENSBTAG00000039172	ENSBTAG00000005012	0.907245	13	2	2	bta-miR-211|miR-211-x	0.0116942	HSPH1	heat shock protein family H (Hsp110) member 1 [Source:VGNC Symbol;Acc:VGNC:53817]	Genetic Information Processing	Folding, sorting and degradation	ko04141//Protein processing in endoplasmic reticulum	K09485	GO:0005654//nucleoplasm;GO:0005737//cytoplasm;GO:0005829//cytosol;GO:0005874//microtubule;GO:0032991//protein-containing complex	GO:0000774//adenyl-nucleotide exchange factor activity;GO:0043014//alpha-tubulin binding	GO:0051085//chaperone cofactor-dependent protein refolding
novel_circ_010706	ENSBTAG00000039172	ENSBTAG00000008571	0.938248	13	3	3	bta-miR-135b|bta-miR-302b|miR-382-x	0.00112838	CUX2	cut like homeobox 2 [Source:VGNC Symbol;Acc:VGNC:27840]	-	-	-	-	GO:0005634//nucleus	GO:0000977//RNA polymerase II regulatory region sequence-specific DNA binding;GO:0000978//RNA polymerase II proximal promoter sequence-specific DNA binding;GO:0000981//DNA-binding transcription factor activity, RNA polymerase II-specific;GO:0001227//DNA-binding transcription repressor activity, RNA polymerase II-specific;GO:0003677//DNA binding;GO:0043565//sequence-specific DNA binding;GO:1990837…	GO:0000122//negative regulation of transcription by RNA polymerase II;GO:0006355//regulation of transcription, DNA-templated;GO:0006357//regulation of transcription by RNA polymerase II;GO:0007614//short-term memory;GO:0010628//positive regulation of gene expression;GO:0045892//negative regulation of transcription, DNA-templated;GO:0050775//positive regulation of dendrite morphogenesis;GO:0050890…
novel_circ_010706	ENSBTAG00000039172	ENSBTAG00000016058	0.956226	13	2	2	bta-miR-144|miR-3535-z	0.0116942	FAM83B	family with sequence similarity 83 member B [Source:VGNC Symbol;Acc:VGNC:28833]	-	-	-	-	GO:0005737//cytoplasm;GO:0016020//membrane	GO:0005154//epidermal growth factor receptor binding;GO:0019901//protein kinase binding;GO:0036312//phosphatidylinositol 3-kinase regulatory subunit binding;GO:0036313//phosphatidylinositol 3-kinase catalytic subunit binding	GO:0007165//signal transduction;GO:0007173//epidermal growth factor receptor signaling pathway;GO:0008283//cell proliferation
novel_circ_010706	ENSBTAG00000039172	ENSBTAG00000019008	0.90694	13	5	3	bta-miR-135b|bta-miR-211|miR-211-x	0.00983412	FBXL16	F-box and leucine rich repeat protein 16 [Source:VGNC Symbol;Acc:VGNC:52773]	-	-	-	-	GO:0019005//SCF ubiquitin ligase complex	GO:0005515//protein binding	GO:0031146//SCF-dependent proteasomal ubiquitin-dependent protein catabolic process
novel_circ_010706	ENSBTAG00000039172	ENSBTAG00000019031	0.942036	13	5	3	bta-miR-211|bta-miR-33a|miR-211-x	0.00983412	PLPPR4	phospholipid phosphatase related 4 [Source:VGNC Symbol;Acc:VGNC:55657]	-	-	-	-	GO:0005887//integral component of plasma membrane;GO:0016020//membrane;GO:0016021//integral component of membrane;GO:0098978//glutamatergic synapse;GO:0099061//integral component of postsynaptic density membrane	GO:0008195//phosphatidate phosphatase activity;GO:0042577//lipid phosphatase activity	GO:0006644//phospholipid metabolic process;GO:0007165//signal transduction;GO:0007409//axonogenesis;GO:0046839//phospholipid dephosphorylation;GO:0048839//inner ear development
novel_circ_010706	ENSBTAG00000039172	ENSBTAG00000020087	0.900393	13	7	5	bta-miR-135b|bta-miR-144|bta-miR-455-5p|miR-101-x|miR-3535-z	0.000148819	CAMK2A	calcium/calmodulin dependent protein kinase II alpha [Source:VGNC Symbol;Acc:VGNC:26721]	Organismal Systems;Human Diseases;Environmental Information Processing;Environmental Information Processing;Human Diseases;Human Diseases;Cellular Processes;Organismal Systems;Environmental Information Processing;Human Diseases;Organismal Systems;Organismal Systems;Organismal Systems;Cellular Processes;Organismal Systems;Environmental Information Processing;Organismal Systems;Organismal Systems;O…	Sensory system;Cancers;Signal transduction;Signal transduction;Cancers;Infectious diseases;Cell growth and death;Development;Signal transduction;Endocrine and metabolic diseases;Circulatory system;Endocrine system;Nervous system;Cell growth and death;Nervous system;Signal transduction;Nervous system;Sensory system;Endocrine system;Environmental adaptation;Endocrine system;Endocrine system;Endocri…	ko04740//Olfactory transduction;ko05200//Pathways in cancer;ko04020//Calcium signaling pathway;ko04024//cAMP signaling pathway;ko05205//Proteoglycans in cancer;ko05152//Tuberculosis;ko04217//Necroptosis;ko04360//Axon guidance;ko04310//Wnt signaling pathway;ko04934//Cushing syndrome;ko04261//Adrenergic signaling in cardiomyocytes;ko04921//Oxytocin signaling pathway;ko04728//Dopaminergic synapse;ko…	K04515;K04515;K04515;K04515;K04515;K04515;K04515;K04515;K04515;K04515;K04515;K04515;K04515;K04515;K04515;K04515;K04515;K04515;K04515;K04515;K04515;K04515;K04515;K04515;K04515;K04515;K04515;K04515;K04515	GO:0005737//cytoplasm;GO:0005954//calcium- and calmodulin-dependent protein kinase complex;GO:0043005//neuron projection;GO:0043197//dendritic spine	GO:0000166//nucleotide binding;GO:0004672//protein kinase activity;GO:0004674//protein serine/threonine kinase activity;GO:0004683//calmodulin-dependent protein kinase activity;GO:0005516//calmodulin binding;GO:0005524//ATP binding;GO:0009931//calcium-dependent protein serine/threonine kinase activity;GO:0016301//kinase activity;GO:0042802//identical protein binding;GO:0042803//protein homodimeri…	GO:0006468//protein phosphorylation;GO:0016310//phosphorylation;GO:0038166//angiotensin-activated signaling pathway;GO:0051092//positive regulation of NF-kappaB transcription factor activity;GO:0060996//dendritic spine development;GO:1990443//peptidyl-threonine autophosphorylation;GO:2001222//regulation of neuron migration
novel_circ_010706	ENSBTAG00000039172	ENSBTAG00000046332	0.911628	13	3	2	bta-miR-211|miR-211-x	0.0328257	ACTA1	actin alpha 1, skeletal muscle [Source:VGNC Symbol;Acc:VGNC:25573]	-	-	-	-	GO:0001725//stress fiber;GO:0005865//striated muscle thin filament;GO:0005884//actin filament;GO:0015629//actin cytoskeleton;GO:0030017//sarcomere	-	GO:0030240//skeletal muscle thin filament assembly;GO:0048741//skeletal muscle fiber development
novel_circ_010706	ENSBTAG00000039172	ENSBTAG00000049223	0.912996	13	3	2	bta-miR-144|miR-18-x	0.0328257	SPTSSB	serine palmitoyltransferase small subunit B [Source:NCBI gene (formerly Entrezgene);Acc:780785]	-	-	-	-	GO:0017059//serine C-palmitoyltransferase complex	GO:0004758//serine C-palmitoyltransferase activity	GO:0007029//endoplasmic reticulum organization;GO:0030148//sphingolipid biosynthetic process;GO:0046513//ceramide biosynthetic process;GO:1904220//regulation of serine C-palmitoyltransferase activity
novel_circ_010709	ENSBTAG00000003718	ENSBTAG00000008512	0.953304	2	2	1	bta-miR-455-3p	0.0343328	KCNV1	potassium voltage-gated channel modifier subfamily V member 1 [Source:VGNC Symbol;Acc:VGNC:30497]	-	-	-	-	GO:0008076//voltage-gated potassium channel complex;GO:0016020//membrane;GO:0016021//integral component of membrane	GO:0005216//ion channel activity;GO:0005244//voltage-gated ion channel activity;GO:0005249//voltage-gated potassium channel activity;GO:0005267//potassium channel activity;GO:0005515//protein binding	GO:0006811//ion transport;GO:0006813//potassium ion transport;GO:0034765//regulation of ion transmembrane transport;GO:0051260//protein homooligomerization;GO:0055085//transmembrane transport;GO:0071805//potassium ion transmembrane transport
novel_circ_010709	ENSBTAG00000003718	ENSBTAG00000014384	0.937557	2	3	2	bta-miR-455-3p|miR-382-x	0.000449775	ZDHHC22	zinc finger DHHC-type palmitoyltransferase 22 [Source:VGNC Symbol;Acc:VGNC:37138]	-	-	-	-	GO:0005783//endoplasmic reticulum;GO:0005794//Golgi apparatus;GO:0005886//plasma membrane;GO:0016020//membrane;GO:0016021//integral component of membrane	GO:0016409//palmitoyltransferase activity;GO:0016740//transferase activity;GO:0016746//transferase activity, transferring acyl groups;GO:0019706//protein-cysteine S-palmitoyltransferase activity	GO:0006612//protein targeting to membrane;GO:0018215//protein phosphopantetheinylation;GO:0018230//peptidyl-L-cysteine S-palmitoylation;GO:0018345//protein palmitoylation;GO:0072659//protein localization to plasma membrane
novel_circ_010709	ENSBTAG00000003718	ENSBTAG00000019291	0.937435	2	1	1	bta-miR-455-3p	0.0172414	GRB14	growth factor receptor bound protein 14 [Source:VGNC Symbol;Acc:VGNC:29630]	-	-	-	-	GO:0005737//cytoplasm;GO:0005886//plasma membrane;GO:0043231//intracellular membrane-bounded organelle	GO:0030674//protein binding, bridging;GO:0030971//receptor tyrosine kinase binding	GO:0007165//signal transduction;GO:0008286//insulin receptor signaling pathway;GO:0046627//negative regulation of insulin receptor signaling pathway
novel_circ_010709	ENSBTAG00000003718	ENSBTAG00000021574	0.93559	2	4	2	bta-miR-455-3p|miR-382-x	0.00089955	TCF7L2	transcription factor 7 like 2 [Source:VGNC Symbol;Acc:VGNC:55976]	Human Diseases;Human Diseases;Human Diseases;Human Diseases;Environmental Information Processing;Environmental Information Processing;Human Diseases;Human Diseases;Human Diseases;Organismal Systems;Human Diseases;Human Diseases;Human Diseases;Cellular Processes;Human Diseases;Human Diseases;Human Diseases;Human Diseases	Cancers;Infectious diseases;Infectious diseases;Cancers;Signal transduction;Signal transduction;Endocrine and metabolic diseases;Cancers;Cancers;Endocrine system;Cancers;Cancers;Cardiovascular diseases;Cellular community - eukaryotes;Cancers;Cancers;Cancers;Cancers	ko05200//Pathways in cancer;ko05165//Human papillomavirus infection;ko05132//Salmonella infection;ko05225//Hepatocellular carcinoma;ko04310//Wnt signaling pathway;ko04390//Hippo signaling pathway;ko04934//Cushing syndrome;ko05226//Gastric cancer;ko05224//Breast cancer;ko04916//Melanogenesis;ko05215//Prostate cancer;ko05210//Colorectal cancer;ko05412//Arrhythmogenic right ventricular cardiomyopath…	K04491;K04491;K04491;K04491;K04491;K04491;K04491;K04491;K04491;K04491;K04491;K04491;K04491;K04491;K04491;K04491;K04491;K04491	GO:0000785//chromatin;GO:0005634//nucleus;GO:0005654//nucleoplasm;GO:0032993//protein-DNA complex;GO:0070369//beta-catenin-TCF7L2 complex;GO:0071664//catenin-TCF7L2 complex;GO:1990907//beta-catenin-TCF complex	GO:0000976//transcription regulatory region sequence-specific DNA binding;GO:0000978//RNA polymerase II proximal promoter sequence-specific DNA binding;GO:0000981//DNA-binding transcription factor activity, RNA polymerase II-specific;GO:0001103//RNA polymerase II repressing transcription factor binding;GO:0003677//DNA binding;GO:0003700//DNA-binding transcription factor activity;GO:0008013//beta-…	GO:0000122//negative regulation of transcription by RNA polymerase II;GO:0001568//blood vessel development;GO:0006357//regulation of transcription by RNA polymerase II;GO:0007050//cell cycle arrest;GO:0010909//positive regulation of heparan sulfate proteoglycan biosynthetic process;GO:0016055//Wnt signaling pathway;GO:0032024//positive regulation of insulin secretion;GO:0032092//positive regulati…
novel_circ_010709	ENSBTAG00000003718	ENSBTAG00000045633	0.927395	2	2	1	bta-miR-455-3p	0.0343328	AGTR1	angiotensin II receptor type 1 [Source:VGNC Symbol;Acc:VGNC:25745]	Human Diseases;Environmental Information Processing;Environmental Information Processing;Environmental Information Processing;Environmental Information Processing;Human Diseases;Organismal Systems;Environmental Information Processing;Organismal Systems;Human Diseases;Organismal Systems;Organismal Systems;Organismal Systems;Organismal Systems	Cancers;Signaling molecules and interaction;Signal transduction;Signal transduction;Signal transduction;Endocrine and metabolic diseases;Circulatory system;Signal transduction;Circulatory system;Endocrine and metabolic diseases;Endocrine system;Endocrine system;Endocrine system;Endocrine system	ko05200//Pathways in cancer;ko04080//Neuroactive ligand-receptor interaction;ko04020//Calcium signaling pathway;ko04022//cGMP - PKG signaling pathway;ko04072//Phospholipase D signaling pathway;ko04934//Cushing syndrome;ko04261//Adrenergic signaling in cardiomyocytes;ko04371//Apelin signaling pathway;ko04270//Vascular smooth muscle contraction;ko04933//AGE-RAGE signaling pathway in diabetic compli…	K04166;K04166;K04166;K04166;K04166;K04166;K04166;K04166;K04166;K04166;K04166;K04166;K04166;K04166	GO:0005886//plasma membrane;GO:0016021//integral component of membrane	GO:0001596//angiotensin type I receptor activity;GO:0004930//G protein-coupled receptor activity;GO:0004945//angiotensin type II receptor activity;GO:0031711//bradykinin receptor binding;GO:0046982//protein heterodimerization activity	GO:0001822//kidney development;GO:0007186//G protein-coupled receptor signaling pathway;GO:0007204//positive regulation of cytosolic calcium ion concentration;GO:0007266//Rho protein signal transduction;GO:0010873//positive regulation of cholesterol esterification;GO:0019229//regulation of vasoconstriction;GO:0019722//calcium-mediated signaling;GO:0032270//positive regulation of cellular protein …
novel_circ_010835	ENSBTAG00000015559	ENSBTAG00000001576	0.921857	2	1	1	bta-miR-135b	0.0172414	TMEM140	transmembrane protein 140 [Source:VGNC Symbol;Acc:VGNC:35973]	-	-	-	-	GO:0016020//membrane;GO:0016021//integral component of membrane	-	-
novel_circ_010835	ENSBTAG00000015559	ENSBTAG00000012144	0.945834	2	2	1	miR-10926-z	0.0343328	ZMYND19	zinc finger MYND-type containing 19 [Source:VGNC Symbol;Acc:VGNC:37205]	-	-	-	-	GO:0005737//cytoplasm;GO:0016020//membrane;GO:0045202//synapse	-	-
novel_circ_010835	ENSBTAG00000015559	ENSBTAG00000013974	0.920332	2	3	2	bta-miR-135b|miR-10926-z	0.000449775	TMEM215	transmembrane protein 215 [Source:VGNC Symbol;Acc:VGNC:36037]	-	-	-	-	-	-	-
novel_circ_011067	ENSBTAG00000014044	ENSBTAG00000013689	0.925037	2	2	1	miR-106-x	0.0343328	MCTP2	multiple C2 and transmembrane domain containing 2 [Source:VGNC Symbol;Acc:VGNC:31324]	-	-	-	-	GO:0005654//nucleoplasm;GO:0005829//cytosol;GO:0016020//membrane;GO:0016021//integral component of membrane;GO:0030672//synaptic vesicle membrane	GO:0005509//calcium ion binding	GO:0046928//regulation of neurotransmitter secretion
novel_circ_011081	ENSBTAG00000005249	ENSBTAG00000007036	0.906346	2	1	1	novel-m0101-3p	0.0172414	SLC17A7	solute carrier family 17 member 7 [Source:VGNC Symbol;Acc:VGNC:34702]	Organismal Systems;Organismal Systems;Organismal Systems;Human Diseases	Nervous system;Nervous system;Nervous system;Substance dependence	ko04723//Retrograde endocannabinoid signaling;ko04724//Glutamatergic synapse;ko04721//Synaptic vesicle cycle;ko05033//Nicotine addiction	K12302;K12302;K12302;K12302	GO:0016021//integral component of membrane	GO:0015319//sodium:inorganic phosphate symporter activity;GO:0022857//transmembrane transporter activity	GO:0055085//transmembrane transport
novel_circ_011173	ENSBTAG00000006734	ENSBTAG00000018383	0.945969	8	8	3	bta-miR-200b|bta-miR-429|miR-200-y	0.0104344	ATAD5	ATPase family AAA domain containing 5 [Source:VGNC Symbol;Acc:VGNC:26235]	-	-	-	-	GO:0005634//nucleus;GO:0031391//Elg1 RFC-like complex	GO:0003677//DNA binding;GO:0005524//ATP binding;GO:0016887//ATPase activity;GO:0061860//DNA clamp unloader activity	GO:0006974//cellular response to DNA damage stimulus;GO:0008283//cell proliferation;GO:0008630//intrinsic apoptotic signaling pathway in response to DNA damage;GO:0030890//positive regulation of B cell proliferation;GO:0033260//nuclear DNA replication;GO:0042770//signal transduction in response to DNA damage;GO:0042771//intrinsic apoptotic signaling pathway in response to DNA damage by p53 class …
novel_circ_011288	ENSBTAG00000020679	ENSBTAG00000006282	0.912801	9	4	2	novel-m0011-5p|novel-m0094-3p	0.0297853	POU2AF1	POU class 2 homeobox associating factor 1 [Source:VGNC Symbol;Acc:VGNC:33173]	-	-	-	-	GO:0090575//RNA polymerase II transcription factor complex	GO:0003677//DNA binding;GO:0003713//transcription coactivator activity	GO:0002314//germinal center B cell differentiation;GO:0032755//positive regulation of interleukin-6 production;GO:0045944//positive regulation of transcription by RNA polymerase II;GO:0098586//cellular response to virus
novel_circ_011288	ENSBTAG00000020679	ENSBTAG00000031346	0.903437	9	4	2	miR-11977-z|miR-485-y	0.0297853	ANKUB1	ankyrin repeat and ubiquitin domain containing 1 [Source:VGNC Symbol;Acc:VGNC:25948]	-	-	-	-	-	GO:0005515//protein binding	-
novel_circ_011316	ENSBTAG00000001257	ENSBTAG00000014758	0.926975	6	3	2	bta-miR-33a|miR-497-y	0.00658881	WIF1	WNT inhibitory factor 1 [Source:VGNC Symbol;Acc:VGNC:36938]	Environmental Information Processing	Signal transduction	ko04310//Wnt signaling pathway	K01691	GO:0005576//extracellular region;GO:0009986//cell surface	GO:0005102//signaling receptor binding	GO:0045600//positive regulation of fat cell differentiation;GO:0048856//anatomical structure development
novel_circ_011347	NA	ENSBTAG00000005104	0.900623	11	3	2	bta-miR-218|miR-218-x	0.0234356	MGAT5B	alpha-1,6-mannosylglycoprotein 6-beta-N-acetylglucosaminyltransferase B [Source:VGNC Symbol;Acc:VGNC:55847]	Metabolism;Metabolism;Metabolism	Global and overview maps;Glycan biosynthesis and metabolism;Glycan biosynthesis and metabolism	ko01100//Metabolic pathways;ko00510//N-Glycan biosynthesis;ko00515//Mannose type O-glycan biosyntheis	K09661;K09661;K09661	GO:0000139//Golgi membrane;GO:0005794//Golgi apparatus;GO:0016020//membrane;GO:0016021//integral component of membrane	GO:0016740//transferase activity;GO:0016757//transferase activity, transferring glycosyl groups;GO:0030144//alpha-1,6-mannosylglycoprotein 6-beta-N-acetylglucosaminyltransferase activity;GO:0030145//manganese ion binding	GO:0006486//protein glycosylation;GO:0006487//protein N-linked glycosylation;GO:0018215//protein phosphopantetheinylation;GO:0018242//protein O-linked glycosylation via serine
novel_circ_011347	NA	ENSBTAG00000009338	0.915194	11	4	3	bta-miR-218|miR-218-x|miR-218-z	0.0024657	LRRC7	leucine rich repeat containing 7 [Source:VGNC Symbol;Acc:VGNC:55251]	-	-	-	-	-	GO:0005515//protein binding	-
novel_circ_011425	ENSBTAG00000017727	ENSBTAG00000000199	0.968973	1	3	1	bta-miR-455-3p	0.0258621	PDP1	pyruvate dehyrogenase phosphatase catalytic subunit 1 [Source:VGNC Symbol;Acc:VGNC:32713]	-	-	-	-	-	GO:0004721//phosphoprotein phosphatase activity;GO:0004722//protein serine/threonine phosphatase activity;GO:0016787//hydrolase activity;GO:0016791//phosphatase activity;GO:0043169//cation binding;GO:0046872//metal ion binding	GO:0006470//protein dephosphorylation;GO:0035970//peptidyl-threonine dephosphorylation
novel_circ_011425	ENSBTAG00000017727	ENSBTAG00000008512	0.99591	1	2	1	bta-miR-455-3p	0.0172414	KCNV1	potassium voltage-gated channel modifier subfamily V member 1 [Source:VGNC Symbol;Acc:VGNC:30497]	-	-	-	-	GO:0008076//voltage-gated potassium channel complex;GO:0016020//membrane;GO:0016021//integral component of membrane	GO:0005216//ion channel activity;GO:0005244//voltage-gated ion channel activity;GO:0005249//voltage-gated potassium channel activity;GO:0005267//potassium channel activity;GO:0005515//protein binding	GO:0006811//ion transport;GO:0006813//potassium ion transport;GO:0034765//regulation of ion transmembrane transport;GO:0051260//protein homooligomerization;GO:0055085//transmembrane transport;GO:0071805//potassium ion transmembrane transport
novel_circ_011425	ENSBTAG00000017727	ENSBTAG00000014384	0.96533	1	3	1	bta-miR-455-3p	0.0258621	ZDHHC22	zinc finger DHHC-type palmitoyltransferase 22 [Source:VGNC Symbol;Acc:VGNC:37138]	-	-	-	-	GO:0005783//endoplasmic reticulum;GO:0005794//Golgi apparatus;GO:0005886//plasma membrane;GO:0016020//membrane;GO:0016021//integral component of membrane	GO:0016409//palmitoyltransferase activity;GO:0016740//transferase activity;GO:0016746//transferase activity, transferring acyl groups;GO:0019706//protein-cysteine S-palmitoyltransferase activity	GO:0006612//protein targeting to membrane;GO:0018215//protein phosphopantetheinylation;GO:0018230//peptidyl-L-cysteine S-palmitoylation;GO:0018345//protein palmitoylation;GO:0072659//protein localization to plasma membrane
novel_circ_011425	ENSBTAG00000017727	ENSBTAG00000016320	0.916016	1	3	1	bta-miR-455-3p	0.0258621	LMO1	LIM domain only 1 [Source:VGNC Symbol;Acc:VGNC:30933]	-	-	-	-	GO:0005634//nucleus	GO:0046872//metal ion binding	GO:0000122//negative regulation of transcription by RNA polymerase II;GO:0045944//positive regulation of transcription by RNA polymerase II;GO:0046013//regulation of T cell homeostatic proliferation
novel_circ_011425	ENSBTAG00000017727	ENSBTAG00000019291	0.978052	1	1	1	bta-miR-455-3p	0.00862069	GRB14	growth factor receptor bound protein 14 [Source:VGNC Symbol;Acc:VGNC:29630]	-	-	-	-	GO:0005737//cytoplasm;GO:0005886//plasma membrane;GO:0043231//intracellular membrane-bounded organelle	GO:0030674//protein binding, bridging;GO:0030971//receptor tyrosine kinase binding	GO:0007165//signal transduction;GO:0008286//insulin receptor signaling pathway;GO:0046627//negative regulation of insulin receptor signaling pathway
novel_circ_011425	ENSBTAG00000017727	ENSBTAG00000019497	0.958297	1	4	1	bta-miR-455-3p	0.0344828	ILDR2	immunoglobulin like domain containing receptor 2 [Source:VGNC Symbol;Acc:VGNC:30174]	-	-	-	-	GO:0016020//membrane;GO:0016021//integral component of membrane	-	GO:0009749//response to glucose;GO:0030073//insulin secretion;GO:0030154//cell differentiation;GO:0031016//pancreas development;GO:0048873//homeostasis of number of cells within a tissue
novel_circ_011425	ENSBTAG00000017727	ENSBTAG00000021574	0.996573	1	4	1	bta-miR-455-3p	0.0344828	TCF7L2	transcription factor 7 like 2 [Source:VGNC Symbol;Acc:VGNC:55976]	Human Diseases;Human Diseases;Human Diseases;Human Diseases;Environmental Information Processing;Environmental Information Processing;Human Diseases;Human Diseases;Human Diseases;Organismal Systems;Human Diseases;Human Diseases;Human Diseases;Cellular Processes;Human Diseases;Human Diseases;Human Diseases;Human Diseases	Cancers;Infectious diseases;Infectious diseases;Cancers;Signal transduction;Signal transduction;Endocrine and metabolic diseases;Cancers;Cancers;Endocrine system;Cancers;Cancers;Cardiovascular diseases;Cellular community - eukaryotes;Cancers;Cancers;Cancers;Cancers	ko05200//Pathways in cancer;ko05165//Human papillomavirus infection;ko05132//Salmonella infection;ko05225//Hepatocellular carcinoma;ko04310//Wnt signaling pathway;ko04390//Hippo signaling pathway;ko04934//Cushing syndrome;ko05226//Gastric cancer;ko05224//Breast cancer;ko04916//Melanogenesis;ko05215//Prostate cancer;ko05210//Colorectal cancer;ko05412//Arrhythmogenic right ventricular cardiomyopath…	K04491;K04491;K04491;K04491;K04491;K04491;K04491;K04491;K04491;K04491;K04491;K04491;K04491;K04491;K04491;K04491;K04491;K04491	GO:0000785//chromatin;GO:0005634//nucleus;GO:0005654//nucleoplasm;GO:0032993//protein-DNA complex;GO:0070369//beta-catenin-TCF7L2 complex;GO:0071664//catenin-TCF7L2 complex;GO:1990907//beta-catenin-TCF complex	GO:0000976//transcription regulatory region sequence-specific DNA binding;GO:0000978//RNA polymerase II proximal promoter sequence-specific DNA binding;GO:0000981//DNA-binding transcription factor activity, RNA polymerase II-specific;GO:0001103//RNA polymerase II repressing transcription factor binding;GO:0003677//DNA binding;GO:0003700//DNA-binding transcription factor activity;GO:0008013//beta-…	GO:0000122//negative regulation of transcription by RNA polymerase II;GO:0001568//blood vessel development;GO:0006357//regulation of transcription by RNA polymerase II;GO:0007050//cell cycle arrest;GO:0010909//positive regulation of heparan sulfate proteoglycan biosynthetic process;GO:0016055//Wnt signaling pathway;GO:0032024//positive regulation of insulin secretion;GO:0032092//positive regulati…
novel_circ_011425	ENSBTAG00000017727	ENSBTAG00000045633	0.941157	1	2	1	bta-miR-455-3p	0.0172414	AGTR1	angiotensin II receptor type 1 [Source:VGNC Symbol;Acc:VGNC:25745]	Human Diseases;Environmental Information Processing;Environmental Information Processing;Environmental Information Processing;Environmental Information Processing;Human Diseases;Organismal Systems;Environmental Information Processing;Organismal Systems;Human Diseases;Organismal Systems;Organismal Systems;Organismal Systems;Organismal Systems	Cancers;Signaling molecules and interaction;Signal transduction;Signal transduction;Signal transduction;Endocrine and metabolic diseases;Circulatory system;Signal transduction;Circulatory system;Endocrine and metabolic diseases;Endocrine system;Endocrine system;Endocrine system;Endocrine system	ko05200//Pathways in cancer;ko04080//Neuroactive ligand-receptor interaction;ko04020//Calcium signaling pathway;ko04022//cGMP - PKG signaling pathway;ko04072//Phospholipase D signaling pathway;ko04934//Cushing syndrome;ko04261//Adrenergic signaling in cardiomyocytes;ko04371//Apelin signaling pathway;ko04270//Vascular smooth muscle contraction;ko04933//AGE-RAGE signaling pathway in diabetic compli…	K04166;K04166;K04166;K04166;K04166;K04166;K04166;K04166;K04166;K04166;K04166;K04166;K04166;K04166	GO:0005886//plasma membrane;GO:0016021//integral component of membrane	GO:0001596//angiotensin type I receptor activity;GO:0004930//G protein-coupled receptor activity;GO:0004945//angiotensin type II receptor activity;GO:0031711//bradykinin receptor binding;GO:0046982//protein heterodimerization activity	GO:0001822//kidney development;GO:0007186//G protein-coupled receptor signaling pathway;GO:0007204//positive regulation of cytosolic calcium ion concentration;GO:0007266//Rho protein signal transduction;GO:0010873//positive regulation of cholesterol esterification;GO:0019229//regulation of vasoconstriction;GO:0019722//calcium-mediated signaling;GO:0032270//positive regulation of cellular protein …
novel_circ_011514	ENSBTAG00000015007	ENSBTAG00000051600	0.953299	1	4	1	bta-miR-302a	0.0344828	-	XP_032263750.1 A-kinase anchoring protein 7 isoform X3 [Phoca vitulina]	-	-	-	-	GO:0005829//cytosol	GO:0034237//protein kinase A regulatory subunit binding	GO:0010738//regulation of protein kinase A signaling
novel_circ_011518	ENSBTAG00000039922	ENSBTAG00000003776	0.920319	4	1	1	miR-382-x	0.0344828	MSANTD1	Myb/SANT DNA binding domain containing 1 [Source:VGNC Symbol;Acc:VGNC:31688]	-	-	-	-	GO:0016604//nuclear body	-	GO:0045893//positive regulation of transcription, DNA-templated
novel_circ_011567	ENSBTAG00000000737	ENSBTAG00000017866	0.955808	1	5	1	bta-miR-539	0.0431035	CD36	CD36 molecule [Source:NCBI gene (formerly Entrezgene);Acc:281052]	Cellular Processes;Organismal Systems;Environmental Information Processing;Human Diseases;Human Diseases;Environmental Information Processing;Organismal Systems;Organismal Systems;Organismal Systems;Organismal Systems	Transport and catabolism;Immune system;Signal transduction;Infectious diseases;Endocrine and metabolic diseases;Signaling molecules and interaction;Endocrine system;Endocrine system;Digestive system;Digestive system	ko04145//Phagosome;ko04640//Hematopoietic cell lineage;ko04152//AMPK signaling pathway;ko05144//Malaria;ko04931//Insulin resistance;ko04512//ECM-receptor interaction;ko03320//PPAR signaling pathway;ko04920//Adipocytokine signaling pathway;ko04979//Cholesterol metabolism;ko04975//Fat digestion and absorption	K06259;K06259;K06259;K06259;K06259;K06259;K06259;K06259;K06259;K06259	GO:0005794//Golgi apparatus;GO:0005886//plasma membrane;GO:0016020//membrane;GO:0016021//integral component of membrane;GO:0016324//apical plasma membrane	-	GO:0006955//immune response;GO:0007155//cell adhesion;GO:0007166//cell surface receptor signaling pathway
novel_circ_011682	ENSBTAG00000005869	ENSBTAG00000005012	0.956006	1	2	1	bta-miR-211	0.0172414	HSPH1	heat shock protein family H (Hsp110) member 1 [Source:VGNC Symbol;Acc:VGNC:53817]	Genetic Information Processing	Folding, sorting and degradation	ko04141//Protein processing in endoplasmic reticulum	K09485	GO:0005654//nucleoplasm;GO:0005737//cytoplasm;GO:0005829//cytosol;GO:0005874//microtubule;GO:0032991//protein-containing complex	GO:0000774//adenyl-nucleotide exchange factor activity;GO:0043014//alpha-tubulin binding	GO:0051085//chaperone cofactor-dependent protein refolding
novel_circ_011682	ENSBTAG00000005869	ENSBTAG00000017802	0.921058	1	4	1	bta-miR-211	0.0344828	THRB	thyroid hormone receptor beta [Source:VGNC Symbol;Acc:VGNC:35847]	Environmental Information Processing;Organismal Systems	Signaling molecules and interaction;Endocrine system	ko04080//Neuroactive ligand-receptor interaction;ko04919//Thyroid hormone signaling pathway	K08362;K08362	GO:0005634//nucleus;GO:0016604//nuclear body	GO:0000978//RNA polymerase II proximal promoter sequence-specific DNA binding;GO:0001225//RNA polymerase II transcription coactivator binding;GO:0003677//DNA binding;GO:0003682//chromatin binding;GO:0003700//DNA-binding transcription factor activity;GO:0004879//nuclear receptor activity;GO:0008270//zinc ion binding;GO:0019899//enzyme binding;GO:0031490//chromatin DNA binding;GO:0043565//sequence-…	GO:0000122//negative regulation of transcription by RNA polymerase II;GO:0002154//thyroid hormone mediated signaling pathway;GO:0006355//regulation of transcription, DNA-templated;GO:0006357//regulation of transcription by RNA polymerase II;GO:0007605//sensory perception of sound;GO:0007621//negative regulation of female receptivity;GO:0008016//regulation of heart contraction;GO:0008050//female c…
novel_circ_011682	ENSBTAG00000005869	ENSBTAG00000019008	0.922847	1	5	1	bta-miR-211	0.0431035	FBXL16	F-box and leucine rich repeat protein 16 [Source:VGNC Symbol;Acc:VGNC:52773]	-	-	-	-	GO:0019005//SCF ubiquitin ligase complex	GO:0005515//protein binding	GO:0031146//SCF-dependent proteasomal ubiquitin-dependent protein catabolic process
novel_circ_011813	ENSBTAG00000017350	ENSBTAG00000002390	0.925232	4	1	1	miR-10926-z	0.0344828	CCDC184	coiled-coil domain containing 184 [Source:VGNC Symbol;Acc:VGNC:26879]	-	-	-	-	GO:0005737//cytoplasm	-	-
novel_circ_011813	ENSBTAG00000017350	ENSBTAG00000002997	0.955954	4	4	3	bta-miR-218|miR-218-x|miR-218-z	6.27074e-05	ADAMTSL1	ADAMTS like 1 [Source:VGNC Symbol;Acc:VGNC:58359]	-	-	-	-	GO:0031012//extracellular matrix	GO:0004222//metalloendopeptidase activity	GO:0006508//proteolysis;GO:0030198//extracellular matrix organization
novel_circ_011813	ENSBTAG00000017350	ENSBTAG00000005104	0.929494	4	3	2	bta-miR-218|miR-218-x	0.00266709	MGAT5B	alpha-1,6-mannosylglycoprotein 6-beta-N-acetylglucosaminyltransferase B [Source:VGNC Symbol;Acc:VGNC:55847]	Metabolism;Metabolism;Metabolism	Global and overview maps;Glycan biosynthesis and metabolism;Glycan biosynthesis and metabolism	ko01100//Metabolic pathways;ko00510//N-Glycan biosynthesis;ko00515//Mannose type O-glycan biosyntheis	K09661;K09661;K09661	GO:0000139//Golgi membrane;GO:0005794//Golgi apparatus;GO:0016020//membrane;GO:0016021//integral component of membrane	GO:0016740//transferase activity;GO:0016757//transferase activity, transferring glycosyl groups;GO:0030144//alpha-1,6-mannosylglycoprotein 6-beta-N-acetylglucosaminyltransferase activity;GO:0030145//manganese ion binding	GO:0006486//protein glycosylation;GO:0006487//protein N-linked glycosylation;GO:0018215//protein phosphopantetheinylation;GO:0018242//protein O-linked glycosylation via serine
novel_circ_011813	ENSBTAG00000017350	ENSBTAG00000007109	0.961855	4	1	1	miR-10926-z	0.0344828	ASB2	ankyrin repeat and SOCS box containing 2 [Source:VGNC Symbol;Acc:VGNC:26196]	-	-	-	-	GO:0000151//ubiquitin ligase complex	GO:0005515//protein binding;GO:0061630//ubiquitin protein ligase activity	GO:0006511//ubiquitin-dependent protein catabolic process;GO:0016567//protein ubiquitination;GO:0035556//intracellular signal transduction;GO:0035914//skeletal muscle cell differentiation
novel_circ_011813	ENSBTAG00000017350	ENSBTAG00000007703	0.935267	4	4	2	bta-miR-218|miR-218-x	0.00527147	NMT2	N-myristoyltransferase 2 [Source:VGNC Symbol;Acc:VGNC:32138]	-	-	-	-	GO:0005737//cytoplasm;GO:0005794//Golgi apparatus;GO:0005829//cytosol;GO:0005886//plasma membrane;GO:0019898//extrinsic component of membrane	GO:0004379//glycylpeptide N-tetradecanoyltransferase activity;GO:0016740//transferase activity;GO:0016746//transferase activity, transferring acyl groups	GO:0006499//N-terminal protein myristoylation;GO:0018008//N-terminal peptidyl-glycine N-myristoylation
novel_circ_011813	ENSBTAG00000017350	ENSBTAG00000009338	0.934055	4	4	3	bta-miR-218|miR-218-x|miR-218-z	6.27074e-05	LRRC7	leucine rich repeat containing 7 [Source:VGNC Symbol;Acc:VGNC:55251]	-	-	-	-	-	GO:0005515//protein binding	-
novel_circ_011813	ENSBTAG00000017350	ENSBTAG00000011095	0.944162	4	6	2	miR-10926-z|miR-218-x	0.0128683	FAR2	fatty acyl-CoA reductase 2 [Source:VGNC Symbol;Acc:VGNC:28864]	Cellular Processes	Transport and catabolism	ko04146//Peroxisome	K13356	GO:0005777//peroxisome;GO:0005779//integral component of peroxisomal membrane	GO:0080019//fatty-acyl-CoA reductase (alcohol-forming) activity	GO:0035336//long-chain fatty-acyl-CoA metabolic process
novel_circ_011813	ENSBTAG00000017350	ENSBTAG00000014194	0.949078	4	11	4	bta-miR-218|miR-10926-z|miR-218-x|miR-218-z	4.60878e-05	ADARB2	adenosine deaminase RNA specific B2 (inactive) [Source:NCBI gene (formerly Entrezgene);Acc:524061]	-	-	-	-	GO:0005730//nucleolus;GO:0005737//cytoplasm	GO:0003723//RNA binding;GO:0003725//double-stranded RNA binding;GO:0003726//double-stranded RNA adenosine deaminase activity;GO:0004000//adenosine deaminase activity;GO:0008251//tRNA-specific adenosine deaminase activity	GO:0006382//adenosine to inosine editing;GO:0006396//RNA processing
novel_circ_011813	ENSBTAG00000017350	ENSBTAG00000017420	0.969994	4	3	3	bta-miR-218|miR-218-x|miR-218-z	1.57816e-05	ZMAT4	zinc finger matrin-type 4 [Source:VGNC Symbol;Acc:VGNC:37193]	-	-	-	-	-	GO:0003676//nucleic acid binding;GO:0008270//zinc ion binding	-
novel_circ_011813	ENSBTAG00000017350	ENSBTAG00000019625	0.962094	4	9	3	bta-miR-218|miR-218-x|miR-218-z	0.00127286	EHHADH	enoyl-CoA hydratase and 3-hydroxyacyl CoA dehydrogenase [Source:VGNC Symbol;Acc:VGNC:53541]	Metabolism;Metabolism;Cellular Processes;Organismal Systems;Metabolism;Metabolism;Metabolism;Metabolism;Metabolism;Metabolism;Metabolism;Metabolism	Global and overview maps;Global and overview maps;Transport and catabolism;Endocrine system;Amino acid metabolism;Global and overview maps;Amino acid metabolism;Amino acid metabolism;Lipid metabolism;Metabolism of other amino acids;Carbohydrate metabolism;Carbohydrate metabolism	ko01100//Metabolic pathways;ko01200//Carbon metabolism;ko04146//Peroxisome;ko03320//PPAR signaling pathway;ko00310//Lysine degradation;ko01212//Fatty acid metabolism;ko00280//Valine, leucine and isoleucine degradation;ko00380//Tryptophan metabolism;ko00071//Fatty acid degradation;ko00410//beta-Alanine metabolism;ko00640//Propanoate metabolism;ko00650//Butanoate metabolism	K07514;K07514;K07514;K07514;K07514;K07514;K07514;K07514;K07514;K07514;K07514;K07514	GO:0005777//peroxisome	GO:0003824//catalytic activity;GO:0003857//3-hydroxyacyl-CoA dehydrogenase activity;GO:0004300//enoyl-CoA hydratase activity;GO:0016491//oxidoreductase activity;GO:0016509//long-chain-3-hydroxyacyl-CoA dehydrogenase activity;GO:0016616//oxidoreductase activity, acting on the CH-OH group of donors, NAD or NADP as acceptor;GO:0019899//enzyme binding;GO:0070403//NAD+ binding	GO:0006629//lipid metabolic process;GO:0006631//fatty acid metabolic process;GO:0006635//fatty acid beta-oxidation;GO:0055114//oxidation-reduction process
novel_circ_011813	ENSBTAG00000017350	ENSBTAG00000038700	0.927767	4	3	2	bta-miR-218|miR-218-x	0.00266709	FAM124B	family with sequence similarity 124 member B [Source:VGNC Symbol;Acc:VGNC:56107]	-	-	-	-	GO:0005654//nucleoplasm;GO:0005739//mitochondrion	-	-
novel_circ_011813	ENSBTAG00000017350	ENSBTAG00000049058	0.952657	4	8	2	bta-miR-218|miR-218-x	0.0234492	INHBB	inhibin subunit beta B [Source:VGNC Symbol;Acc:VGNC:30201]	Environmental Information Processing;Cellular Processes;Environmental Information Processing	Signaling molecules and interaction;Cellular community - eukaryotes;Signal transduction	ko04060//Cytokine-cytokine receptor interaction;ko04550//Signaling pathways regulating pluripotency of stem cells;ko04350//TGF-beta signaling pathway	K22687;K22687;K22687	GO:0005576//extracellular region;GO:0005615//extracellular space;GO:0048471//perinuclear region of cytoplasm;GO:0071944//cell periphery	GO:0005125//cytokine activity;GO:0005179//hormone activity;GO:0008083//growth factor activity;GO:0042803//protein homodimerization activity	GO:0009267//cellular response to starvation;GO:0009611//response to wounding;GO:0010862//positive regulation of pathway-restricted SMAD protein phosphorylation;GO:0032686//negative regulation of hepatocyte growth factor production;GO:0032869//cellular response to insulin stimulus;GO:0032924//activin receptor signaling pathway;GO:0044320//cellular response to leptin stimulus;GO:0045444//fat cell d…
novel_circ_011850	ENSBTAG00000038181	ENSBTAG00000014194	0.910317	8	11	4	miR-101-x|miR-211-x|miR-218-x|miR-382-x	0.00262339	ADARB2	adenosine deaminase RNA specific B2 (inactive) [Source:NCBI gene (formerly Entrezgene);Acc:524061]	-	-	-	-	GO:0005730//nucleolus;GO:0005737//cytoplasm	GO:0003723//RNA binding;GO:0003725//double-stranded RNA binding;GO:0003726//double-stranded RNA adenosine deaminase activity;GO:0004000//adenosine deaminase activity;GO:0008251//tRNA-specific adenosine deaminase activity	GO:0006382//adenosine to inosine editing;GO:0006396//RNA processing
novel_circ_011850	ENSBTAG00000038181	ENSBTAG00000016455	0.924576	8	5	2	bta-miR-144|miR-211-x	0.0377054	CACHD1	cache domain containing 1 [Source:VGNC Symbol;Acc:VGNC:26671]	-	-	-	-	GO:0005891//voltage-gated calcium channel complex;GO:0016020//membrane;GO:0016021//integral component of membrane	GO:0005245//voltage-gated calcium channel activity	GO:0006811//ion transport;GO:0006816//calcium ion transport;GO:0070588//calcium ion transmembrane transport
novel_circ_011850	ENSBTAG00000038181	ENSBTAG00000020318	0.915301	8	5	2	miR-211-x|miR-218-x	0.0377054	DBNDD1	dysbindin domain containing 1 [Source:VGNC Symbol;Acc:VGNC:27891]	-	-	-	-	GO:0005737//cytoplasm	-	-
novel_circ_011987	ENSBTAG00000010437	ENSBTAG00000052280	0.928351	1	2	1	bta-miR-2339	0.0172414	NDUFA7	NADH:ubiquinone oxidoreductase subunit A7 [Source:NCBI gene (formerly Entrezgene);Acc:338063]	Metabolism;Human Diseases;Human Diseases;Organismal Systems;Human Diseases;Metabolism;Human Diseases;Organismal Systems	Global and overview maps;Neurodegenerative diseases;Neurodegenerative diseases;Environmental adaptation;Neurodegenerative diseases;Energy metabolism;Endocrine and metabolic diseases;Nervous system	ko01100//Metabolic pathways;ko05010//Alzheimer disease;ko05016//Huntington disease;ko04714//Thermogenesis;ko05012//Parkinson disease;ko00190//Oxidative phosphorylation;ko04932//Non-alcoholic fatty liver disease (NAFLD);ko04723//Retrograde endocannabinoid signaling	K03951;K03951;K03951;K03951;K03951;K03951;K03951;K03951	GO:0005743//mitochondrial inner membrane	GO:0008137//NADH dehydrogenase (ubiquinone) activity	GO:0042773//ATP synthesis coupled electron transport
novel_circ_011997	ENSBTAG00000014991	ENSBTAG00000001143	0.938381	5	1	1	bta-miR-144	0.0431035	-	DAA31379.1 TPA: Interferon-induced guanylate-binding protein 1 (GTP-binding protein 1) (Guanine nucleotide-binding protein 1) (HuGBP-1)-like protein [Bos taurus]	Organismal Systems	Immune system	ko04621//NOD-like receptor signaling pathway	K20899	GO:0031410//cytoplasmic vesicle	GO:0003924//GTPase activity;GO:0005525//GTP binding	GO:0071346//cellular response to interferon-gamma
novel_circ_011997	ENSBTAG00000014991	ENSBTAG00000002997	0.905411	5	4	2	miR-218-x|miR-497-y	0.00868196	ADAMTSL1	ADAMTS like 1 [Source:VGNC Symbol;Acc:VGNC:58359]	-	-	-	-	GO:0031012//extracellular matrix	GO:0004222//metalloendopeptidase activity	GO:0006508//proteolysis;GO:0030198//extracellular matrix organization
novel_circ_011997	ENSBTAG00000014991	ENSBTAG00000014508	0.904598	5	1	1	bta-miR-135b	0.0431035	FBXO40	F-box protein 40 [Source:VGNC Symbol;Acc:VGNC:28911]	-	-	-	-	GO:0005737//cytoplasm	GO:0005515//protein binding;GO:0008270//zinc ion binding;GO:0046872//metal ion binding;GO:0061630//ubiquitin protein ligase activity	GO:0016567//protein ubiquitination;GO:0042692//muscle cell differentiation
novel_circ_011997	ENSBTAG00000014991	ENSBTAG00000017411	0.941279	5	1	1	bta-miR-144	0.0431035	AK5	adenylate kinase 5 [Source:VGNC Symbol;Acc:VGNC:25774]	Metabolism;Metabolism;Metabolism	Global and overview maps;Nucleotide metabolism;Metabolism of cofactors and vitamins	ko01100//Metabolic pathways;ko00230//Purine metabolism;ko00730//Thiamine metabolism	K00939;K00939;K00939	GO:0005737//cytoplasm;GO:0005829//cytosol;GO:0034451//centriolar satellite	GO:0004017//adenylate kinase activity;GO:0004550//nucleoside diphosphate kinase activity;GO:0005524//ATP binding;GO:0016301//kinase activity;GO:0016740//transferase activity;GO:0019205//nucleobase-containing compound kinase activity	GO:0006139//nucleobase-containing compound metabolic process;GO:0006165//nucleoside diphosphate phosphorylation;GO:0009142//nucleoside triphosphate biosynthetic process;GO:0016310//phosphorylation;GO:0046034//ATP metabolic process;GO:0046940//nucleoside monophosphate phosphorylation
novel_circ_011997	ENSBTAG00000014991	ENSBTAG00000019625	0.923858	5	9	3	bta-miR-135b|bta-miR-144|miR-218-x	0.00305489	EHHADH	enoyl-CoA hydratase and 3-hydroxyacyl CoA dehydrogenase [Source:VGNC Symbol;Acc:VGNC:53541]	Metabolism;Metabolism;Cellular Processes;Organismal Systems;Metabolism;Metabolism;Metabolism;Metabolism;Metabolism;Metabolism;Metabolism;Metabolism	Global and overview maps;Global and overview maps;Transport and catabolism;Endocrine system;Amino acid metabolism;Global and overview maps;Amino acid metabolism;Amino acid metabolism;Lipid metabolism;Metabolism of other amino acids;Carbohydrate metabolism;Carbohydrate metabolism	ko01100//Metabolic pathways;ko01200//Carbon metabolism;ko04146//Peroxisome;ko03320//PPAR signaling pathway;ko00310//Lysine degradation;ko01212//Fatty acid metabolism;ko00280//Valine, leucine and isoleucine degradation;ko00380//Tryptophan metabolism;ko00071//Fatty acid degradation;ko00410//beta-Alanine metabolism;ko00640//Propanoate metabolism;ko00650//Butanoate metabolism	K07514;K07514;K07514;K07514;K07514;K07514;K07514;K07514;K07514;K07514;K07514;K07514	GO:0005777//peroxisome	GO:0003824//catalytic activity;GO:0003857//3-hydroxyacyl-CoA dehydrogenase activity;GO:0004300//enoyl-CoA hydratase activity;GO:0016491//oxidoreductase activity;GO:0016509//long-chain-3-hydroxyacyl-CoA dehydrogenase activity;GO:0016616//oxidoreductase activity, acting on the CH-OH group of donors, NAD or NADP as acceptor;GO:0019899//enzyme binding;GO:0070403//NAD+ binding	GO:0006629//lipid metabolic process;GO:0006631//fatty acid metabolic process;GO:0006635//fatty acid beta-oxidation;GO:0055114//oxidation-reduction process
novel_circ_012021	ENSBTAG00000006167	ENSBTAG00000051600	0.963802	2	4	2	bta-miR-302a|bta-miR-302b	0.00089955	-	XP_032263750.1 A-kinase anchoring protein 7 isoform X3 [Phoca vitulina]	-	-	-	-	GO:0005829//cytosol	GO:0034237//protein kinase A regulatory subunit binding	GO:0010738//regulation of protein kinase A signaling
novel_circ_012073	NA	ENSBTAG00000014758	0.952289	14	3	2	bta-miR-33a|miR-497-y	0.0380573	WIF1	WNT inhibitory factor 1 [Source:VGNC Symbol;Acc:VGNC:36938]	Environmental Information Processing	Signal transduction	ko04310//Wnt signaling pathway	K01691	GO:0005576//extracellular region;GO:0009986//cell surface	GO:0005102//signaling receptor binding	GO:0045600//positive regulation of fat cell differentiation;GO:0048856//anatomical structure development
novel_circ_012073	NA	ENSBTAG00000047599	0.985124	14	2	2	bta-miR-218|bta-miR-33a	0.0136432	GHRHR	growth hormone releasing hormone receptor [Source:VGNC Symbol;Acc:VGNC:29350]	Environmental Information Processing;Organismal Systems	Signaling molecules and interaction;Endocrine system	ko04080//Neuroactive ligand-receptor interaction;ko04935//Growth hormone synthesis, secretion and action	K04584;K04584	GO:0005637//nuclear inner membrane;GO:0005640//nuclear outer membrane;GO:0005737//cytoplasm;GO:0005886//plasma membrane;GO:0009986//cell surface;GO:0016020//membrane;GO:0016021//integral component of membrane;GO:0016363//nuclear matrix;GO:0030141//secretory granule	GO:0004888//transmembrane signaling receptor activity;GO:0004930//G protein-coupled receptor activity;GO:0008528//G protein-coupled peptide receptor activity;GO:0016520//growth hormone-releasing hormone receptor activity;GO:0017046//peptide hormone binding;GO:0019838//growth factor binding	GO:0007166//cell surface receptor signaling pathway;GO:0007186//G protein-coupled receptor signaling pathway;GO:0007188//adenylate cyclase-modulating G protein-coupled receptor signaling pathway;GO:0007189//adenylate cyclase-activating G protein-coupled receptor signaling pathway;GO:0007595//lactation;GO:0008284//positive regulation of cell proliferation;GO:0008340//determination of adult lifespa…
novel_circ_012073	NA	ENSBTAG00000055197	0.992842	14	3	2	bta-miR-302b|bta-miR-33a	0.0380573	-	AAI42394.1 LOC404176 protein [Bos taurus]	-	-	-	-	GO:0009897//external side of plasma membrane;GO:0042571//immunoglobulin complex, circulating	GO:0003823//antigen binding;GO:0034987//immunoglobulin receptor binding	GO:0006910//phagocytosis, recognition;GO:0006911//phagocytosis, engulfment;GO:0006958//complement activation, classical pathway;GO:0042742//defense response to bacterium;GO:0045087//innate immune response;GO:0050853//B cell receptor signaling pathway;GO:0050871//positive regulation of B cell activation
novel_circ_012184	ENSBTAG00000021313	ENSBTAG00000000910	0.93681	1	3	1	miR-382-x	0.0258621	SLC6A7	solute carrier family 6 member 7 [Source:VGNC Symbol;Acc:VGNC:34923]	Organismal Systems	Nervous system	ko04721//Synaptic vesicle cycle	K05040	GO:0005887//integral component of plasma membrane;GO:0016020//membrane;GO:0016021//integral component of membrane	GO:0015193//L-proline transmembrane transporter activity;GO:0015293//symporter activity	GO:0035524//proline transmembrane transport;GO:0035725//sodium ion transmembrane transport
novel_circ_012184	ENSBTAG00000021313	ENSBTAG00000007703	0.950802	1	4	1	miR-382-x	0.0344828	NMT2	N-myristoyltransferase 2 [Source:VGNC Symbol;Acc:VGNC:32138]	-	-	-	-	GO:0005737//cytoplasm;GO:0005794//Golgi apparatus;GO:0005829//cytosol;GO:0005886//plasma membrane;GO:0019898//extrinsic component of membrane	GO:0004379//glycylpeptide N-tetradecanoyltransferase activity;GO:0016740//transferase activity;GO:0016746//transferase activity, transferring acyl groups	GO:0006499//N-terminal protein myristoylation;GO:0018008//N-terminal peptidyl-glycine N-myristoylation
novel_circ_012184	ENSBTAG00000021313	ENSBTAG00000008571	0.930202	1	3	1	miR-382-x	0.0258621	CUX2	cut like homeobox 2 [Source:VGNC Symbol;Acc:VGNC:27840]	-	-	-	-	GO:0005634//nucleus	GO:0000977//RNA polymerase II regulatory region sequence-specific DNA binding;GO:0000978//RNA polymerase II proximal promoter sequence-specific DNA binding;GO:0000981//DNA-binding transcription factor activity, RNA polymerase II-specific;GO:0001227//DNA-binding transcription repressor activity, RNA polymerase II-specific;GO:0003677//DNA binding;GO:0043565//sequence-specific DNA binding;GO:1990837…	GO:0000122//negative regulation of transcription by RNA polymerase II;GO:0006355//regulation of transcription, DNA-templated;GO:0006357//regulation of transcription by RNA polymerase II;GO:0007614//short-term memory;GO:0010628//positive regulation of gene expression;GO:0045892//negative regulation of transcription, DNA-templated;GO:0050775//positive regulation of dendrite morphogenesis;GO:0050890…
novel_circ_012184	ENSBTAG00000021313	ENSBTAG00000014384	0.974139	1	3	1	miR-382-x	0.0258621	ZDHHC22	zinc finger DHHC-type palmitoyltransferase 22 [Source:VGNC Symbol;Acc:VGNC:37138]	-	-	-	-	GO:0005783//endoplasmic reticulum;GO:0005794//Golgi apparatus;GO:0005886//plasma membrane;GO:0016020//membrane;GO:0016021//integral component of membrane	GO:0016409//palmitoyltransferase activity;GO:0016740//transferase activity;GO:0016746//transferase activity, transferring acyl groups;GO:0019706//protein-cysteine S-palmitoyltransferase activity	GO:0006612//protein targeting to membrane;GO:0018215//protein phosphopantetheinylation;GO:0018230//peptidyl-L-cysteine S-palmitoylation;GO:0018345//protein palmitoylation;GO:0072659//protein localization to plasma membrane
novel_circ_012184	ENSBTAG00000021313	ENSBTAG00000021574	0.91538	1	4	1	miR-382-x	0.0344828	TCF7L2	transcription factor 7 like 2 [Source:VGNC Symbol;Acc:VGNC:55976]	Human Diseases;Human Diseases;Human Diseases;Human Diseases;Environmental Information Processing;Environmental Information Processing;Human Diseases;Human Diseases;Human Diseases;Organismal Systems;Human Diseases;Human Diseases;Human Diseases;Cellular Processes;Human Diseases;Human Diseases;Human Diseases;Human Diseases	Cancers;Infectious diseases;Infectious diseases;Cancers;Signal transduction;Signal transduction;Endocrine and metabolic diseases;Cancers;Cancers;Endocrine system;Cancers;Cancers;Cardiovascular diseases;Cellular community - eukaryotes;Cancers;Cancers;Cancers;Cancers	ko05200//Pathways in cancer;ko05165//Human papillomavirus infection;ko05132//Salmonella infection;ko05225//Hepatocellular carcinoma;ko04310//Wnt signaling pathway;ko04390//Hippo signaling pathway;ko04934//Cushing syndrome;ko05226//Gastric cancer;ko05224//Breast cancer;ko04916//Melanogenesis;ko05215//Prostate cancer;ko05210//Colorectal cancer;ko05412//Arrhythmogenic right ventricular cardiomyopath…	K04491;K04491;K04491;K04491;K04491;K04491;K04491;K04491;K04491;K04491;K04491;K04491;K04491;K04491;K04491;K04491;K04491;K04491	GO:0000785//chromatin;GO:0005634//nucleus;GO:0005654//nucleoplasm;GO:0032993//protein-DNA complex;GO:0070369//beta-catenin-TCF7L2 complex;GO:0071664//catenin-TCF7L2 complex;GO:1990907//beta-catenin-TCF complex	GO:0000976//transcription regulatory region sequence-specific DNA binding;GO:0000978//RNA polymerase II proximal promoter sequence-specific DNA binding;GO:0000981//DNA-binding transcription factor activity, RNA polymerase II-specific;GO:0001103//RNA polymerase II repressing transcription factor binding;GO:0003677//DNA binding;GO:0003700//DNA-binding transcription factor activity;GO:0008013//beta-…	GO:0000122//negative regulation of transcription by RNA polymerase II;GO:0001568//blood vessel development;GO:0006357//regulation of transcription by RNA polymerase II;GO:0007050//cell cycle arrest;GO:0010909//positive regulation of heparan sulfate proteoglycan biosynthetic process;GO:0016055//Wnt signaling pathway;GO:0032024//positive regulation of insulin secretion;GO:0032092//positive regulati…
novel_circ_012332	ENSBTAG00000011505	ENSBTAG00000019091	0.965555	1	2	1	novel-m0094-3p	0.0172414	RNPC3	RNA binding region (RNP1, RRM) containing 3 [Source:NCBI gene (formerly Entrezgene);Acc:768060]	-	-	-	-	GO:0005634//nucleus;GO:0005654//nucleoplasm;GO:0005689//U12-type spliceosomal complex	GO:0003676//nucleic acid binding;GO:0003723//RNA binding;GO:0005515//protein binding	-
novel_circ_012445	ENSBTAG00000032515	ENSBTAG00000017411	0.921806	2	1	1	bta-miR-144	0.0172414	AK5	adenylate kinase 5 [Source:VGNC Symbol;Acc:VGNC:25774]	Metabolism;Metabolism;Metabolism	Global and overview maps;Nucleotide metabolism;Metabolism of cofactors and vitamins	ko01100//Metabolic pathways;ko00230//Purine metabolism;ko00730//Thiamine metabolism	K00939;K00939;K00939	GO:0005737//cytoplasm;GO:0005829//cytosol;GO:0034451//centriolar satellite	GO:0004017//adenylate kinase activity;GO:0004550//nucleoside diphosphate kinase activity;GO:0005524//ATP binding;GO:0016301//kinase activity;GO:0016740//transferase activity;GO:0019205//nucleobase-containing compound kinase activity	GO:0006139//nucleobase-containing compound metabolic process;GO:0006165//nucleoside diphosphate phosphorylation;GO:0009142//nucleoside triphosphate biosynthetic process;GO:0016310//phosphorylation;GO:0046034//ATP metabolic process;GO:0046940//nucleoside monophosphate phosphorylation
novel_circ_012722	ENSBTAG00000020614	ENSBTAG00000006282	0.903334	1	4	1	novel-m0094-3p	0.0344828	POU2AF1	POU class 2 homeobox associating factor 1 [Source:VGNC Symbol;Acc:VGNC:33173]	-	-	-	-	GO:0090575//RNA polymerase II transcription factor complex	GO:0003677//DNA binding;GO:0003713//transcription coactivator activity	GO:0002314//germinal center B cell differentiation;GO:0032755//positive regulation of interleukin-6 production;GO:0045944//positive regulation of transcription by RNA polymerase II;GO:0098586//cellular response to virus
novel_circ_012741	ENSBTAG00000013837	ENSBTAG00000013689	0.937234	2	2	1	bta-miR-455-5p	0.0343328	MCTP2	multiple C2 and transmembrane domain containing 2 [Source:VGNC Symbol;Acc:VGNC:31324]	-	-	-	-	GO:0005654//nucleoplasm;GO:0005829//cytosol;GO:0016020//membrane;GO:0016021//integral component of membrane;GO:0030672//synaptic vesicle membrane	GO:0005509//calcium ion binding	GO:0046928//regulation of neurotransmitter secretion
novel_circ_013060	NA	ENSBTAG00000002997	0.978456	3	4	3	bta-miR-218|miR-218-x|miR-218-z	1.57816e-05	ADAMTSL1	ADAMTS like 1 [Source:VGNC Symbol;Acc:VGNC:58359]	-	-	-	-	GO:0031012//extracellular matrix	GO:0004222//metalloendopeptidase activity	GO:0006508//proteolysis;GO:0030198//extracellular matrix organization
novel_circ_013060	NA	ENSBTAG00000005104	0.90248	3	3	2	bta-miR-218|miR-218-x	0.00134143	MGAT5B	alpha-1,6-mannosylglycoprotein 6-beta-N-acetylglucosaminyltransferase B [Source:VGNC Symbol;Acc:VGNC:55847]	Metabolism;Metabolism;Metabolism	Global and overview maps;Glycan biosynthesis and metabolism;Glycan biosynthesis and metabolism	ko01100//Metabolic pathways;ko00510//N-Glycan biosynthesis;ko00515//Mannose type O-glycan biosyntheis	K09661;K09661;K09661	GO:0000139//Golgi membrane;GO:0005794//Golgi apparatus;GO:0016020//membrane;GO:0016021//integral component of membrane	GO:0016740//transferase activity;GO:0016757//transferase activity, transferring glycosyl groups;GO:0030144//alpha-1,6-mannosylglycoprotein 6-beta-N-acetylglucosaminyltransferase activity;GO:0030145//manganese ion binding	GO:0006486//protein glycosylation;GO:0006487//protein N-linked glycosylation;GO:0018215//protein phosphopantetheinylation;GO:0018242//protein O-linked glycosylation via serine
novel_circ_013060	NA	ENSBTAG00000007703	0.937068	3	4	2	bta-miR-218|miR-218-x	0.00266709	NMT2	N-myristoyltransferase 2 [Source:VGNC Symbol;Acc:VGNC:32138]	-	-	-	-	GO:0005737//cytoplasm;GO:0005794//Golgi apparatus;GO:0005829//cytosol;GO:0005886//plasma membrane;GO:0019898//extrinsic component of membrane	GO:0004379//glycylpeptide N-tetradecanoyltransferase activity;GO:0016740//transferase activity;GO:0016746//transferase activity, transferring acyl groups	GO:0006499//N-terminal protein myristoylation;GO:0018008//N-terminal peptidyl-glycine N-myristoylation
novel_circ_013060	NA	ENSBTAG00000009338	0.930649	3	4	3	bta-miR-218|miR-218-x|miR-218-z	1.57816e-05	LRRC7	leucine rich repeat containing 7 [Source:VGNC Symbol;Acc:VGNC:55251]	-	-	-	-	-	GO:0005515//protein binding	-
novel_circ_013060	NA	ENSBTAG00000013499	0.937695	3	4	3	bta-miR-218|miR-218-x|miR-218-z	1.57816e-05	LHX9	LIM homeobox 9 [Source:VGNC Symbol;Acc:VGNC:30878]	-	-	-	-	GO:0005634//nucleus	GO:0000981//DNA-binding transcription factor activity, RNA polymerase II-specific;GO:0003677//DNA binding;GO:0046872//metal ion binding;GO:1990837//sequence-specific double-stranded DNA binding	GO:0006355//regulation of transcription, DNA-templated;GO:0006357//regulation of transcription by RNA polymerase II;GO:0008283//cell proliferation;GO:0008584//male gonad development;GO:0008585//female gonad development;GO:0035262//gonad morphogenesis
novel_circ_013060	NA	ENSBTAG00000014194	0.956431	3	11	3	bta-miR-218|miR-218-x|miR-218-z	0.00065099	ADARB2	adenosine deaminase RNA specific B2 (inactive) [Source:NCBI gene (formerly Entrezgene);Acc:524061]	-	-	-	-	GO:0005730//nucleolus;GO:0005737//cytoplasm	GO:0003723//RNA binding;GO:0003725//double-stranded RNA binding;GO:0003726//double-stranded RNA adenosine deaminase activity;GO:0004000//adenosine deaminase activity;GO:0008251//tRNA-specific adenosine deaminase activity	GO:0006382//adenosine to inosine editing;GO:0006396//RNA processing
novel_circ_013060	NA	ENSBTAG00000017420	0.97303	3	3	3	bta-miR-218|miR-218-x|miR-218-z	3.9454e-06	ZMAT4	zinc finger matrin-type 4 [Source:VGNC Symbol;Acc:VGNC:37193]	-	-	-	-	-	GO:0003676//nucleic acid binding;GO:0008270//zinc ion binding	-
novel_circ_013060	NA	ENSBTAG00000019625	0.982234	3	9	3	bta-miR-218|miR-218-x|miR-218-z	0.000331413	EHHADH	enoyl-CoA hydratase and 3-hydroxyacyl CoA dehydrogenase [Source:VGNC Symbol;Acc:VGNC:53541]	Metabolism;Metabolism;Cellular Processes;Organismal Systems;Metabolism;Metabolism;Metabolism;Metabolism;Metabolism;Metabolism;Metabolism;Metabolism	Global and overview maps;Global and overview maps;Transport and catabolism;Endocrine system;Amino acid metabolism;Global and overview maps;Amino acid metabolism;Amino acid metabolism;Lipid metabolism;Metabolism of other amino acids;Carbohydrate metabolism;Carbohydrate metabolism	ko01100//Metabolic pathways;ko01200//Carbon metabolism;ko04146//Peroxisome;ko03320//PPAR signaling pathway;ko00310//Lysine degradation;ko01212//Fatty acid metabolism;ko00280//Valine, leucine and isoleucine degradation;ko00380//Tryptophan metabolism;ko00071//Fatty acid degradation;ko00410//beta-Alanine metabolism;ko00640//Propanoate metabolism;ko00650//Butanoate metabolism	K07514;K07514;K07514;K07514;K07514;K07514;K07514;K07514;K07514;K07514;K07514;K07514	GO:0005777//peroxisome	GO:0003824//catalytic activity;GO:0003857//3-hydroxyacyl-CoA dehydrogenase activity;GO:0004300//enoyl-CoA hydratase activity;GO:0016491//oxidoreductase activity;GO:0016509//long-chain-3-hydroxyacyl-CoA dehydrogenase activity;GO:0016616//oxidoreductase activity, acting on the CH-OH group of donors, NAD or NADP as acceptor;GO:0019899//enzyme binding;GO:0070403//NAD+ binding	GO:0006629//lipid metabolic process;GO:0006631//fatty acid metabolic process;GO:0006635//fatty acid beta-oxidation;GO:0055114//oxidation-reduction process
novel_circ_013060	NA	ENSBTAG00000038700	0.917428	3	3	2	bta-miR-218|miR-218-x	0.00134143	FAM124B	family with sequence similarity 124 member B [Source:VGNC Symbol;Acc:VGNC:56107]	-	-	-	-	GO:0005654//nucleoplasm;GO:0005739//mitochondrion	-	-
novel_circ_013060	NA	ENSBTAG00000049058	0.940668	3	8	2	bta-miR-218|miR-218-x	0.0121518	INHBB	inhibin subunit beta B [Source:VGNC Symbol;Acc:VGNC:30201]	Environmental Information Processing;Cellular Processes;Environmental Information Processing	Signaling molecules and interaction;Cellular community - eukaryotes;Signal transduction	ko04060//Cytokine-cytokine receptor interaction;ko04550//Signaling pathways regulating pluripotency of stem cells;ko04350//TGF-beta signaling pathway	K22687;K22687;K22687	GO:0005576//extracellular region;GO:0005615//extracellular space;GO:0048471//perinuclear region of cytoplasm;GO:0071944//cell periphery	GO:0005125//cytokine activity;GO:0005179//hormone activity;GO:0008083//growth factor activity;GO:0042803//protein homodimerization activity	GO:0009267//cellular response to starvation;GO:0009611//response to wounding;GO:0010862//positive regulation of pathway-restricted SMAD protein phosphorylation;GO:0032686//negative regulation of hepatocyte growth factor production;GO:0032869//cellular response to insulin stimulus;GO:0032924//activin receptor signaling pathway;GO:0044320//cellular response to leptin stimulus;GO:0045444//fat cell d…
novel_circ_013179	ENSBTAG00000002181	ENSBTAG00000002390	0.912689	1	1	1	miR-10926-z	0.00862069	CCDC184	coiled-coil domain containing 184 [Source:VGNC Symbol;Acc:VGNC:26879]	-	-	-	-	GO:0005737//cytoplasm	-	-
novel_circ_013179	ENSBTAG00000002181	ENSBTAG00000021727	0.942991	1	2	1	miR-10926-z	0.0172414	NTSR1	neurotensin receptor 1 [Source:VGNC Symbol;Acc:VGNC:32312]	Environmental Information Processing;Environmental Information Processing	Signaling molecules and interaction;Signal transduction	ko04080//Neuroactive ligand-receptor interaction;ko04020//Calcium signaling pathway	K04211;K04211	GO:0005886//plasma membrane;GO:0005887//integral component of plasma membrane;GO:0016020//membrane;GO:0016021//integral component of membrane;GO:0045121//membrane raft	GO:0004930//G protein-coupled receptor activity;GO:0016492//G protein-coupled neurotensin receptor activity;GO:0042802//identical protein binding	GO:0007165//signal transduction;GO:0007186//G protein-coupled receptor signaling pathway;GO:0007218//neuropeptide signaling pathway;GO:0008344//adult locomotory behavior;GO:0043066//negative regulation of apoptotic process
novel_circ_013179	ENSBTAG00000002181	ENSBTAG00000055197	0.917486	1	3	1	miR-10926-z	0.0258621	-	AAI42394.1 LOC404176 protein [Bos taurus]	-	-	-	-	GO:0009897//external side of plasma membrane;GO:0042571//immunoglobulin complex, circulating	GO:0003823//antigen binding;GO:0034987//immunoglobulin receptor binding	GO:0006910//phagocytosis, recognition;GO:0006911//phagocytosis, engulfment;GO:0006958//complement activation, classical pathway;GO:0042742//defense response to bacterium;GO:0045087//innate immune response;GO:0050853//B cell receptor signaling pathway;GO:0050871//positive regulation of B cell activation
novel_circ_013227	ENSBTAG00000001712	ENSBTAG00000014968	0.908196	3	1	1	miR-34-x	0.0258621	YJEFN3	YjeF N-terminal domain containing 3 [Source:VGNC Symbol;Acc:VGNC:97329]	-	-	-	-	GO:0005739//mitochondrion	GO:0052856//NADHX epimerase activity;GO:0052857//NADPHX epimerase activity	-
novel_circ_013227	ENSBTAG00000001712	ENSBTAG00000033983	0.930903	3	1	1	miR-34-x	0.0258621	MAP2K1	mitogen-activated protein kinase kinase 1 [Source:VGNC Symbol;Acc:VGNC:31183]	Human Diseases;Environmental Information Processing;Human Diseases;Human Diseases;Environmental Information Processing;Human Diseases;Environmental Information Processing;Human Diseases;Environmental Information Processing;Human Diseases;Human Diseases;Human Diseases;Environmental Information Processing;Cellular Processes;Human Diseases;Human Diseases;Cellular Processes;Organismal Systems;Cellula…	Cancers;Signal transduction;Neurodegenerative diseases;Infectious diseases;Signal transduction;Infectious diseases;Signal transduction;Infectious disease: viral;Signal transduction;Infectious diseases;Infectious diseases;Substance dependence;Signal transduction;Cell motility;Cancers;Infectious diseases;Cellular community - eukaryotes;Immune system;Cell growth and death;Infectious disease: bacteri…	ko05200//Pathways in cancer;ko04151//PI3K-Akt signaling pathway;ko05010//Alzheimer disease;ko05165//Human papillomavirus infection;ko04014//Ras signaling pathway;ko05166//HTLV-I infection;ko04010//MAPK signaling pathway;ko05170//Human immunodeficiency virus 1 infection;ko04015//Rap1 signaling pathway;ko05132//Salmonella infection;ko05163//Human cytomegalovirus infection;ko05034//Alcoholism;ko0402…	K04368;K04368;K04368;K04368;K04368;K04368;K04368;K04368;K04368;K04368;K04368;K04368;K04368;K04368;K04368;K04368;K04368;K04368;K04368;K04368;K04368;K04368;K04368;K04368;K04368;K04368;K04368;K04368;K04368;K04368;K04368;K04368;K04368;K04368;K04368;K04368;K04368;K04368;K04368;K04368;K04368;K04368;K04368;K04368;K04368;K04368;K04368;K04368;K04368;K04368;K04368;K04368;K04368;K04368;K04368;K04368;K04368;…	GO:0005783//endoplasmic reticulum;GO:0005829//cytosol;GO:0005886//plasma membrane	GO:0000166//nucleotide binding;GO:0004672//protein kinase activity;GO:0004674//protein serine/threonine kinase activity;GO:0004708//MAP kinase kinase activity;GO:0005078//MAP-kinase scaffold activity;GO:0005524//ATP binding;GO:0008022//protein C-terminus binding;GO:0043539//protein serine/threonine kinase activator activity;GO:0047485//protein N-terminus binding;GO:0097110//scaffold protein bindi…	GO:0000187//activation of MAPK activity;GO:0006468//protein phosphorylation;GO:0007050//cell cycle arrest;GO:0007507//heart development;GO:0008285//negative regulation of cell proliferation;GO:0010628//positive regulation of gene expression;GO:0010629//negative regulation of gene expression;GO:0018107//peptidyl-threonine phosphorylation;GO:0021697//cerebellar cortex formation;GO:0030182//neuron d…
novel_circ_013227	ENSBTAG00000001712	ENSBTAG00000051421	0.928946	3	1	1	bta-miR-33a	0.0258621	PCP4	Purkinje cell protein 4 [Source:NCBI gene (formerly Entrezgene);Acc:768324]	-	-	-	-	GO:0032991//protein-containing complex	GO:0005509//calcium ion binding;GO:0005516//calmodulin binding	GO:0045666//positive regulation of neuron differentiation;GO:0099004//calmodulin dependent kinase signaling pathway
novel_circ_013241	ENSBTAG00000010978	ENSBTAG00000001082	0.93743	6	3	2	bta-miR-2285ag-3p|miR-34-x	0.00658881	SH2D5	SH2 domain containing 5 [Source:VGNC Symbol;Acc:VGNC:50133]	-	-	-	-	GO:0014069//postsynaptic density	-	-
novel_circ_013241	ENSBTAG00000010978	ENSBTAG00000021574	0.929867	6	4	2	bta-miR-135b|miR-382-x	0.0128683	TCF7L2	transcription factor 7 like 2 [Source:VGNC Symbol;Acc:VGNC:55976]	Human Diseases;Human Diseases;Human Diseases;Human Diseases;Environmental Information Processing;Environmental Information Processing;Human Diseases;Human Diseases;Human Diseases;Organismal Systems;Human Diseases;Human Diseases;Human Diseases;Cellular Processes;Human Diseases;Human Diseases;Human Diseases;Human Diseases	Cancers;Infectious diseases;Infectious diseases;Cancers;Signal transduction;Signal transduction;Endocrine and metabolic diseases;Cancers;Cancers;Endocrine system;Cancers;Cancers;Cardiovascular diseases;Cellular community - eukaryotes;Cancers;Cancers;Cancers;Cancers	ko05200//Pathways in cancer;ko05165//Human papillomavirus infection;ko05132//Salmonella infection;ko05225//Hepatocellular carcinoma;ko04310//Wnt signaling pathway;ko04390//Hippo signaling pathway;ko04934//Cushing syndrome;ko05226//Gastric cancer;ko05224//Breast cancer;ko04916//Melanogenesis;ko05215//Prostate cancer;ko05210//Colorectal cancer;ko05412//Arrhythmogenic right ventricular cardiomyopath…	K04491;K04491;K04491;K04491;K04491;K04491;K04491;K04491;K04491;K04491;K04491;K04491;K04491;K04491;K04491;K04491;K04491;K04491	GO:0000785//chromatin;GO:0005634//nucleus;GO:0005654//nucleoplasm;GO:0032993//protein-DNA complex;GO:0070369//beta-catenin-TCF7L2 complex;GO:0071664//catenin-TCF7L2 complex;GO:1990907//beta-catenin-TCF complex	GO:0000976//transcription regulatory region sequence-specific DNA binding;GO:0000978//RNA polymerase II proximal promoter sequence-specific DNA binding;GO:0000981//DNA-binding transcription factor activity, RNA polymerase II-specific;GO:0001103//RNA polymerase II repressing transcription factor binding;GO:0003677//DNA binding;GO:0003700//DNA-binding transcription factor activity;GO:0008013//beta-…	GO:0000122//negative regulation of transcription by RNA polymerase II;GO:0001568//blood vessel development;GO:0006357//regulation of transcription by RNA polymerase II;GO:0007050//cell cycle arrest;GO:0010909//positive regulation of heparan sulfate proteoglycan biosynthetic process;GO:0016055//Wnt signaling pathway;GO:0032024//positive regulation of insulin secretion;GO:0032092//positive regulati…
novel_circ_013378	ENSBTAG00000010505	ENSBTAG00000000257	0.970194	1	2	1	miR-34-x	0.0172414	MRAP2	melanocortin 2 receptor accessory protein 2 [Source:VGNC Symbol;Acc:VGNC:31596]	-	-	-	-	GO:0005783//endoplasmic reticulum;GO:0005789//endoplasmic reticulum membrane;GO:0005886//plasma membrane;GO:0016020//membrane;GO:0016021//integral component of membrane	GO:0030545//receptor regulator activity;GO:0031780//corticotropin hormone receptor binding;GO:0031781//type 3 melanocortin receptor binding;GO:0031782//type 4 melanocortin receptor binding;GO:0031783//type 5 melanocortin receptor binding;GO:0042802//identical protein binding;GO:0070996//type 1 melanocortin receptor binding	GO:0006112//energy reserve metabolic process;GO:0007631//feeding behavior;GO:0072659//protein localization to plasma membrane;GO:0097009//energy homeostasis;GO:0106070//regulation of adenylate cyclase-activating G protein-coupled receptor signaling pathway;GO:0106071//positive regulation of adenylate cyclase-activating G protein-coupled receptor signaling pathway;GO:0106072//negative regulation o…
novel_circ_013378	ENSBTAG00000010505	ENSBTAG00000001082	0.945741	1	3	1	miR-34-x	0.0258621	SH2D5	SH2 domain containing 5 [Source:VGNC Symbol;Acc:VGNC:50133]	-	-	-	-	GO:0014069//postsynaptic density	-	-
novel_circ_013378	ENSBTAG00000010505	ENSBTAG00000007514	0.953969	1	3	1	miR-34-x	0.0258621	CPNE5	copine 5 [Source:VGNC Symbol;Acc:VGNC:27661]	-	-	-	-	GO:0005886//plasma membrane;GO:0043005//neuron projection;GO:0043025//neuronal cell body	GO:0005544//calcium-dependent phospholipid binding	GO:0071277//cellular response to calcium ion;GO:1903861//positive regulation of dendrite extension
novel_circ_013378	ENSBTAG00000010505	ENSBTAG00000012630	0.952772	1	2	1	miR-34-x	0.0172414	PAMR1	peptidase domain containing associated with muscle reration 1 [Source:VGNC Symbol;Acc:VGNC:32562]	-	-	-	-	-	GO:0004252//serine-type endopeptidase activity;GO:0005509//calcium ion binding	GO:0006508//proteolysis
novel_circ_013378	ENSBTAG00000010505	ENSBTAG00000016455	0.924576	1	5	1	miR-34-x	0.0431035	CACHD1	cache domain containing 1 [Source:VGNC Symbol;Acc:VGNC:26671]	-	-	-	-	GO:0005891//voltage-gated calcium channel complex;GO:0016020//membrane;GO:0016021//integral component of membrane	GO:0005245//voltage-gated calcium channel activity	GO:0006811//ion transport;GO:0006816//calcium ion transport;GO:0070588//calcium ion transmembrane transport
novel_circ_013378	ENSBTAG00000010505	ENSBTAG00000020318	0.915301	1	5	1	miR-34-x	0.0431035	DBNDD1	dysbindin domain containing 1 [Source:VGNC Symbol;Acc:VGNC:27891]	-	-	-	-	GO:0005737//cytoplasm	-	-
novel_circ_013378	ENSBTAG00000010505	ENSBTAG00000033983	0.91195	1	1	1	miR-34-x	0.00862069	MAP2K1	mitogen-activated protein kinase kinase 1 [Source:VGNC Symbol;Acc:VGNC:31183]	Human Diseases;Environmental Information Processing;Human Diseases;Human Diseases;Environmental Information Processing;Human Diseases;Environmental Information Processing;Human Diseases;Environmental Information Processing;Human Diseases;Human Diseases;Human Diseases;Environmental Information Processing;Cellular Processes;Human Diseases;Human Diseases;Cellular Processes;Organismal Systems;Cellula…	Cancers;Signal transduction;Neurodegenerative diseases;Infectious diseases;Signal transduction;Infectious diseases;Signal transduction;Infectious disease: viral;Signal transduction;Infectious diseases;Infectious diseases;Substance dependence;Signal transduction;Cell motility;Cancers;Infectious diseases;Cellular community - eukaryotes;Immune system;Cell growth and death;Infectious disease: bacteri…	ko05200//Pathways in cancer;ko04151//PI3K-Akt signaling pathway;ko05010//Alzheimer disease;ko05165//Human papillomavirus infection;ko04014//Ras signaling pathway;ko05166//HTLV-I infection;ko04010//MAPK signaling pathway;ko05170//Human immunodeficiency virus 1 infection;ko04015//Rap1 signaling pathway;ko05132//Salmonella infection;ko05163//Human cytomegalovirus infection;ko05034//Alcoholism;ko0402…	K04368;K04368;K04368;K04368;K04368;K04368;K04368;K04368;K04368;K04368;K04368;K04368;K04368;K04368;K04368;K04368;K04368;K04368;K04368;K04368;K04368;K04368;K04368;K04368;K04368;K04368;K04368;K04368;K04368;K04368;K04368;K04368;K04368;K04368;K04368;K04368;K04368;K04368;K04368;K04368;K04368;K04368;K04368;K04368;K04368;K04368;K04368;K04368;K04368;K04368;K04368;K04368;K04368;K04368;K04368;K04368;K04368;…	GO:0005783//endoplasmic reticulum;GO:0005829//cytosol;GO:0005886//plasma membrane	GO:0000166//nucleotide binding;GO:0004672//protein kinase activity;GO:0004674//protein serine/threonine kinase activity;GO:0004708//MAP kinase kinase activity;GO:0005078//MAP-kinase scaffold activity;GO:0005524//ATP binding;GO:0008022//protein C-terminus binding;GO:0043539//protein serine/threonine kinase activator activity;GO:0047485//protein N-terminus binding;GO:0097110//scaffold protein bindi…	GO:0000187//activation of MAPK activity;GO:0006468//protein phosphorylation;GO:0007050//cell cycle arrest;GO:0007507//heart development;GO:0008285//negative regulation of cell proliferation;GO:0010628//positive regulation of gene expression;GO:0010629//negative regulation of gene expression;GO:0018107//peptidyl-threonine phosphorylation;GO:0021697//cerebellar cortex formation;GO:0030182//neuron d…
novel_circ_013468	ENSBTAG00000010178	ENSBTAG00000001576	0.970502	3	1	1	bta-miR-135b	0.0258621	TMEM140	transmembrane protein 140 [Source:VGNC Symbol;Acc:VGNC:35973]	-	-	-	-	GO:0016020//membrane;GO:0016021//integral component of membrane	-	-
novel_circ_013468	ENSBTAG00000010178	ENSBTAG00000003776	0.93892	3	1	1	miR-382-x	0.0258621	MSANTD1	Myb/SANT DNA binding domain containing 1 [Source:VGNC Symbol;Acc:VGNC:31688]	-	-	-	-	GO:0016604//nuclear body	-	GO:0045893//positive regulation of transcription, DNA-templated
novel_circ_013468	ENSBTAG00000010178	ENSBTAG00000021574	0.926357	3	4	2	bta-miR-135b|miR-382-x	0.00266709	TCF7L2	transcription factor 7 like 2 [Source:VGNC Symbol;Acc:VGNC:55976]	Human Diseases;Human Diseases;Human Diseases;Human Diseases;Environmental Information Processing;Environmental Information Processing;Human Diseases;Human Diseases;Human Diseases;Organismal Systems;Human Diseases;Human Diseases;Human Diseases;Cellular Processes;Human Diseases;Human Diseases;Human Diseases;Human Diseases	Cancers;Infectious diseases;Infectious diseases;Cancers;Signal transduction;Signal transduction;Endocrine and metabolic diseases;Cancers;Cancers;Endocrine system;Cancers;Cancers;Cardiovascular diseases;Cellular community - eukaryotes;Cancers;Cancers;Cancers;Cancers	ko05200//Pathways in cancer;ko05165//Human papillomavirus infection;ko05132//Salmonella infection;ko05225//Hepatocellular carcinoma;ko04310//Wnt signaling pathway;ko04390//Hippo signaling pathway;ko04934//Cushing syndrome;ko05226//Gastric cancer;ko05224//Breast cancer;ko04916//Melanogenesis;ko05215//Prostate cancer;ko05210//Colorectal cancer;ko05412//Arrhythmogenic right ventricular cardiomyopath…	K04491;K04491;K04491;K04491;K04491;K04491;K04491;K04491;K04491;K04491;K04491;K04491;K04491;K04491;K04491;K04491;K04491;K04491	GO:0000785//chromatin;GO:0005634//nucleus;GO:0005654//nucleoplasm;GO:0032993//protein-DNA complex;GO:0070369//beta-catenin-TCF7L2 complex;GO:0071664//catenin-TCF7L2 complex;GO:1990907//beta-catenin-TCF complex	GO:0000976//transcription regulatory region sequence-specific DNA binding;GO:0000978//RNA polymerase II proximal promoter sequence-specific DNA binding;GO:0000981//DNA-binding transcription factor activity, RNA polymerase II-specific;GO:0001103//RNA polymerase II repressing transcription factor binding;GO:0003677//DNA binding;GO:0003700//DNA-binding transcription factor activity;GO:0008013//beta-…	GO:0000122//negative regulation of transcription by RNA polymerase II;GO:0001568//blood vessel development;GO:0006357//regulation of transcription by RNA polymerase II;GO:0007050//cell cycle arrest;GO:0010909//positive regulation of heparan sulfate proteoglycan biosynthetic process;GO:0016055//Wnt signaling pathway;GO:0032024//positive regulation of insulin secretion;GO:0032092//positive regulati…
novel_circ_013523	ENSBTAG00000010978	ENSBTAG00000012194	0.91568	2	2	1	bta-miR-2285ag-3p	0.0343328	DENND2C	DENN domain containing 2C [Source:VGNC Symbol;Acc:VGNC:27996]	-	-	-	-	GO:0005654//nucleoplasm	GO:0005085//guanyl-nucleotide exchange factor activity	GO:0050790//regulation of catalytic activity
novel_circ_013523	ENSBTAG00000010978	ENSBTAG00000014981	0.902924	2	2	1	miR-34-x	0.0343328	OTUB2	OTU deubiquitinase, ubiquitin aldehyde binding 2 [Source:VGNC Symbol;Acc:VGNC:32492]	-	-	-	-	-	GO:0004843//thiol-dependent ubiquitin-specific protease activity;GO:0016787//hydrolase activity	GO:0016579//protein deubiquitination;GO:0035871//protein K11-linked deubiquitination;GO:0070536//protein K63-linked deubiquitination;GO:0071108//protein K48-linked deubiquitination
novel_circ_013624	ENSBTAG00000032637	ENSBTAG00000000257	0.932329	2	2	1	miR-34-x	0.0343328	MRAP2	melanocortin 2 receptor accessory protein 2 [Source:VGNC Symbol;Acc:VGNC:31596]	-	-	-	-	GO:0005783//endoplasmic reticulum;GO:0005789//endoplasmic reticulum membrane;GO:0005886//plasma membrane;GO:0016020//membrane;GO:0016021//integral component of membrane	GO:0030545//receptor regulator activity;GO:0031780//corticotropin hormone receptor binding;GO:0031781//type 3 melanocortin receptor binding;GO:0031782//type 4 melanocortin receptor binding;GO:0031783//type 5 melanocortin receptor binding;GO:0042802//identical protein binding;GO:0070996//type 1 melanocortin receptor binding	GO:0006112//energy reserve metabolic process;GO:0007631//feeding behavior;GO:0072659//protein localization to plasma membrane;GO:0097009//energy homeostasis;GO:0106070//regulation of adenylate cyclase-activating G protein-coupled receptor signaling pathway;GO:0106071//positive regulation of adenylate cyclase-activating G protein-coupled receptor signaling pathway;GO:0106072//negative regulation o…
novel_circ_013666	ENSBTAG00000006107	ENSBTAG00000005917	0.904085	5	8	2	bta-miR-507-3p|miR-200-x	0.0377054	PARD6G	par-6 family cell polarity regulator gamma [Source:VGNC Symbol;Acc:VGNC:32585]	Human Diseases;Environmental Information Processing;Cellular Processes;Cellular Processes;Organismal Systems;Environmental Information Processing	Infectious diseases;Signal transduction;Transport and catabolism;Cellular community - eukaryotes;Development;Signal transduction	ko05165//Human papillomavirus infection;ko04015//Rap1 signaling pathway;ko04144//Endocytosis;ko04530//Tight junction;ko04360//Axon guidance;ko04390//Hippo signaling pathway	K06093;K06093;K06093;K06093;K06093;K06093	GO:0005634//nucleus;GO:0005737//cytoplasm;GO:0005923//bicellular tight junction;GO:0005938//cell cortex;GO:0016020//membrane;GO:0016324//apical plasma membrane	GO:0005080//protein kinase C binding;GO:0005515//protein binding	GO:0007049//cell cycle;GO:0007098//centrosome cycle;GO:0007163//establishment or maintenance of cell polarity;GO:0051301//cell division;GO:0060341//regulation of cellular localization
novel_circ_013666	ENSBTAG00000006107	ENSBTAG00000043948	0.90207	5	1	1	miR-200-x	0.0431035	HCN1	hyperpolarization activated cyclic nucleotide gated potassium channel 1 [Source:VGNC Symbol;Acc:VGNC:29776]	Organismal Systems	Endocrine system	ko04929//GnRH secretion	K04954	GO:0005886//plasma membrane;GO:0005887//integral component of plasma membrane;GO:0016020//membrane;GO:0016021//integral component of membrane;GO:0030424//axon;GO:0030425//dendrite;GO:0098855//HCN channel complex	GO:0005216//ion channel activity;GO:0005222//intracellular cAMP-activated cation channel activity;GO:0005248//voltage-gated sodium channel activity;GO:0005249//voltage-gated potassium channel activity;GO:0005272//sodium channel activity;GO:0022843//voltage-gated cation channel activity;GO:0030552//cAMP binding;GO:0042802//identical protein binding	GO:0006811//ion transport;GO:0006813//potassium ion transport;GO:0006814//sodium ion transport;GO:0035725//sodium ion transmembrane transport;GO:0042391//regulation of membrane potential;GO:0045176//apical protein localization;GO:0046549//retinal cone cell development;GO:0051289//protein homotetramerization;GO:0055085//transmembrane transport;GO:0071320//cellular response to cAMP;GO:0071805//pota…
novel_circ_013676	ENSBTAG00000017545	ENSBTAG00000001576	0.971601	1	1	1	bta-miR-135b	0.00862069	TMEM140	transmembrane protein 140 [Source:VGNC Symbol;Acc:VGNC:35973]	-	-	-	-	GO:0016020//membrane;GO:0016021//integral component of membrane	-	-
novel_circ_013676	ENSBTAG00000017545	ENSBTAG00000013974	0.957285	1	3	1	bta-miR-135b	0.0258621	TMEM215	transmembrane protein 215 [Source:VGNC Symbol;Acc:VGNC:36037]	-	-	-	-	-	-	-
novel_circ_013904	ENSBTAG00000004249	ENSBTAG00000006902	0.905581	17	6	3	bta-miR-455-5p|miR-101-x|miR-211-x	0.040047	KCNJ5	potassium inwardly rectifying channel subfamily J member 5 [Source:VGNC Symbol;Acc:VGNC:30462]	Organismal Systems;Organismal Systems;Organismal Systems;Organismal Systems;Organismal Systems;Organismal Systems;Organismal Systems;Human Diseases;Organismal Systems	Nervous system;Endocrine system;Endocrine system;Nervous system;Nervous system;Environmental adaptation;Endocrine system;Substance dependence;Endocrine system	ko04723//Retrograde endocannabinoid signaling;ko04921//Oxytocin signaling pathway;ko04915//Estrogen signaling pathway;ko04728//Dopaminergic synapse;ko04726//Serotonergic synapse;ko04713//Circadian entrainment;ko04925//Aldosterone synthesis and secretion;ko05032//Morphine addiction;ko04929//GnRH secretion	K04999;K04999;K04999;K04999;K04999;K04999;K04999;K04999;K04999	GO:0008076//voltage-gated potassium channel complex;GO:0016020//membrane;GO:0016021//integral component of membrane	GO:0005242//inward rectifier potassium channel activity;GO:0015467//G-protein activated inward rectifier potassium channel activity;GO:0086089//voltage-gated potassium channel activity involved in atrial cardiac muscle cell action potential repolarization	GO:0006813//potassium ion transport;GO:0086091//regulation of heart rate by cardiac conduction;GO:0098914//membrane repolarization during atrial cardiac muscle cell action potential;GO:1990573//potassium ion import across plasma membrane
novel_circ_013965	ENSBTAG00000005221	ENSBTAG00000007204	0.924266	3	4	2	bta-miR-211|miR-211-x	0.00266709	KRT80	keratin 80 [Source:VGNC Symbol;Acc:VGNC:30742]	-	-	-	-	GO:0005882//intermediate filament;GO:0045095//keratin filament;GO:0045111//intermediate filament cytoskeleton	-	-
novel_circ_013965	ENSBTAG00000005221	ENSBTAG00000010866	0.904519	3	1	1	bta-miR-135b	0.0258621	BMPER	BMP binding endothelial regulator [Source:VGNC Symbol;Acc:VGNC:26523]	-	-	-	-	GO:0005576//extracellular region;GO:0005615//extracellular space;GO:0031012//extracellular matrix	GO:0005515//protein binding	GO:0001568//blood vessel development;GO:0001657//ureteric bud development;GO:0002043//blood vessel endothelial cell proliferation involved in sprouting angiogenesis;GO:0010594//regulation of endothelial cell migration;GO:0030514//negative regulation of BMP signaling pathway;GO:0042118//endothelial cell activation;GO:0045765//regulation of angiogenesis;GO:0048839//inner ear development;GO:0060393/…
novel_circ_013999	ENSBTAG00000010505	ENSBTAG00000026836	0.959401	1	3	1	bta-miR-146b	0.0258621	-	XP_013830320.2 PREDICTED: target of Nesh-SH3 isoform X10 [Capra hircus]	-	-	-	-	-	GO:0005515//protein binding	-
novel_circ_014057	ENSBTAG00000049952	ENSBTAG00000003827	0.938142	14	7	3	bta-miR-135b|bta-miR-211|bta-miR-302a	0.0370884	RIMS2	regulating synaptic membrane exocytosis 2 [Source:VGNC Symbol;Acc:VGNC:33972]	Organismal Systems	Endocrine system	ko04911//Insulin secretion	K15297	GO:0016020//membrane	GO:0031267//small GTPase binding	GO:0006887//exocytosis
novel_circ_014057	ENSBTAG00000049952	ENSBTAG00000005104	0.964513	14	3	2	bta-miR-218|miR-218-x	0.0380573	MGAT5B	alpha-1,6-mannosylglycoprotein 6-beta-N-acetylglucosaminyltransferase B [Source:VGNC Symbol;Acc:VGNC:55847]	Metabolism;Metabolism;Metabolism	Global and overview maps;Glycan biosynthesis and metabolism;Glycan biosynthesis and metabolism	ko01100//Metabolic pathways;ko00510//N-Glycan biosynthesis;ko00515//Mannose type O-glycan biosyntheis	K09661;K09661;K09661	GO:0000139//Golgi membrane;GO:0005794//Golgi apparatus;GO:0016020//membrane;GO:0016021//integral component of membrane	GO:0016740//transferase activity;GO:0016757//transferase activity, transferring glycosyl groups;GO:0030144//alpha-1,6-mannosylglycoprotein 6-beta-N-acetylglucosaminyltransferase activity;GO:0030145//manganese ion binding	GO:0006486//protein glycosylation;GO:0006487//protein N-linked glycosylation;GO:0018215//protein phosphopantetheinylation;GO:0018242//protein O-linked glycosylation via serine
novel_circ_014057	ENSBTAG00000049952	ENSBTAG00000008921	0.957076	14	2	2	bta-miR-135b|miR-3535-z	0.0136432	NEXN	nexilin F-actin binding protein [Source:VGNC Symbol;Acc:VGNC:32025]	-	-	-	-	GO:0005886//plasma membrane;GO:0015629//actin cytoskeleton;GO:0030424//axon	GO:0005515//protein binding;GO:0008307//structural constituent of muscle;GO:0051015//actin filament binding;GO:0098632//cell-cell adhesion mediator activity	GO:0007155//cell adhesion;GO:0007156//homophilic cell adhesion via plasma membrane adhesion molecules;GO:0007411//axon guidance;GO:0030334//regulation of cell migration;GO:0051493//regulation of cytoskeleton organization;GO:0070593//dendrite self-avoidance
novel_circ_014057	ENSBTAG00000049952	ENSBTAG00000009338	0.943424	14	4	3	bta-miR-218|miR-218-x|miR-218-z	0.0053251	LRRC7	leucine rich repeat containing 7 [Source:VGNC Symbol;Acc:VGNC:55251]	-	-	-	-	-	GO:0005515//protein binding	-
novel_circ_014057	ENSBTAG00000049952	ENSBTAG00000014384	0.903597	14	3	2	bta-miR-455-3p|miR-652-x	0.0380573	ZDHHC22	zinc finger DHHC-type palmitoyltransferase 22 [Source:VGNC Symbol;Acc:VGNC:37138]	-	-	-	-	GO:0005783//endoplasmic reticulum;GO:0005794//Golgi apparatus;GO:0005886//plasma membrane;GO:0016020//membrane;GO:0016021//integral component of membrane	GO:0016409//palmitoyltransferase activity;GO:0016740//transferase activity;GO:0016746//transferase activity, transferring acyl groups;GO:0019706//protein-cysteine S-palmitoyltransferase activity	GO:0006612//protein targeting to membrane;GO:0018215//protein phosphopantetheinylation;GO:0018230//peptidyl-L-cysteine S-palmitoylation;GO:0018345//protein palmitoylation;GO:0072659//protein localization to plasma membrane
novel_circ_014057	ENSBTAG00000049952	ENSBTAG00000018841	0.944555	14	2	2	bta-miR-144|miR-652-x	0.0136432	PTPN3	protein tyrosine phosphatase non-receptor type 3 [Source:VGNC Symbol;Acc:VGNC:33538]	-	-	-	-	GO:0005737//cytoplasm;GO:0005856//cytoskeleton;GO:0009898//cytoplasmic side of plasma membrane	GO:0001784//phosphotyrosine residue binding;GO:0004721//phosphoprotein phosphatase activity;GO:0004725//protein tyrosine phosphatase activity;GO:0005515//protein binding;GO:0008092//cytoskeletal protein binding;GO:0016787//hydrolase activity;GO:0016791//phosphatase activity;GO:0017080//sodium channel regulator activity;GO:0051117//ATPase binding	GO:0006470//protein dephosphorylation;GO:0016311//dephosphorylation;GO:0035335//peptidyl-tyrosine dephosphorylation;GO:0045930//negative regulation of mitotic cell cycle;GO:0051045//negative regulation of membrane protein ectodomain proteolysis;GO:0098902//regulation of membrane depolarization during action potential;GO:2000649//regulation of sodium ion transmembrane transporter activity
novel_circ_014057	ENSBTAG00000049952	ENSBTAG00000038700	0.900164	14	3	3	bta-miR-144|bta-miR-218|miR-218-x	0.00143612	FAM124B	family with sequence similarity 124 member B [Source:VGNC Symbol;Acc:VGNC:56107]	-	-	-	-	GO:0005654//nucleoplasm;GO:0005739//mitochondrion	-	-
novel_circ_014057	ENSBTAG00000049952	ENSBTAG00000049058	0.957143	14	8	4	bta-miR-211|bta-miR-218|bta-miR-302b|miR-218-x	0.00726175	INHBB	inhibin subunit beta B [Source:VGNC Symbol;Acc:VGNC:30201]	Environmental Information Processing;Cellular Processes;Environmental Information Processing	Signaling molecules and interaction;Cellular community - eukaryotes;Signal transduction	ko04060//Cytokine-cytokine receptor interaction;ko04550//Signaling pathways regulating pluripotency of stem cells;ko04350//TGF-beta signaling pathway	K22687;K22687;K22687	GO:0005576//extracellular region;GO:0005615//extracellular space;GO:0048471//perinuclear region of cytoplasm;GO:0071944//cell periphery	GO:0005125//cytokine activity;GO:0005179//hormone activity;GO:0008083//growth factor activity;GO:0042803//protein homodimerization activity	GO:0009267//cellular response to starvation;GO:0009611//response to wounding;GO:0010862//positive regulation of pathway-restricted SMAD protein phosphorylation;GO:0032686//negative regulation of hepatocyte growth factor production;GO:0032869//cellular response to insulin stimulus;GO:0032924//activin receptor signaling pathway;GO:0044320//cellular response to leptin stimulus;GO:0045444//fat cell d…
novel_circ_014057	ENSBTAG00000049952	ENSBTAG00000049223	0.917437	14	3	2	bta-miR-144|miR-18-x	0.0380573	SPTSSB	serine palmitoyltransferase small subunit B [Source:NCBI gene (formerly Entrezgene);Acc:780785]	-	-	-	-	GO:0017059//serine C-palmitoyltransferase complex	GO:0004758//serine C-palmitoyltransferase activity	GO:0007029//endoplasmic reticulum organization;GO:0030148//sphingolipid biosynthetic process;GO:0046513//ceramide biosynthetic process;GO:1904220//regulation of serine C-palmitoyltransferase activity
novel_circ_014057	ENSBTAG00000049952	ENSBTAG00000051600	0.953299	14	4	4	bta-miR-218|bta-miR-302a|bta-miR-302b|miR-218-x	0.0001398	-	XP_032263750.1 A-kinase anchoring protein 7 isoform X3 [Phoca vitulina]	-	-	-	-	GO:0005829//cytosol	GO:0034237//protein kinase A regulatory subunit binding	GO:0010738//regulation of protein kinase A signaling
novel_circ_014119	ENSBTAG00000020735	ENSBTAG00000004119	0.9594	1	4	1	bta-miR-412	0.0344828	NEUROD2	neuronal differentiation 2 [Source:VGNC Symbol;Acc:VGNC:32018]	-	-	-	-	GO:0005634//nucleus	GO:0000977//RNA polymerase II regulatory region sequence-specific DNA binding;GO:0000978//RNA polymerase II proximal promoter sequence-specific DNA binding;GO:0000981//DNA-binding transcription factor activity, RNA polymerase II-specific;GO:0001228//DNA-binding transcription activator activity, RNA polymerase II-specific;GO:0003677//DNA binding;GO:0003700//DNA-binding transcription factor activit…	GO:0001662//behavioral fear response;GO:0006355//regulation of transcription, DNA-templated;GO:0006357//regulation of transcription by RNA polymerase II;GO:0007275//multicellular organism development;GO:0007399//nervous system development;GO:0008306//associative learning;GO:0016567//protein ubiquitination;GO:0021695//cerebellar cortex development;GO:0030154//cell differentiation;GO:0030182//neuro…
novel_circ_014120	ENSBTAG00000001223	ENSBTAG00000002997	0.905864	1	4	1	miR-497-y	0.0344828	ADAMTSL1	ADAMTS like 1 [Source:VGNC Symbol;Acc:VGNC:58359]	-	-	-	-	GO:0031012//extracellular matrix	GO:0004222//metalloendopeptidase activity	GO:0006508//proteolysis;GO:0030198//extracellular matrix organization
novel_circ_014120	ENSBTAG00000001223	ENSBTAG00000012976	0.924566	1	1	1	miR-497-y	0.00862069	WLS	Wnt ligand secretion mediator [Source:VGNC Symbol;Acc:VGNC:36948]	-	-	-	-	GO:0000139//Golgi membrane;GO:0005769//early endosome;GO:0005783//endoplasmic reticulum;GO:0005794//Golgi apparatus;GO:0005802//trans-Golgi network;GO:0005829//cytosol;GO:0005886//plasma membrane;GO:0012505//endomembrane system;GO:0016020//membrane;GO:0016021//integral component of membrane;GO:0031301//integral component of organelle membrane;GO:0031410//cytoplasmic vesicle	GO:0017147//Wnt-protein binding	GO:0006886//intracellular protein transport;GO:0007275//multicellular organism development;GO:0016055//Wnt signaling pathway;GO:0030177//positive regulation of Wnt signaling pathway;GO:0061355//Wnt protein secretion;GO:0061357//positive regulation of Wnt protein secretion;GO:0090263//positive regulation of canonical Wnt signaling pathway
novel_circ_014120	ENSBTAG00000001223	ENSBTAG00000016741	0.939839	1	1	1	miR-497-y	0.00862069	TOX2	TOX high mobility group box family member 2 [Source:VGNC Symbol;Acc:VGNC:55084]	-	-	-	-	GO:0005634//nucleus;GO:0005654//nucleoplasm	GO:0003677//DNA binding;GO:0003713//transcription coactivator activity;GO:0031490//chromatin DNA binding	GO:0006357//regulation of transcription by RNA polymerase II;GO:0045944//positive regulation of transcription by RNA polymerase II
novel_circ_014120	ENSBTAG00000001223	ENSBTAG00000017198	0.941693	1	4	1	miR-497-y	0.0344828	CHRNA4	cholinergic receptor nicotinic alpha 4 subunit [Source:VGNC Symbol;Acc:VGNC:27326]	Environmental Information Processing;Organismal Systems;Human Diseases	Signaling molecules and interaction;Nervous system;Substance dependence	ko04080//Neuroactive ligand-receptor interaction;ko04725//Cholinergic synapse;ko05033//Nicotine addiction	K04806;K04806;K04806	GO:0005886//plasma membrane;GO:0005887//integral component of plasma membrane;GO:0005892//acetylcholine-gated channel complex;GO:0016020//membrane;GO:0016021//integral component of membrane;GO:0030054//cell junction;GO:0043005//neuron projection;GO:0045202//synapse;GO:0045211//postsynaptic membrane	GO:0004888//transmembrane signaling receptor activity;GO:0005216//ion channel activity;GO:0005230//extracellular ligand-gated ion channel activity;GO:0015464//acetylcholine receptor activity;GO:0022848//acetylcholine-gated cation-selective channel activity;GO:0030594//neurotransmitter receptor activity	GO:0001666//response to hypoxia;GO:0006281//DNA repair;GO:0006811//ion transport;GO:0006979//response to oxidative stress;GO:0007165//signal transduction;GO:0007268//chemical synaptic transmission;GO:0007271//synaptic transmission, cholinergic;GO:0034220//ion transmembrane transport;GO:0035094//response to nicotine;GO:0035095//behavioral response to nicotine;GO:0042391//regulation of membrane pot…
novel_circ_014188	ENSBTAG00000009584	ENSBTAG00000003749	0.955289	9	2	2	bta-miR-218|miR-218-x	0.0053973	KCNMB4	potassium calcium-activated channel subfamily M regulatory beta subunit 4 [Source:VGNC Symbol;Acc:VGNC:30482]	Environmental Information Processing;Organismal Systems;Organismal Systems	Signal transduction;Circulatory system;Endocrine system	ko04022//cGMP - PKG signaling pathway;ko04270//Vascular smooth muscle contraction;ko04911//Insulin secretion	K04941;K04941;K04941	GO:0005887//integral component of plasma membrane;GO:0008076//voltage-gated potassium channel complex;GO:0016020//membrane;GO:0016021//integral component of membrane	GO:0015269//calcium-activated potassium channel activity;GO:0015459//potassium channel regulator activity	GO:0001508//action potential;GO:0005513//detection of calcium ion;GO:0006813//potassium ion transport;GO:0019228//neuronal action potential;GO:0071805//potassium ion transmembrane transport
novel_circ_014188	ENSBTAG00000009584	ENSBTAG00000007703	0.916232	9	4	3	bta-miR-218|miR-218-x|miR-382-x	0.00127286	NMT2	N-myristoyltransferase 2 [Source:VGNC Symbol;Acc:VGNC:32138]	-	-	-	-	GO:0005737//cytoplasm;GO:0005794//Golgi apparatus;GO:0005829//cytosol;GO:0005886//plasma membrane;GO:0019898//extrinsic component of membrane	GO:0004379//glycylpeptide N-tetradecanoyltransferase activity;GO:0016740//transferase activity;GO:0016746//transferase activity, transferring acyl groups	GO:0006499//N-terminal protein myristoylation;GO:0018008//N-terminal peptidyl-glycine N-myristoylation
novel_circ_014188	ENSBTAG00000009584	ENSBTAG00000012604	0.953047	9	2	2	miR-1296-x|miR-218-x	0.0053973	NCMAP	non-compact myelin associated protein [Source:VGNC Symbol;Acc:VGNC:31920]	-	-	-	-	GO:0005887//integral component of plasma membrane;GO:0016020//membrane;GO:0016021//integral component of membrane;GO:0033270//paranode region of axon;GO:0043220//Schmidt-Lanterman incisure	GO:0019911//structural constituent of myelin sheath	GO:0031641//regulation of myelination;GO:0032290//peripheral nervous system myelin formation
novel_circ_014188	ENSBTAG00000009584	ENSBTAG00000014194	0.905079	9	11	5	bta-miR-218|miR-10926-z|miR-218-x|miR-382-x|miR-9995-y	0.000301287	ADARB2	adenosine deaminase RNA specific B2 (inactive) [Source:NCBI gene (formerly Entrezgene);Acc:524061]	-	-	-	-	GO:0005730//nucleolus;GO:0005737//cytoplasm	GO:0003723//RNA binding;GO:0003725//double-stranded RNA binding;GO:0003726//double-stranded RNA adenosine deaminase activity;GO:0004000//adenosine deaminase activity;GO:0008251//tRNA-specific adenosine deaminase activity	GO:0006382//adenosine to inosine editing;GO:0006396//RNA processing
novel_circ_014188	ENSBTAG00000009584	ENSBTAG00000019625	0.901541	9	9	3	bta-miR-144|bta-miR-218|miR-218-x	0.0217575	EHHADH	enoyl-CoA hydratase and 3-hydroxyacyl CoA dehydrogenase [Source:VGNC Symbol;Acc:VGNC:53541]	Metabolism;Metabolism;Cellular Processes;Organismal Systems;Metabolism;Metabolism;Metabolism;Metabolism;Metabolism;Metabolism;Metabolism;Metabolism	Global and overview maps;Global and overview maps;Transport and catabolism;Endocrine system;Amino acid metabolism;Global and overview maps;Amino acid metabolism;Amino acid metabolism;Lipid metabolism;Metabolism of other amino acids;Carbohydrate metabolism;Carbohydrate metabolism	ko01100//Metabolic pathways;ko01200//Carbon metabolism;ko04146//Peroxisome;ko03320//PPAR signaling pathway;ko00310//Lysine degradation;ko01212//Fatty acid metabolism;ko00280//Valine, leucine and isoleucine degradation;ko00380//Tryptophan metabolism;ko00071//Fatty acid degradation;ko00410//beta-Alanine metabolism;ko00640//Propanoate metabolism;ko00650//Butanoate metabolism	K07514;K07514;K07514;K07514;K07514;K07514;K07514;K07514;K07514;K07514;K07514;K07514	GO:0005777//peroxisome	GO:0003824//catalytic activity;GO:0003857//3-hydroxyacyl-CoA dehydrogenase activity;GO:0004300//enoyl-CoA hydratase activity;GO:0016491//oxidoreductase activity;GO:0016509//long-chain-3-hydroxyacyl-CoA dehydrogenase activity;GO:0016616//oxidoreductase activity, acting on the CH-OH group of donors, NAD or NADP as acceptor;GO:0019899//enzyme binding;GO:0070403//NAD+ binding	GO:0006629//lipid metabolic process;GO:0006631//fatty acid metabolic process;GO:0006635//fatty acid beta-oxidation;GO:0055114//oxidation-reduction process
novel_circ_014278	ENSBTAG00000016533	ENSBTAG00000000257	0.917848	1	2	1	miR-211-x	0.0172414	MRAP2	melanocortin 2 receptor accessory protein 2 [Source:VGNC Symbol;Acc:VGNC:31596]	-	-	-	-	GO:0005783//endoplasmic reticulum;GO:0005789//endoplasmic reticulum membrane;GO:0005886//plasma membrane;GO:0016020//membrane;GO:0016021//integral component of membrane	GO:0030545//receptor regulator activity;GO:0031780//corticotropin hormone receptor binding;GO:0031781//type 3 melanocortin receptor binding;GO:0031782//type 4 melanocortin receptor binding;GO:0031783//type 5 melanocortin receptor binding;GO:0042802//identical protein binding;GO:0070996//type 1 melanocortin receptor binding	GO:0006112//energy reserve metabolic process;GO:0007631//feeding behavior;GO:0072659//protein localization to plasma membrane;GO:0097009//energy homeostasis;GO:0106070//regulation of adenylate cyclase-activating G protein-coupled receptor signaling pathway;GO:0106071//positive regulation of adenylate cyclase-activating G protein-coupled receptor signaling pathway;GO:0106072//negative regulation o…
novel_circ_014278	ENSBTAG00000016533	ENSBTAG00000007204	0.915194	1	4	1	miR-211-x	0.0344828	KRT80	keratin 80 [Source:VGNC Symbol;Acc:VGNC:30742]	-	-	-	-	GO:0005882//intermediate filament;GO:0045095//keratin filament;GO:0045111//intermediate filament cytoskeleton	-	-
novel_circ_014278	ENSBTAG00000016533	ENSBTAG00000016455	0.935629	1	5	1	miR-211-x	0.0431035	CACHD1	cache domain containing 1 [Source:VGNC Symbol;Acc:VGNC:26671]	-	-	-	-	GO:0005891//voltage-gated calcium channel complex;GO:0016020//membrane;GO:0016021//integral component of membrane	GO:0005245//voltage-gated calcium channel activity	GO:0006811//ion transport;GO:0006816//calcium ion transport;GO:0070588//calcium ion transmembrane transport
novel_circ_014278	ENSBTAG00000016533	ENSBTAG00000017549	0.901726	1	2	1	miR-211-x	0.0172414	KITLG	KIT ligand [Source:VGNC Symbol;Acc:VGNC:30619]	Human Diseases;Environmental Information Processing;Environmental Information Processing;Environmental Information Processing;Environmental Information Processing;Environmental Information Processing;Organismal Systems;Organismal Systems	Cancers;Signal transduction;Signal transduction;Signal transduction;Signal transduction;Signal transduction;Immune system;Endocrine system	ko05200//Pathways in cancer;ko04151//PI3K-Akt signaling pathway;ko04014//Ras signaling pathway;ko04010//MAPK signaling pathway;ko04015//Rap1 signaling pathway;ko04072//Phospholipase D signaling pathway;ko04640//Hematopoietic cell lineage;ko04916//Melanogenesis	K05461;K05461;K05461;K05461;K05461;K05461;K05461;K05461	GO:0005576//extracellular region;GO:0005615//extracellular space;GO:0005737//cytoplasm;GO:0005886//plasma membrane;GO:0016020//membrane;GO:0016021//integral component of membrane;GO:0030027//lamellipodium;GO:0030175//filopodium	GO:0005125//cytokine activity;GO:0005173//stem cell factor receptor binding;GO:0008083//growth factor activity	GO:0001755//neural crest cell migration;GO:0002687//positive regulation of leukocyte migration;GO:0002763//positive regulation of myeloid leukocyte differentiation;GO:0007155//cell adhesion;GO:0007165//signal transduction;GO:0008284//positive regulation of cell proliferation;GO:0008584//male gonad development;GO:0033026//negative regulation of mast cell apoptotic process;GO:0035162//embryonic hem…
novel_circ_014278	ENSBTAG00000016533	ENSBTAG00000019031	0.900104	1	5	1	miR-211-x	0.0431035	PLPPR4	phospholipid phosphatase related 4 [Source:VGNC Symbol;Acc:VGNC:55657]	-	-	-	-	GO:0005887//integral component of plasma membrane;GO:0016020//membrane;GO:0016021//integral component of membrane;GO:0098978//glutamatergic synapse;GO:0099061//integral component of postsynaptic density membrane	GO:0008195//phosphatidate phosphatase activity;GO:0042577//lipid phosphatase activity	GO:0006644//phospholipid metabolic process;GO:0007165//signal transduction;GO:0007409//axonogenesis;GO:0046839//phospholipid dephosphorylation;GO:0048839//inner ear development
novel_circ_014278	ENSBTAG00000016533	ENSBTAG00000046332	0.962835	1	3	1	miR-211-x	0.0258621	ACTA1	actin alpha 1, skeletal muscle [Source:VGNC Symbol;Acc:VGNC:25573]	-	-	-	-	GO:0001725//stress fiber;GO:0005865//striated muscle thin filament;GO:0005884//actin filament;GO:0015629//actin cytoskeleton;GO:0030017//sarcomere	-	GO:0030240//skeletal muscle thin filament assembly;GO:0048741//skeletal muscle fiber development
novel_circ_014387	ENSBTAG00000006786	ENSBTAG00000001143	0.981793	1	1	1	bta-miR-144	0.00862069	-	DAA31379.1 TPA: Interferon-induced guanylate-binding protein 1 (GTP-binding protein 1) (Guanine nucleotide-binding protein 1) (HuGBP-1)-like protein [Bos taurus]	Organismal Systems	Immune system	ko04621//NOD-like receptor signaling pathway	K20899	GO:0031410//cytoplasmic vesicle	GO:0003924//GTPase activity;GO:0005525//GTP binding	GO:0071346//cellular response to interferon-gamma
novel_circ_014387	ENSBTAG00000006786	ENSBTAG00000014530	0.931275	1	2	1	bta-miR-144	0.0172414	NTNG1	netrin G1 [Source:VGNC Symbol;Acc:VGNC:50086]	Environmental Information Processing;Organismal Systems	Signaling molecules and interaction;Development	ko04514//Cell adhesion molecules (CAMs);ko04360//Axon guidance	K07522;K07522	GO:0005886//plasma membrane;GO:0043256//laminin complex	GO:0050839//cell adhesion molecule binding;GO:0098632//cell-cell adhesion mediator activity	GO:0009887//animal organ morphogenesis;GO:0009888//tissue development;GO:0016477//cell migration;GO:0034446//substrate adhesion-dependent cell spreading;GO:0070831//basement membrane assembly;GO:0099560//synaptic membrane adhesion
novel_circ_014387	ENSBTAG00000006786	ENSBTAG00000016455	0.980441	1	5	1	bta-miR-144	0.0431035	CACHD1	cache domain containing 1 [Source:VGNC Symbol;Acc:VGNC:26671]	-	-	-	-	GO:0005891//voltage-gated calcium channel complex;GO:0016020//membrane;GO:0016021//integral component of membrane	GO:0005245//voltage-gated calcium channel activity	GO:0006811//ion transport;GO:0006816//calcium ion transport;GO:0070588//calcium ion transmembrane transport
novel_circ_014387	ENSBTAG00000006786	ENSBTAG00000017411	0.960054	1	1	1	bta-miR-144	0.00862069	AK5	adenylate kinase 5 [Source:VGNC Symbol;Acc:VGNC:25774]	Metabolism;Metabolism;Metabolism	Global and overview maps;Nucleotide metabolism;Metabolism of cofactors and vitamins	ko01100//Metabolic pathways;ko00230//Purine metabolism;ko00730//Thiamine metabolism	K00939;K00939;K00939	GO:0005737//cytoplasm;GO:0005829//cytosol;GO:0034451//centriolar satellite	GO:0004017//adenylate kinase activity;GO:0004550//nucleoside diphosphate kinase activity;GO:0005524//ATP binding;GO:0016301//kinase activity;GO:0016740//transferase activity;GO:0019205//nucleobase-containing compound kinase activity	GO:0006139//nucleobase-containing compound metabolic process;GO:0006165//nucleoside diphosphate phosphorylation;GO:0009142//nucleoside triphosphate biosynthetic process;GO:0016310//phosphorylation;GO:0046034//ATP metabolic process;GO:0046940//nucleoside monophosphate phosphorylation
novel_circ_014495	ENSBTAG00000007397	ENSBTAG00000004305	0.915239	1	4	1	miR-10926-z	0.0344828	RGS16	regulator of G protein signaling 16 [Source:VGNC Symbol;Acc:VGNC:33915]	-	-	-	-	GO:0005737//cytoplasm;GO:0016020//membrane;GO:0031224//intrinsic component of membrane	GO:0005096//GTPase activator activity	GO:0007186//G protein-coupled receptor signaling pathway;GO:0009968//negative regulation of signal transduction;GO:0043547//positive regulation of GTPase activity
novel_circ_014495	ENSBTAG00000007397	ENSBTAG00000007109	0.930082	1	1	1	miR-10926-z	0.00862069	ASB2	ankyrin repeat and SOCS box containing 2 [Source:VGNC Symbol;Acc:VGNC:26196]	-	-	-	-	GO:0000151//ubiquitin ligase complex	GO:0005515//protein binding;GO:0061630//ubiquitin protein ligase activity	GO:0006511//ubiquitin-dependent protein catabolic process;GO:0016567//protein ubiquitination;GO:0035556//intracellular signal transduction;GO:0035914//skeletal muscle cell differentiation
novel_circ_014495	ENSBTAG00000007397	ENSBTAG00000012144	0.971728	1	2	1	miR-10926-z	0.0172414	ZMYND19	zinc finger MYND-type containing 19 [Source:VGNC Symbol;Acc:VGNC:37205]	-	-	-	-	GO:0005737//cytoplasm;GO:0016020//membrane;GO:0045202//synapse	-	-
novel_circ_014495	ENSBTAG00000007397	ENSBTAG00000018307	0.945127	1	1	1	miR-10926-z	0.00862069	SEMA3F	semaphorin 3F [Source:VGNC Symbol;Acc:VGNC:34431]	Organismal Systems	Development	ko04360//Axon guidance	K06840	GO:0005615//extracellular space;GO:0005887//integral component of plasma membrane;GO:0098978//glutamatergic synapse	GO:0005515//protein binding;GO:0030215//semaphorin receptor binding;GO:0045499//chemorepellent activity	GO:0001755//neural crest cell migration;GO:0007411//axon guidance;GO:0021612//facial nerve structural organization;GO:0021637//trigeminal nerve structural organization;GO:0021675//nerve development;GO:0021785//branchiomotor neuron axon guidance;GO:0030335//positive regulation of cell migration;GO:0036486//ventral trunk neural crest cell migration;GO:0048843//negative regulation of axon extension …
novel_circ_014535	ENSBTAG00000014140	ENSBTAG00000004720	0.941468	2	2	1	miR-26-z	0.0343328	SULF1	sulfatase 1 [Source:VGNC Symbol;Acc:VGNC:53880]	-	-	-	-	GO:0005615//extracellular space;GO:0005783//endoplasmic reticulum;GO:0005794//Golgi apparatus;GO:0005795//Golgi stack;GO:0005886//plasma membrane;GO:0009986//cell surface;GO:0045121//membrane raft	GO:0003824//catalytic activity;GO:0004065//arylsulfatase activity;GO:0005509//calcium ion binding;GO:0008449//N-acetylglucosamine-6-sulfatase activity;GO:0008484//sulfuric ester hydrolase activity;GO:0016787//hydrolase activity;GO:0046872//metal ion binding	GO:0001502//cartilage condensation;GO:0001822//kidney development;GO:0001937//negative regulation of endothelial cell proliferation;GO:0002063//chondrocyte development;GO:0003094//glomerular filtration;GO:0007155//cell adhesion;GO:0010575//positive regulation of vascular endothelial growth factor production;GO:0014846//esophagus smooth muscle contraction;GO:0016525//negative regulation of angioge…
novel_circ_014627	ENSBTAG00000044185	ENSBTAG00000019870	0.987798	2	10	2	bta-miR-141|miR-141-y	0.00674663	SLC14A1	solute carrier family 14 member 1 [Source:VGNC Symbol;Acc:VGNC:53653]	-	-	-	-	GO:0005886//plasma membrane;GO:0005887//integral component of plasma membrane;GO:0016020//membrane;GO:0016021//integral component of membrane	GO:0005372//water transmembrane transporter activity;GO:0015204//urea transmembrane transporter activity;GO:0015265//urea channel activity;GO:0042802//identical protein binding	GO:0006833//water transport;GO:0015840//urea transport;GO:0071918//urea transmembrane transport
novel_circ_014647	NA	ENSBTAG00000012604	0.979961	14	2	2	miR-1296-x|miR-218-x	0.0136432	NCMAP	non-compact myelin associated protein [Source:VGNC Symbol;Acc:VGNC:31920]	-	-	-	-	GO:0005887//integral component of plasma membrane;GO:0016020//membrane;GO:0016021//integral component of membrane;GO:0033270//paranode region of axon;GO:0043220//Schmidt-Lanterman incisure	GO:0019911//structural constituent of myelin sheath	GO:0031641//regulation of myelination;GO:0032290//peripheral nervous system myelin formation
novel_circ_014647	NA	ENSBTAG00000019625	0.92866	14	9	6	bta-miR-135b|bta-miR-144|bta-miR-218|bta-miR-455-3p|miR-101-x|miR-218-x	6.99934e-05	EHHADH	enoyl-CoA hydratase and 3-hydroxyacyl CoA dehydrogenase [Source:VGNC Symbol;Acc:VGNC:53541]	Metabolism;Metabolism;Cellular Processes;Organismal Systems;Metabolism;Metabolism;Metabolism;Metabolism;Metabolism;Metabolism;Metabolism;Metabolism	Global and overview maps;Global and overview maps;Transport and catabolism;Endocrine system;Amino acid metabolism;Global and overview maps;Amino acid metabolism;Amino acid metabolism;Lipid metabolism;Metabolism of other amino acids;Carbohydrate metabolism;Carbohydrate metabolism	ko01100//Metabolic pathways;ko01200//Carbon metabolism;ko04146//Peroxisome;ko03320//PPAR signaling pathway;ko00310//Lysine degradation;ko01212//Fatty acid metabolism;ko00280//Valine, leucine and isoleucine degradation;ko00380//Tryptophan metabolism;ko00071//Fatty acid degradation;ko00410//beta-Alanine metabolism;ko00640//Propanoate metabolism;ko00650//Butanoate metabolism	K07514;K07514;K07514;K07514;K07514;K07514;K07514;K07514;K07514;K07514;K07514;K07514	GO:0005777//peroxisome	GO:0003824//catalytic activity;GO:0003857//3-hydroxyacyl-CoA dehydrogenase activity;GO:0004300//enoyl-CoA hydratase activity;GO:0016491//oxidoreductase activity;GO:0016509//long-chain-3-hydroxyacyl-CoA dehydrogenase activity;GO:0016616//oxidoreductase activity, acting on the CH-OH group of donors, NAD or NADP as acceptor;GO:0019899//enzyme binding;GO:0070403//NAD+ binding	GO:0006629//lipid metabolic process;GO:0006631//fatty acid metabolic process;GO:0006635//fatty acid beta-oxidation;GO:0055114//oxidation-reduction process
novel_circ_014933	ENSBTAG00000013781	ENSBTAG00000002640	0.963652	4	2	2	bta-miR-211|miR-211-x	0.00089955	KALRN	kalirin RhoGEF kinase [Source:VGNC Symbol;Acc:VGNC:30389]	-	-	-	-	-	GO:0000166//nucleotide binding;GO:0005085//guanyl-nucleotide exchange factor activity;GO:0005515//protein binding	GO:0007411//axon guidance;GO:0007417//central nervous system development;GO:0050790//regulation of catalytic activity
novel_circ_014933	ENSBTAG00000013781	ENSBTAG00000003574	0.980948	4	4	2	bta-miR-211|miR-211-x	0.00527147	SHISAL1	shisa like 1 [Source:VGNC Symbol;Acc:VGNC:30574]	-	-	-	-	GO:0016020//membrane;GO:0016021//integral component of membrane	-	-
novel_circ_014933	ENSBTAG00000013781	ENSBTAG00000003827	0.907474	4	7	2	bta-miR-211|miR-211-x	0.0178005	RIMS2	regulating synaptic membrane exocytosis 2 [Source:VGNC Symbol;Acc:VGNC:33972]	Organismal Systems	Endocrine system	ko04911//Insulin secretion	K15297	GO:0016020//membrane	GO:0031267//small GTPase binding	GO:0006887//exocytosis
novel_circ_014933	ENSBTAG00000013781	ENSBTAG00000005012	0.937627	4	2	2	bta-miR-211|miR-211-x	0.00089955	HSPH1	heat shock protein family H (Hsp110) member 1 [Source:VGNC Symbol;Acc:VGNC:53817]	Genetic Information Processing	Folding, sorting and degradation	ko04141//Protein processing in endoplasmic reticulum	K09485	GO:0005654//nucleoplasm;GO:0005737//cytoplasm;GO:0005829//cytosol;GO:0005874//microtubule;GO:0032991//protein-containing complex	GO:0000774//adenyl-nucleotide exchange factor activity;GO:0043014//alpha-tubulin binding	GO:0051085//chaperone cofactor-dependent protein refolding
novel_circ_014933	ENSBTAG00000013781	ENSBTAG00000005230	0.988365	4	3	2	bta-miR-211|miR-211-x	0.00266709	SHOX2	short stature homeobox 2 [Source:VGNC Symbol;Acc:VGNC:34606]	-	-	-	-	GO:0005634//nucleus	GO:0000981//DNA-binding transcription factor activity, RNA polymerase II-specific;GO:0003677//DNA binding;GO:1990837//sequence-specific double-stranded DNA binding	GO:0000122//negative regulation of transcription by RNA polymerase II;GO:0001649//osteoblast differentiation;GO:0002027//regulation of heart rate;GO:0002053//positive regulation of mesenchymal cell proliferation;GO:0002062//chondrocyte differentiation;GO:0002063//chondrocyte development;GO:0003163//sinoatrial node development;GO:0003170//heart valve development;GO:0003209//cardiac atrium morphoge…
novel_circ_014933	ENSBTAG00000013781	ENSBTAG00000007204	0.928642	4	4	2	bta-miR-211|miR-211-x	0.00527147	KRT80	keratin 80 [Source:VGNC Symbol;Acc:VGNC:30742]	-	-	-	-	GO:0005882//intermediate filament;GO:0045095//keratin filament;GO:0045111//intermediate filament cytoskeleton	-	-
novel_circ_014933	ENSBTAG00000013781	ENSBTAG00000011256	0.938928	4	1	1	miR-211-x	0.0344828	MYO1B	myosin IB [Source:VGNC Symbol;Acc:VGNC:31817]	Human Diseases	Infectious diseases	ko05130//Pathogenic Escherichia coli infection	K10356	GO:0005737//cytoplasm;GO:0005769//early endosome;GO:0005884//actin filament;GO:0005886//plasma membrane;GO:0005902//microvillus;GO:0005903//brush border;GO:0010008//endosome membrane;GO:0015629//actin cytoskeleton;GO:0016459//myosin complex;GO:0030175//filopodium;GO:0031982//vesicle;GO:0032588//trans-Golgi network membrane;GO:0048471//perinuclear region of cytoplasm;GO:0071944//cell periphery	GO:0000146//microfilament motor activity;GO:0000166//nucleotide binding;GO:0003774//motor activity;GO:0003779//actin binding;GO:0005515//protein binding;GO:0005524//ATP binding;GO:0005546//phosphatidylinositol-4,5-bisphosphate binding;GO:0005547//phosphatidylinositol-3,4,5-trisphosphate binding;GO:0030898//actin-dependent ATPase activity;GO:0051015//actin filament binding	GO:0006892//post-Golgi vesicle-mediated transport;GO:0007015//actin filament organization;GO:0030048//actin filament-based movement;GO:0030050//vesicle transport along actin filament;GO:0051017//actin filament bundle assembly
novel_circ_014933	ENSBTAG00000013781	ENSBTAG00000014194	0.956873	4	11	2	bta-miR-302b|miR-211-x	0.0444056	ADARB2	adenosine deaminase RNA specific B2 (inactive) [Source:NCBI gene (formerly Entrezgene);Acc:524061]	-	-	-	-	GO:0005730//nucleolus;GO:0005737//cytoplasm	GO:0003723//RNA binding;GO:0003725//double-stranded RNA binding;GO:0003726//double-stranded RNA adenosine deaminase activity;GO:0004000//adenosine deaminase activity;GO:0008251//tRNA-specific adenosine deaminase activity	GO:0006382//adenosine to inosine editing;GO:0006396//RNA processing
novel_circ_014933	ENSBTAG00000013781	ENSBTAG00000016455	0.915939	4	5	2	bta-miR-211|miR-211-x	0.00868196	CACHD1	cache domain containing 1 [Source:VGNC Symbol;Acc:VGNC:26671]	-	-	-	-	GO:0005891//voltage-gated calcium channel complex;GO:0016020//membrane;GO:0016021//integral component of membrane	GO:0005245//voltage-gated calcium channel activity	GO:0006811//ion transport;GO:0006816//calcium ion transport;GO:0070588//calcium ion transmembrane transport
novel_circ_014933	ENSBTAG00000013781	ENSBTAG00000016793	0.990754	4	1	1	bta-miR-302b	0.0344828	SLC35D3	solute carrier family 35 member D3 [Source:VGNC Symbol;Acc:VGNC:34829]	-	-	-	-	GO:0005769//early endosome;GO:0005783//endoplasmic reticulum;GO:0005794//Golgi apparatus;GO:0016020//membrane;GO:0016021//integral component of membrane	GO:0005461//UDP-glucuronic acid transmembrane transporter activity;GO:0005462//UDP-N-acetylglucosamine transmembrane transporter activity;GO:0005463//UDP-N-acetylgalactosamine transmembrane transporter activity;GO:0015297//antiporter activity	GO:0015787//UDP-glucuronic acid transmembrane transport;GO:0015789//UDP-N-acetylgalactosamine transmembrane transport;GO:0055085//transmembrane transport;GO:0070863//positive regulation of protein exit from endoplasmic reticulum;GO:0097009//energy homeostasis;GO:1990569//UDP-N-acetylglucosamine transmembrane transport
novel_circ_014933	ENSBTAG00000013781	ENSBTAG00000017802	0.953587	4	4	2	bta-miR-211|miR-211-x	0.00527147	THRB	thyroid hormone receptor beta [Source:VGNC Symbol;Acc:VGNC:35847]	Environmental Information Processing;Organismal Systems	Signaling molecules and interaction;Endocrine system	ko04080//Neuroactive ligand-receptor interaction;ko04919//Thyroid hormone signaling pathway	K08362;K08362	GO:0005634//nucleus;GO:0016604//nuclear body	GO:0000978//RNA polymerase II proximal promoter sequence-specific DNA binding;GO:0001225//RNA polymerase II transcription coactivator binding;GO:0003677//DNA binding;GO:0003682//chromatin binding;GO:0003700//DNA-binding transcription factor activity;GO:0004879//nuclear receptor activity;GO:0008270//zinc ion binding;GO:0019899//enzyme binding;GO:0031490//chromatin DNA binding;GO:0043565//sequence-…	GO:0000122//negative regulation of transcription by RNA polymerase II;GO:0002154//thyroid hormone mediated signaling pathway;GO:0006355//regulation of transcription, DNA-templated;GO:0006357//regulation of transcription by RNA polymerase II;GO:0007605//sensory perception of sound;GO:0007621//negative regulation of female receptivity;GO:0008016//regulation of heart contraction;GO:0008050//female c…
novel_circ_014933	ENSBTAG00000013781	ENSBTAG00000019008	0.947986	4	5	2	bta-miR-211|miR-211-x	0.00868196	FBXL16	F-box and leucine rich repeat protein 16 [Source:VGNC Symbol;Acc:VGNC:52773]	-	-	-	-	GO:0019005//SCF ubiquitin ligase complex	GO:0005515//protein binding	GO:0031146//SCF-dependent proteasomal ubiquitin-dependent protein catabolic process
novel_circ_014933	ENSBTAG00000013781	ENSBTAG00000049058	0.945826	4	8	3	bta-miR-211|bta-miR-302b|miR-211-x	0.00085444	INHBB	inhibin subunit beta B [Source:VGNC Symbol;Acc:VGNC:30201]	Environmental Information Processing;Cellular Processes;Environmental Information Processing	Signaling molecules and interaction;Cellular community - eukaryotes;Signal transduction	ko04060//Cytokine-cytokine receptor interaction;ko04550//Signaling pathways regulating pluripotency of stem cells;ko04350//TGF-beta signaling pathway	K22687;K22687;K22687	GO:0005576//extracellular region;GO:0005615//extracellular space;GO:0048471//perinuclear region of cytoplasm;GO:0071944//cell periphery	GO:0005125//cytokine activity;GO:0005179//hormone activity;GO:0008083//growth factor activity;GO:0042803//protein homodimerization activity	GO:0009267//cellular response to starvation;GO:0009611//response to wounding;GO:0010862//positive regulation of pathway-restricted SMAD protein phosphorylation;GO:0032686//negative regulation of hepatocyte growth factor production;GO:0032869//cellular response to insulin stimulus;GO:0032924//activin receptor signaling pathway;GO:0044320//cellular response to leptin stimulus;GO:0045444//fat cell d…
novel_circ_015017	ENSBTAG00000016541	ENSBTAG00000004119	0.909022	3	4	2	miR-128-x|novel-m0101-3p	0.00266709	NEUROD2	neuronal differentiation 2 [Source:VGNC Symbol;Acc:VGNC:32018]	-	-	-	-	GO:0005634//nucleus	GO:0000977//RNA polymerase II regulatory region sequence-specific DNA binding;GO:0000978//RNA polymerase II proximal promoter sequence-specific DNA binding;GO:0000981//DNA-binding transcription factor activity, RNA polymerase II-specific;GO:0001228//DNA-binding transcription activator activity, RNA polymerase II-specific;GO:0003677//DNA binding;GO:0003700//DNA-binding transcription factor activit…	GO:0001662//behavioral fear response;GO:0006355//regulation of transcription, DNA-templated;GO:0006357//regulation of transcription by RNA polymerase II;GO:0007275//multicellular organism development;GO:0007399//nervous system development;GO:0008306//associative learning;GO:0016567//protein ubiquitination;GO:0021695//cerebellar cortex development;GO:0030154//cell differentiation;GO:0030182//neuro…
novel_circ_015017	ENSBTAG00000016541	ENSBTAG00000054924	0.926794	3	4	2	miR-2299-y|novel-m0101-3p	0.00266709	CPLX2	complexin 2 [Source:NCBI gene (formerly Entrezgene);Acc:281711]	Organismal Systems	Nervous system	ko04721//Synaptic vesicle cycle	K15294	GO:0030054//cell junction;GO:0031201//SNARE complex;GO:0043195//terminal bouton;GO:0044305//calyx of Held;GO:0045202//synapse;GO:0098793//presynapse;GO:0098978//glutamatergic synapse	GO:0000149//SNARE binding;GO:0017075//syntaxin-1 binding;GO:0019905//syntaxin binding	GO:0006836//neurotransmitter transport;GO:0006887//exocytosis;GO:0016079//synaptic vesicle exocytosis;GO:0031630//regulation of synaptic vesicle fusion to presynaptic active zone membrane;GO:0031915//positive regulation of synaptic plasticity;GO:0046928//regulation of neurotransmitter secretion
novel_circ_015055	ENSBTAG00000002747	ENSBTAG00000005917	0.92982	3	8	3	bta-miR-141|bta-miR-200a|miR-141-y	0.000220942	PARD6G	par-6 family cell polarity regulator gamma [Source:VGNC Symbol;Acc:VGNC:32585]	Human Diseases;Environmental Information Processing;Cellular Processes;Cellular Processes;Organismal Systems;Environmental Information Processing	Infectious diseases;Signal transduction;Transport and catabolism;Cellular community - eukaryotes;Development;Signal transduction	ko05165//Human papillomavirus infection;ko04015//Rap1 signaling pathway;ko04144//Endocytosis;ko04530//Tight junction;ko04360//Axon guidance;ko04390//Hippo signaling pathway	K06093;K06093;K06093;K06093;K06093;K06093	GO:0005634//nucleus;GO:0005737//cytoplasm;GO:0005923//bicellular tight junction;GO:0005938//cell cortex;GO:0016020//membrane;GO:0016324//apical plasma membrane	GO:0005080//protein kinase C binding;GO:0005515//protein binding	GO:0007049//cell cycle;GO:0007098//centrosome cycle;GO:0007163//establishment or maintenance of cell polarity;GO:0051301//cell division;GO:0060341//regulation of cellular localization
novel_circ_015055	ENSBTAG00000002747	ENSBTAG00000007316	0.902686	3	2	2	bta-miR-141|miR-141-y	0.000449775	NDST3	N-deacetylase and N-sulfotransferase 3 [Source:VGNC Symbol;Acc:VGNC:53768]	Metabolism;Metabolism	Global and overview maps;Glycan biosynthesis and metabolism	ko01100//Metabolic pathways;ko00534//Glycosaminoglycan biosynthesis - heparan sulfate / heparin	K02578;K02578	GO:0016020//membrane;GO:0016021//integral component of membrane	GO:0008146//sulfotransferase activity;GO:0015016//[heparan sulfate]-glucosamine N-sulfotransferase activity;GO:0016787//hydrolase activity;GO:0102140//heparan sulfate N-deacetylase activity	GO:0015012//heparan sulfate proteoglycan biosynthetic process;GO:0015014//heparan sulfate proteoglycan biosynthetic process, polysaccharide chain biosynthetic process
novel_circ_015066	NA	ENSBTAG00000000257	0.975147	12	2	2	miR-211-x|miR-34-x	0.00989505	MRAP2	melanocortin 2 receptor accessory protein 2 [Source:VGNC Symbol;Acc:VGNC:31596]	-	-	-	-	GO:0005783//endoplasmic reticulum;GO:0005789//endoplasmic reticulum membrane;GO:0005886//plasma membrane;GO:0016020//membrane;GO:0016021//integral component of membrane	GO:0030545//receptor regulator activity;GO:0031780//corticotropin hormone receptor binding;GO:0031781//type 3 melanocortin receptor binding;GO:0031782//type 4 melanocortin receptor binding;GO:0031783//type 5 melanocortin receptor binding;GO:0042802//identical protein binding;GO:0070996//type 1 melanocortin receptor binding	GO:0006112//energy reserve metabolic process;GO:0007631//feeding behavior;GO:0072659//protein localization to plasma membrane;GO:0097009//energy homeostasis;GO:0106070//regulation of adenylate cyclase-activating G protein-coupled receptor signaling pathway;GO:0106071//positive regulation of adenylate cyclase-activating G protein-coupled receptor signaling pathway;GO:0106072//negative regulation o…
novel_circ_015066	NA	ENSBTAG00000001082	0.930863	12	3	2	miR-34-x|miR-497-y	0.0279492	SH2D5	SH2 domain containing 5 [Source:VGNC Symbol;Acc:VGNC:50133]	-	-	-	-	GO:0014069//postsynaptic density	-	-
novel_circ_015066	NA	ENSBTAG00000002997	0.932048	12	4	3	bta-miR-218|miR-218-x|miR-497-y	0.00326455	ADAMTSL1	ADAMTS like 1 [Source:VGNC Symbol;Acc:VGNC:58359]	-	-	-	-	GO:0031012//extracellular matrix	GO:0004222//metalloendopeptidase activity	GO:0006508//proteolysis;GO:0030198//extracellular matrix organization
novel_circ_015066	NA	ENSBTAG00000007204	0.957128	12	4	3	miR-211-x|miR-497-y|miR-8549-z	0.00326455	KRT80	keratin 80 [Source:VGNC Symbol;Acc:VGNC:30742]	-	-	-	-	GO:0005882//intermediate filament;GO:0045095//keratin filament;GO:0045111//intermediate filament cytoskeleton	-	-
novel_circ_015066	NA	ENSBTAG00000007514	0.962501	12	3	2	miR-10926-z|miR-34-x	0.0279492	CPNE5	copine 5 [Source:VGNC Symbol;Acc:VGNC:27661]	-	-	-	-	GO:0005886//plasma membrane;GO:0043005//neuron projection;GO:0043025//neuronal cell body	GO:0005544//calcium-dependent phospholipid binding	GO:0071277//cellular response to calcium ion;GO:1903861//positive regulation of dendrite extension
novel_circ_015066	NA	ENSBTAG00000013499	0.979738	12	4	3	bta-miR-218|miR-218-x|miR-497-y	0.00326455	LHX9	LIM homeobox 9 [Source:VGNC Symbol;Acc:VGNC:30878]	-	-	-	-	GO:0005634//nucleus	GO:0000981//DNA-binding transcription factor activity, RNA polymerase II-specific;GO:0003677//DNA binding;GO:0046872//metal ion binding;GO:1990837//sequence-specific double-stranded DNA binding	GO:0006355//regulation of transcription, DNA-templated;GO:0006357//regulation of transcription by RNA polymerase II;GO:0008283//cell proliferation;GO:0008584//male gonad development;GO:0008585//female gonad development;GO:0035262//gonad morphogenesis
novel_circ_015066	NA	ENSBTAG00000013974	0.982007	12	3	3	bta-miR-135b|miR-10926-z|miR-497-y	0.000867987	TMEM215	transmembrane protein 215 [Source:VGNC Symbol;Acc:VGNC:36037]	-	-	-	-	-	-	-
novel_circ_015173	ENSBTAG00000014828	ENSBTAG00000007913	0.919961	1	1	1	miR-26-z	0.00862069	CWC15	CWC15 spliceosome associated protein homolog [Source:VGNC Symbol;Acc:VGNC:54863]	Genetic Information Processing	Transcription	ko03040//Spliceosome	K12863	GO:0005634//nucleus;GO:0005681//spliceosomal complex;GO:0005739//mitochondrion;GO:0016607//nuclear speck;GO:0071007//U2-type catalytic step 2 spliceosome;GO:0071013//catalytic step 2 spliceosome	-	GO:0000398//mRNA splicing, via spliceosome
novel_circ_015173	ENSBTAG00000014828	ENSBTAG00000016963	0.976178	1	1	1	miR-26-z	0.00862069	ADAMTS6	ADAM metallopeptidase with thrombospondin type 1 motif 6 [Source:VGNC Symbol;Acc:VGNC:25628]	-	-	-	-	GO:0005576//extracellular region;GO:0031012//extracellular matrix	GO:0004222//metalloendopeptidase activity;GO:0008233//peptidase activity;GO:0008237//metallopeptidase activity;GO:0016787//hydrolase activity;GO:0046872//metal ion binding	GO:0001822//kidney development;GO:0003279//cardiac septum development;GO:0006508//proteolysis;GO:0007507//heart development;GO:0030198//extracellular matrix organization;GO:0035904//aorta development;GO:0060976//coronary vasculature development
novel_circ_015284	ENSBTAG00000021941	ENSBTAG00000019870	0.953393	7	10	3	bta-miR-141|bta-miR-200c|miR-141-y	0.0136842	SLC14A1	solute carrier family 14 member 1 [Source:VGNC Symbol;Acc:VGNC:53653]	-	-	-	-	GO:0005886//plasma membrane;GO:0005887//integral component of plasma membrane;GO:0016020//membrane;GO:0016021//integral component of membrane	GO:0005372//water transmembrane transporter activity;GO:0015204//urea transmembrane transporter activity;GO:0015265//urea channel activity;GO:0042802//identical protein binding	GO:0006833//water transport;GO:0015840//urea transport;GO:0071918//urea transmembrane transport
novel_circ_015333	ENSBTAG00000020296	ENSBTAG00000020159	0.911111	4	5	2	bta-miR-137|miR-137-x	0.00868196	NKAIN1	sodium/potassium transporting ATPase interacting 1 [Source:VGNC Symbol;Acc:VGNC:32091]	-	-	-	-	GO:0005886//plasma membrane;GO:0016020//membrane;GO:0016021//integral component of membrane	GO:0051117//ATPase binding	-
novel_circ_015333	ENSBTAG00000020296	ENSBTAG00000050359	0.957702	4	1	1	miR-485-y	0.0344828	-	XP_010861487.1 PREDICTED: zinc finger protein 616-like isoform X2 [Bison bison bison]	Human Diseases	Infectious diseases	ko05168//Herpes simplex infection	K09228	-	GO:0000978//RNA polymerase II proximal promoter sequence-specific DNA binding;GO:0000981//DNA-binding transcription factor activity, RNA polymerase II-specific	GO:0006355//regulation of transcription, DNA-templated;GO:0006357//regulation of transcription by RNA polymerase II
novel_circ_015465	ENSBTAG00000001176	ENSBTAG00000017390	0.950373	3	1	1	miR-11977-z	0.0258621	LGI2	leucine rich repeat LGI family member 2 [Source:VGNC Symbol;Acc:VGNC:30857]	-	-	-	-	GO:0005576//extracellular region	GO:0005515//protein binding	GO:1904862//inhibitory synapse assembly
novel_circ_015497	ENSBTAG00000012848	ENSBTAG00000013689	0.904704	2	2	1	bta-miR-455-5p	0.0343328	MCTP2	multiple C2 and transmembrane domain containing 2 [Source:VGNC Symbol;Acc:VGNC:31324]	-	-	-	-	GO:0005654//nucleoplasm;GO:0005829//cytosol;GO:0016020//membrane;GO:0016021//integral component of membrane;GO:0030672//synaptic vesicle membrane	GO:0005509//calcium ion binding	GO:0046928//regulation of neurotransmitter secretion
novel_circ_015531	ENSBTAG00000021125	ENSBTAG00000017866	0.965125	2	5	2	bta-miR-105a|bta-miR-200b	0.00149925	CD36	CD36 molecule [Source:NCBI gene (formerly Entrezgene);Acc:281052]	Cellular Processes;Organismal Systems;Environmental Information Processing;Human Diseases;Human Diseases;Environmental Information Processing;Organismal Systems;Organismal Systems;Organismal Systems;Organismal Systems	Transport and catabolism;Immune system;Signal transduction;Infectious diseases;Endocrine and metabolic diseases;Signaling molecules and interaction;Endocrine system;Endocrine system;Digestive system;Digestive system	ko04145//Phagosome;ko04640//Hematopoietic cell lineage;ko04152//AMPK signaling pathway;ko05144//Malaria;ko04931//Insulin resistance;ko04512//ECM-receptor interaction;ko03320//PPAR signaling pathway;ko04920//Adipocytokine signaling pathway;ko04979//Cholesterol metabolism;ko04975//Fat digestion and absorption	K06259;K06259;K06259;K06259;K06259;K06259;K06259;K06259;K06259;K06259	GO:0005794//Golgi apparatus;GO:0005886//plasma membrane;GO:0016020//membrane;GO:0016021//integral component of membrane;GO:0016324//apical plasma membrane	-	GO:0006955//immune response;GO:0007155//cell adhesion;GO:0007166//cell surface receptor signaling pathway
novel_circ_015745	ENSBTAG00000021577	ENSBTAG00000016793	0.908296	2	1	1	bta-miR-302b	0.0172414	SLC35D3	solute carrier family 35 member D3 [Source:VGNC Symbol;Acc:VGNC:34829]	-	-	-	-	GO:0005769//early endosome;GO:0005783//endoplasmic reticulum;GO:0005794//Golgi apparatus;GO:0016020//membrane;GO:0016021//integral component of membrane	GO:0005461//UDP-glucuronic acid transmembrane transporter activity;GO:0005462//UDP-N-acetylglucosamine transmembrane transporter activity;GO:0005463//UDP-N-acetylgalactosamine transmembrane transporter activity;GO:0015297//antiporter activity	GO:0015787//UDP-glucuronic acid transmembrane transport;GO:0015789//UDP-N-acetylgalactosamine transmembrane transport;GO:0055085//transmembrane transport;GO:0070863//positive regulation of protein exit from endoplasmic reticulum;GO:0097009//energy homeostasis;GO:1990569//UDP-N-acetylglucosamine transmembrane transport
novel_circ_015834	ENSBTAG00000016915	ENSBTAG00000008571	0.905045	1	3	1	bta-miR-302b	0.0258621	CUX2	cut like homeobox 2 [Source:VGNC Symbol;Acc:VGNC:27840]	-	-	-	-	GO:0005634//nucleus	GO:0000977//RNA polymerase II regulatory region sequence-specific DNA binding;GO:0000978//RNA polymerase II proximal promoter sequence-specific DNA binding;GO:0000981//DNA-binding transcription factor activity, RNA polymerase II-specific;GO:0001227//DNA-binding transcription repressor activity, RNA polymerase II-specific;GO:0003677//DNA binding;GO:0043565//sequence-specific DNA binding;GO:1990837…	GO:0000122//negative regulation of transcription by RNA polymerase II;GO:0006355//regulation of transcription, DNA-templated;GO:0006357//regulation of transcription by RNA polymerase II;GO:0007614//short-term memory;GO:0010628//positive regulation of gene expression;GO:0045892//negative regulation of transcription, DNA-templated;GO:0050775//positive regulation of dendrite morphogenesis;GO:0050890…
novel_circ_015871	ENSBTAG00000002888	ENSBTAG00000051600	0.924675	8	4	2	bta-miR-218|bta-miR-302b	0.0234492	-	XP_032263750.1 A-kinase anchoring protein 7 isoform X3 [Phoca vitulina]	-	-	-	-	GO:0005829//cytosol	GO:0034237//protein kinase A regulatory subunit binding	GO:0010738//regulation of protein kinase A signaling
novel_circ_015873	ENSBTAG00000002691	ENSBTAG00000051600	0.960301	2	4	2	bta-miR-302a|bta-miR-302b	0.00089955	-	XP_032263750.1 A-kinase anchoring protein 7 isoform X3 [Phoca vitulina]	-	-	-	-	GO:0005829//cytosol	GO:0034237//protein kinase A regulatory subunit binding	GO:0010738//regulation of protein kinase A signaling
novel_circ_015886	ENSBTAG00000019210	ENSBTAG00000000199	0.916008	1	3	1	bta-miR-135b	0.0258621	PDP1	pyruvate dehyrogenase phosphatase catalytic subunit 1 [Source:VGNC Symbol;Acc:VGNC:32713]	-	-	-	-	-	GO:0004721//phosphoprotein phosphatase activity;GO:0004722//protein serine/threonine phosphatase activity;GO:0016787//hydrolase activity;GO:0016791//phosphatase activity;GO:0043169//cation binding;GO:0046872//metal ion binding	GO:0006470//protein dephosphorylation;GO:0035970//peptidyl-threonine dephosphorylation
novel_circ_015886	ENSBTAG00000019210	ENSBTAG00000010866	0.982616	1	1	1	bta-miR-135b	0.00862069	BMPER	BMP binding endothelial regulator [Source:VGNC Symbol;Acc:VGNC:26523]	-	-	-	-	GO:0005576//extracellular region;GO:0005615//extracellular space;GO:0031012//extracellular matrix	GO:0005515//protein binding	GO:0001568//blood vessel development;GO:0001657//ureteric bud development;GO:0002043//blood vessel endothelial cell proliferation involved in sprouting angiogenesis;GO:0010594//regulation of endothelial cell migration;GO:0030514//negative regulation of BMP signaling pathway;GO:0042118//endothelial cell activation;GO:0045765//regulation of angiogenesis;GO:0048839//inner ear development;GO:0060393/…
novel_circ_015886	ENSBTAG00000019210	ENSBTAG00000014530	0.944794	1	2	1	bta-miR-135b	0.0172414	NTNG1	netrin G1 [Source:VGNC Symbol;Acc:VGNC:50086]	Environmental Information Processing;Organismal Systems	Signaling molecules and interaction;Development	ko04514//Cell adhesion molecules (CAMs);ko04360//Axon guidance	K07522;K07522	GO:0005886//plasma membrane;GO:0043256//laminin complex	GO:0050839//cell adhesion molecule binding;GO:0098632//cell-cell adhesion mediator activity	GO:0009887//animal organ morphogenesis;GO:0009888//tissue development;GO:0016477//cell migration;GO:0034446//substrate adhesion-dependent cell spreading;GO:0070831//basement membrane assembly;GO:0099560//synaptic membrane adhesion
novel_circ_015886	ENSBTAG00000019210	ENSBTAG00000017802	0.923501	1	4	1	bta-miR-135b	0.0344828	THRB	thyroid hormone receptor beta [Source:VGNC Symbol;Acc:VGNC:35847]	Environmental Information Processing;Organismal Systems	Signaling molecules and interaction;Endocrine system	ko04080//Neuroactive ligand-receptor interaction;ko04919//Thyroid hormone signaling pathway	K08362;K08362	GO:0005634//nucleus;GO:0016604//nuclear body	GO:0000978//RNA polymerase II proximal promoter sequence-specific DNA binding;GO:0001225//RNA polymerase II transcription coactivator binding;GO:0003677//DNA binding;GO:0003682//chromatin binding;GO:0003700//DNA-binding transcription factor activity;GO:0004879//nuclear receptor activity;GO:0008270//zinc ion binding;GO:0019899//enzyme binding;GO:0031490//chromatin DNA binding;GO:0043565//sequence-…	GO:0000122//negative regulation of transcription by RNA polymerase II;GO:0002154//thyroid hormone mediated signaling pathway;GO:0006355//regulation of transcription, DNA-templated;GO:0006357//regulation of transcription by RNA polymerase II;GO:0007605//sensory perception of sound;GO:0007621//negative regulation of female receptivity;GO:0008016//regulation of heart contraction;GO:0008050//female c…
novel_circ_015886	ENSBTAG00000019210	ENSBTAG00000019008	0.902312	1	5	1	bta-miR-135b	0.0431035	FBXL16	F-box and leucine rich repeat protein 16 [Source:VGNC Symbol;Acc:VGNC:52773]	-	-	-	-	GO:0019005//SCF ubiquitin ligase complex	GO:0005515//protein binding	GO:0031146//SCF-dependent proteasomal ubiquitin-dependent protein catabolic process
novel_circ_015886	ENSBTAG00000019210	ENSBTAG00000021574	0.963136	1	4	1	bta-miR-135b	0.0344828	TCF7L2	transcription factor 7 like 2 [Source:VGNC Symbol;Acc:VGNC:55976]	Human Diseases;Human Diseases;Human Diseases;Human Diseases;Environmental Information Processing;Environmental Information Processing;Human Diseases;Human Diseases;Human Diseases;Organismal Systems;Human Diseases;Human Diseases;Human Diseases;Cellular Processes;Human Diseases;Human Diseases;Human Diseases;Human Diseases	Cancers;Infectious diseases;Infectious diseases;Cancers;Signal transduction;Signal transduction;Endocrine and metabolic diseases;Cancers;Cancers;Endocrine system;Cancers;Cancers;Cardiovascular diseases;Cellular community - eukaryotes;Cancers;Cancers;Cancers;Cancers	ko05200//Pathways in cancer;ko05165//Human papillomavirus infection;ko05132//Salmonella infection;ko05225//Hepatocellular carcinoma;ko04310//Wnt signaling pathway;ko04390//Hippo signaling pathway;ko04934//Cushing syndrome;ko05226//Gastric cancer;ko05224//Breast cancer;ko04916//Melanogenesis;ko05215//Prostate cancer;ko05210//Colorectal cancer;ko05412//Arrhythmogenic right ventricular cardiomyopath…	K04491;K04491;K04491;K04491;K04491;K04491;K04491;K04491;K04491;K04491;K04491;K04491;K04491;K04491;K04491;K04491;K04491;K04491	GO:0000785//chromatin;GO:0005634//nucleus;GO:0005654//nucleoplasm;GO:0032993//protein-DNA complex;GO:0070369//beta-catenin-TCF7L2 complex;GO:0071664//catenin-TCF7L2 complex;GO:1990907//beta-catenin-TCF complex	GO:0000976//transcription regulatory region sequence-specific DNA binding;GO:0000978//RNA polymerase II proximal promoter sequence-specific DNA binding;GO:0000981//DNA-binding transcription factor activity, RNA polymerase II-specific;GO:0001103//RNA polymerase II repressing transcription factor binding;GO:0003677//DNA binding;GO:0003700//DNA-binding transcription factor activity;GO:0008013//beta-…	GO:0000122//negative regulation of transcription by RNA polymerase II;GO:0001568//blood vessel development;GO:0006357//regulation of transcription by RNA polymerase II;GO:0007050//cell cycle arrest;GO:0010909//positive regulation of heparan sulfate proteoglycan biosynthetic process;GO:0016055//Wnt signaling pathway;GO:0032024//positive regulation of insulin secretion;GO:0032092//positive regulati…
novel_circ_015913	ENSBTAG00000005218	ENSBTAG00000021574	0.91748	1	4	1	miR-382-x	0.0344828	TCF7L2	transcription factor 7 like 2 [Source:VGNC Symbol;Acc:VGNC:55976]	Human Diseases;Human Diseases;Human Diseases;Human Diseases;Environmental Information Processing;Environmental Information Processing;Human Diseases;Human Diseases;Human Diseases;Organismal Systems;Human Diseases;Human Diseases;Human Diseases;Cellular Processes;Human Diseases;Human Diseases;Human Diseases;Human Diseases	Cancers;Infectious diseases;Infectious diseases;Cancers;Signal transduction;Signal transduction;Endocrine and metabolic diseases;Cancers;Cancers;Endocrine system;Cancers;Cancers;Cardiovascular diseases;Cellular community - eukaryotes;Cancers;Cancers;Cancers;Cancers	ko05200//Pathways in cancer;ko05165//Human papillomavirus infection;ko05132//Salmonella infection;ko05225//Hepatocellular carcinoma;ko04310//Wnt signaling pathway;ko04390//Hippo signaling pathway;ko04934//Cushing syndrome;ko05226//Gastric cancer;ko05224//Breast cancer;ko04916//Melanogenesis;ko05215//Prostate cancer;ko05210//Colorectal cancer;ko05412//Arrhythmogenic right ventricular cardiomyopath…	K04491;K04491;K04491;K04491;K04491;K04491;K04491;K04491;K04491;K04491;K04491;K04491;K04491;K04491;K04491;K04491;K04491;K04491	GO:0000785//chromatin;GO:0005634//nucleus;GO:0005654//nucleoplasm;GO:0032993//protein-DNA complex;GO:0070369//beta-catenin-TCF7L2 complex;GO:0071664//catenin-TCF7L2 complex;GO:1990907//beta-catenin-TCF complex	GO:0000976//transcription regulatory region sequence-specific DNA binding;GO:0000978//RNA polymerase II proximal promoter sequence-specific DNA binding;GO:0000981//DNA-binding transcription factor activity, RNA polymerase II-specific;GO:0001103//RNA polymerase II repressing transcription factor binding;GO:0003677//DNA binding;GO:0003700//DNA-binding transcription factor activity;GO:0008013//beta-…	GO:0000122//negative regulation of transcription by RNA polymerase II;GO:0001568//blood vessel development;GO:0006357//regulation of transcription by RNA polymerase II;GO:0007050//cell cycle arrest;GO:0010909//positive regulation of heparan sulfate proteoglycan biosynthetic process;GO:0016055//Wnt signaling pathway;GO:0032024//positive regulation of insulin secretion;GO:0032092//positive regulati…
novel_circ_015945	ENSBTAG00000000088	ENSBTAG00000014758	0.982244	1	3	1	bta-miR-33a	0.0258621	WIF1	WNT inhibitory factor 1 [Source:VGNC Symbol;Acc:VGNC:36938]	Environmental Information Processing	Signal transduction	ko04310//Wnt signaling pathway	K01691	GO:0005576//extracellular region;GO:0009986//cell surface	GO:0005102//signaling receptor binding	GO:0045600//positive regulation of fat cell differentiation;GO:0048856//anatomical structure development
novel_circ_015945	ENSBTAG00000000088	ENSBTAG00000051421	0.925049	1	1	1	bta-miR-33a	0.00862069	PCP4	Purkinje cell protein 4 [Source:NCBI gene (formerly Entrezgene);Acc:768324]	-	-	-	-	GO:0032991//protein-containing complex	GO:0005509//calcium ion binding;GO:0005516//calmodulin binding	GO:0045666//positive regulation of neuron differentiation;GO:0099004//calmodulin dependent kinase signaling pathway
novel_circ_015969	ENSBTAG00000004145	ENSBTAG00000014530	0.902631	1	2	1	bta-miR-144	0.0172414	NTNG1	netrin G1 [Source:VGNC Symbol;Acc:VGNC:50086]	Environmental Information Processing;Organismal Systems	Signaling molecules and interaction;Development	ko04514//Cell adhesion molecules (CAMs);ko04360//Axon guidance	K07522;K07522	GO:0005886//plasma membrane;GO:0043256//laminin complex	GO:0050839//cell adhesion molecule binding;GO:0098632//cell-cell adhesion mediator activity	GO:0009887//animal organ morphogenesis;GO:0009888//tissue development;GO:0016477//cell migration;GO:0034446//substrate adhesion-dependent cell spreading;GO:0070831//basement membrane assembly;GO:0099560//synaptic membrane adhesion
novel_circ_015974	ENSBTAG00000034269	ENSBTAG00000002390	0.938519	2	1	1	miR-10926-z	0.0172414	CCDC184	coiled-coil domain containing 184 [Source:VGNC Symbol;Acc:VGNC:26879]	-	-	-	-	GO:0005737//cytoplasm	-	-
novel_circ_015974	ENSBTAG00000034269	ENSBTAG00000007109	0.923584	2	1	1	miR-10926-z	0.0172414	ASB2	ankyrin repeat and SOCS box containing 2 [Source:VGNC Symbol;Acc:VGNC:26196]	-	-	-	-	GO:0000151//ubiquitin ligase complex	GO:0005515//protein binding;GO:0061630//ubiquitin protein ligase activity	GO:0006511//ubiquitin-dependent protein catabolic process;GO:0016567//protein ubiquitination;GO:0035556//intracellular signal transduction;GO:0035914//skeletal muscle cell differentiation
novel_circ_015974	ENSBTAG00000034269	ENSBTAG00000014194	0.938507	2	11	2	bta-miR-302b|miR-10926-z	0.00824588	ADARB2	adenosine deaminase RNA specific B2 (inactive) [Source:NCBI gene (formerly Entrezgene);Acc:524061]	-	-	-	-	GO:0005730//nucleolus;GO:0005737//cytoplasm	GO:0003723//RNA binding;GO:0003725//double-stranded RNA binding;GO:0003726//double-stranded RNA adenosine deaminase activity;GO:0004000//adenosine deaminase activity;GO:0008251//tRNA-specific adenosine deaminase activity	GO:0006382//adenosine to inosine editing;GO:0006396//RNA processing
novel_circ_015974	ENSBTAG00000034269	ENSBTAG00000016793	0.940666	2	1	1	bta-miR-302b	0.0172414	SLC35D3	solute carrier family 35 member D3 [Source:VGNC Symbol;Acc:VGNC:34829]	-	-	-	-	GO:0005769//early endosome;GO:0005783//endoplasmic reticulum;GO:0005794//Golgi apparatus;GO:0016020//membrane;GO:0016021//integral component of membrane	GO:0005461//UDP-glucuronic acid transmembrane transporter activity;GO:0005462//UDP-N-acetylglucosamine transmembrane transporter activity;GO:0005463//UDP-N-acetylgalactosamine transmembrane transporter activity;GO:0015297//antiporter activity	GO:0015787//UDP-glucuronic acid transmembrane transport;GO:0015789//UDP-N-acetylgalactosamine transmembrane transport;GO:0055085//transmembrane transport;GO:0070863//positive regulation of protein exit from endoplasmic reticulum;GO:0097009//energy homeostasis;GO:1990569//UDP-N-acetylglucosamine transmembrane transport
novel_circ_015974	ENSBTAG00000034269	ENSBTAG00000021727	0.97155	2	2	1	miR-10926-z	0.0343328	NTSR1	neurotensin receptor 1 [Source:VGNC Symbol;Acc:VGNC:32312]	Environmental Information Processing;Environmental Information Processing	Signaling molecules and interaction;Signal transduction	ko04080//Neuroactive ligand-receptor interaction;ko04020//Calcium signaling pathway	K04211;K04211	GO:0005886//plasma membrane;GO:0005887//integral component of plasma membrane;GO:0016020//membrane;GO:0016021//integral component of membrane;GO:0045121//membrane raft	GO:0004930//G protein-coupled receptor activity;GO:0016492//G protein-coupled neurotensin receptor activity;GO:0042802//identical protein binding	GO:0007165//signal transduction;GO:0007186//G protein-coupled receptor signaling pathway;GO:0007218//neuropeptide signaling pathway;GO:0008344//adult locomotory behavior;GO:0043066//negative regulation of apoptotic process
novel_circ_015974	ENSBTAG00000034269	ENSBTAG00000035958	0.947599	2	1	1	miR-10926-z	0.0172414	RHOBTB2	Rho-related BTB domain containing 2 [Source:NCBI gene (formerly Entrezgene);Acc:784567]	Genetic Information Processing	Folding, sorting and degradation	ko04120//Ubiquitin mediated proteolysis	K07868	GO:0005856//cytoskeleton;GO:0005886//plasma membrane;GO:0005938//cell cortex;GO:0031410//cytoplasmic vesicle;GO:0042995//cell projection;GO:0043231//intracellular membrane-bounded organelle	GO:0003924//GTPase activity;GO:0005515//protein binding;GO:0005525//GTP binding;GO:0019901//protein kinase binding	GO:0007015//actin filament organization;GO:0007163//establishment or maintenance of cell polarity;GO:0007264//small GTPase mediated signal transduction;GO:0008360//regulation of cell shape;GO:0030865//cortical cytoskeleton organization;GO:0032956//regulation of actin cytoskeleton organization;GO:0043652//engulfment of apoptotic cell
novel_circ_016187	ENSBTAG00000015277	ENSBTAG00000002174	0.974337	16	3	2	bta-miR-105a|bta-miR-200a	0.0495542	RERG	RAS like estrogen regulated growth inhibitor [Source:VGNC Symbol;Acc:VGNC:33873]	-	-	-	-	GO:0001650//fibrillar center;GO:0005634//nucleus;GO:0005654//nucleoplasm;GO:0005829//cytosol;GO:0016020//membrane	GO:0003924//GTPase activity;GO:0005525//GTP binding	GO:0007165//signal transduction;GO:0008285//negative regulation of cell proliferation;GO:0009725//response to hormone;GO:0030308//negative regulation of cell growth
novel_circ_016187	ENSBTAG00000015277	ENSBTAG00000005917	0.94063	16	8	5	bta-miR-105a|bta-miR-141|bta-miR-200a|bta-miR-507-3p|miR-141-y	0.00117598	PARD6G	par-6 family cell polarity regulator gamma [Source:VGNC Symbol;Acc:VGNC:32585]	Human Diseases;Environmental Information Processing;Cellular Processes;Cellular Processes;Organismal Systems;Environmental Information Processing	Infectious diseases;Signal transduction;Transport and catabolism;Cellular community - eukaryotes;Development;Signal transduction	ko05165//Human papillomavirus infection;ko04015//Rap1 signaling pathway;ko04144//Endocytosis;ko04530//Tight junction;ko04360//Axon guidance;ko04390//Hippo signaling pathway	K06093;K06093;K06093;K06093;K06093;K06093	GO:0005634//nucleus;GO:0005737//cytoplasm;GO:0005923//bicellular tight junction;GO:0005938//cell cortex;GO:0016020//membrane;GO:0016324//apical plasma membrane	GO:0005080//protein kinase C binding;GO:0005515//protein binding	GO:0007049//cell cycle;GO:0007098//centrosome cycle;GO:0007163//establishment or maintenance of cell polarity;GO:0051301//cell division;GO:0060341//regulation of cellular localization
novel_circ_016187	ENSBTAG00000015277	ENSBTAG00000007316	0.990517	16	2	2	bta-miR-141|miR-141-y	0.017991	NDST3	N-deacetylase and N-sulfotransferase 3 [Source:VGNC Symbol;Acc:VGNC:53768]	Metabolism;Metabolism	Global and overview maps;Glycan biosynthesis and metabolism	ko01100//Metabolic pathways;ko00534//Glycosaminoglycan biosynthesis - heparan sulfate / heparin	K02578;K02578	GO:0016020//membrane;GO:0016021//integral component of membrane	GO:0008146//sulfotransferase activity;GO:0015016//[heparan sulfate]-glucosamine N-sulfotransferase activity;GO:0016787//hydrolase activity;GO:0102140//heparan sulfate N-deacetylase activity	GO:0015012//heparan sulfate proteoglycan biosynthetic process;GO:0015014//heparan sulfate proteoglycan biosynthetic process, polysaccharide chain biosynthetic process
novel_circ_016187	ENSBTAG00000015277	ENSBTAG00000019091	0.916174	16	2	2	bta-miR-200a|novel-m0094-3p	0.017991	RNPC3	RNA binding region (RNP1, RRM) containing 3 [Source:NCBI gene (formerly Entrezgene);Acc:768060]	-	-	-	-	GO:0005634//nucleus;GO:0005654//nucleoplasm;GO:0005689//U12-type spliceosomal complex	GO:0003676//nucleic acid binding;GO:0003723//RNA binding;GO:0005515//protein binding	-
novel_circ_016187	ENSBTAG00000015277	ENSBTAG00000031346	0.973003	16	4	3	bta-miR-105a|bta-miR-375|miR-11977-z	0.00807514	ANKUB1	ankyrin repeat and ubiquitin domain containing 1 [Source:VGNC Symbol;Acc:VGNC:25948]	-	-	-	-	-	GO:0005515//protein binding	-
novel_circ_016288	ENSBTAG00000038920	ENSBTAG00000007703	0.919149	1	4	1	bta-miR-302b	0.0344828	NMT2	N-myristoyltransferase 2 [Source:VGNC Symbol;Acc:VGNC:32138]	-	-	-	-	GO:0005737//cytoplasm;GO:0005794//Golgi apparatus;GO:0005829//cytosol;GO:0005886//plasma membrane;GO:0019898//extrinsic component of membrane	GO:0004379//glycylpeptide N-tetradecanoyltransferase activity;GO:0016740//transferase activity;GO:0016746//transferase activity, transferring acyl groups	GO:0006499//N-terminal protein myristoylation;GO:0018008//N-terminal peptidyl-glycine N-myristoylation
novel_circ_016288	ENSBTAG00000038920	ENSBTAG00000051600	0.931888	1	4	1	bta-miR-302b	0.0344828	-	XP_032263750.1 A-kinase anchoring protein 7 isoform X3 [Phoca vitulina]	-	-	-	-	GO:0005829//cytosol	GO:0034237//protein kinase A regulatory subunit binding	GO:0010738//regulation of protein kinase A signaling
novel_circ_016414	ENSBTAG00000046256	ENSBTAG00000010793	0.951086	3	1	1	miR-34-x	0.0258621	CCDC80	coiled-coil domain containing 80 [Source:VGNC Symbol;Acc:VGNC:26918]	-	-	-	-	GO:0005604//basement membrane;GO:0005614//interstitial matrix;GO:0016020//membrane;GO:0016021//integral component of membrane;GO:0031012//extracellular matrix	GO:0001968//fibronectin binding;GO:0005539//glycosaminoglycan binding;GO:0008201//heparin binding	GO:0009617//response to bacterium;GO:0010811//positive regulation of cell-substrate adhesion;GO:0030198//extracellular matrix organization
novel_circ_016414	ENSBTAG00000046256	ENSBTAG00000012976	0.935965	3	1	1	miR-497-y	0.0258621	WLS	Wnt ligand secretion mediator [Source:VGNC Symbol;Acc:VGNC:36948]	-	-	-	-	GO:0000139//Golgi membrane;GO:0005769//early endosome;GO:0005783//endoplasmic reticulum;GO:0005794//Golgi apparatus;GO:0005802//trans-Golgi network;GO:0005829//cytosol;GO:0005886//plasma membrane;GO:0012505//endomembrane system;GO:0016020//membrane;GO:0016021//integral component of membrane;GO:0031301//integral component of organelle membrane;GO:0031410//cytoplasmic vesicle	GO:0017147//Wnt-protein binding	GO:0006886//intracellular protein transport;GO:0007275//multicellular organism development;GO:0016055//Wnt signaling pathway;GO:0030177//positive regulation of Wnt signaling pathway;GO:0061355//Wnt protein secretion;GO:0061357//positive regulation of Wnt protein secretion;GO:0090263//positive regulation of canonical Wnt signaling pathway
novel_circ_016414	ENSBTAG00000046256	ENSBTAG00000014968	0.903348	3	1	1	miR-34-x	0.0258621	YJEFN3	YjeF N-terminal domain containing 3 [Source:VGNC Symbol;Acc:VGNC:97329]	-	-	-	-	GO:0005739//mitochondrion	GO:0052856//NADHX epimerase activity;GO:0052857//NADPHX epimerase activity	-
novel_circ_016414	ENSBTAG00000046256	ENSBTAG00000016741	0.953081	3	1	1	miR-497-y	0.0258621	TOX2	TOX high mobility group box family member 2 [Source:VGNC Symbol;Acc:VGNC:55084]	-	-	-	-	GO:0005634//nucleus;GO:0005654//nucleoplasm	GO:0003677//DNA binding;GO:0003713//transcription coactivator activity;GO:0031490//chromatin DNA binding	GO:0006357//regulation of transcription by RNA polymerase II;GO:0045944//positive regulation of transcription by RNA polymerase II
novel_circ_016414	ENSBTAG00000046256	ENSBTAG00000017198	0.952389	3	4	2	miR-34-x|miR-497-y	0.00266709	CHRNA4	cholinergic receptor nicotinic alpha 4 subunit [Source:VGNC Symbol;Acc:VGNC:27326]	Environmental Information Processing;Organismal Systems;Human Diseases	Signaling molecules and interaction;Nervous system;Substance dependence	ko04080//Neuroactive ligand-receptor interaction;ko04725//Cholinergic synapse;ko05033//Nicotine addiction	K04806;K04806;K04806	GO:0005886//plasma membrane;GO:0005887//integral component of plasma membrane;GO:0005892//acetylcholine-gated channel complex;GO:0016020//membrane;GO:0016021//integral component of membrane;GO:0030054//cell junction;GO:0043005//neuron projection;GO:0045202//synapse;GO:0045211//postsynaptic membrane	GO:0004888//transmembrane signaling receptor activity;GO:0005216//ion channel activity;GO:0005230//extracellular ligand-gated ion channel activity;GO:0015464//acetylcholine receptor activity;GO:0022848//acetylcholine-gated cation-selective channel activity;GO:0030594//neurotransmitter receptor activity	GO:0001666//response to hypoxia;GO:0006281//DNA repair;GO:0006811//ion transport;GO:0006979//response to oxidative stress;GO:0007165//signal transduction;GO:0007268//chemical synaptic transmission;GO:0007271//synaptic transmission, cholinergic;GO:0034220//ion transmembrane transport;GO:0035094//response to nicotine;GO:0035095//behavioral response to nicotine;GO:0042391//regulation of membrane pot…
novel_circ_016414	ENSBTAG00000046256	ENSBTAG00000019291	0.946435	3	1	1	bta-miR-455-3p	0.0258621	GRB14	growth factor receptor bound protein 14 [Source:VGNC Symbol;Acc:VGNC:29630]	-	-	-	-	GO:0005737//cytoplasm;GO:0005886//plasma membrane;GO:0043231//intracellular membrane-bounded organelle	GO:0030674//protein binding, bridging;GO:0030971//receptor tyrosine kinase binding	GO:0007165//signal transduction;GO:0008286//insulin receptor signaling pathway;GO:0046627//negative regulation of insulin receptor signaling pathway
novel_circ_016414	ENSBTAG00000046256	ENSBTAG00000033983	0.959463	3	1	1	miR-34-x	0.0258621	MAP2K1	mitogen-activated protein kinase kinase 1 [Source:VGNC Symbol;Acc:VGNC:31183]	Human Diseases;Environmental Information Processing;Human Diseases;Human Diseases;Environmental Information Processing;Human Diseases;Environmental Information Processing;Human Diseases;Environmental Information Processing;Human Diseases;Human Diseases;Human Diseases;Environmental Information Processing;Cellular Processes;Human Diseases;Human Diseases;Cellular Processes;Organismal Systems;Cellula…	Cancers;Signal transduction;Neurodegenerative diseases;Infectious diseases;Signal transduction;Infectious diseases;Signal transduction;Infectious disease: viral;Signal transduction;Infectious diseases;Infectious diseases;Substance dependence;Signal transduction;Cell motility;Cancers;Infectious diseases;Cellular community - eukaryotes;Immune system;Cell growth and death;Infectious disease: bacteri…	ko05200//Pathways in cancer;ko04151//PI3K-Akt signaling pathway;ko05010//Alzheimer disease;ko05165//Human papillomavirus infection;ko04014//Ras signaling pathway;ko05166//HTLV-I infection;ko04010//MAPK signaling pathway;ko05170//Human immunodeficiency virus 1 infection;ko04015//Rap1 signaling pathway;ko05132//Salmonella infection;ko05163//Human cytomegalovirus infection;ko05034//Alcoholism;ko0402…	K04368;K04368;K04368;K04368;K04368;K04368;K04368;K04368;K04368;K04368;K04368;K04368;K04368;K04368;K04368;K04368;K04368;K04368;K04368;K04368;K04368;K04368;K04368;K04368;K04368;K04368;K04368;K04368;K04368;K04368;K04368;K04368;K04368;K04368;K04368;K04368;K04368;K04368;K04368;K04368;K04368;K04368;K04368;K04368;K04368;K04368;K04368;K04368;K04368;K04368;K04368;K04368;K04368;K04368;K04368;K04368;K04368;…	GO:0005783//endoplasmic reticulum;GO:0005829//cytosol;GO:0005886//plasma membrane	GO:0000166//nucleotide binding;GO:0004672//protein kinase activity;GO:0004674//protein serine/threonine kinase activity;GO:0004708//MAP kinase kinase activity;GO:0005078//MAP-kinase scaffold activity;GO:0005524//ATP binding;GO:0008022//protein C-terminus binding;GO:0043539//protein serine/threonine kinase activator activity;GO:0047485//protein N-terminus binding;GO:0097110//scaffold protein bindi…	GO:0000187//activation of MAPK activity;GO:0006468//protein phosphorylation;GO:0007050//cell cycle arrest;GO:0007507//heart development;GO:0008285//negative regulation of cell proliferation;GO:0010628//positive regulation of gene expression;GO:0010629//negative regulation of gene expression;GO:0018107//peptidyl-threonine phosphorylation;GO:0021697//cerebellar cortex formation;GO:0030182//neuron d…
novel_circ_016414	ENSBTAG00000046256	ENSBTAG00000045633	0.984996	3	2	2	bta-miR-455-3p|miR-34-x	0.000449775	AGTR1	angiotensin II receptor type 1 [Source:VGNC Symbol;Acc:VGNC:25745]	Human Diseases;Environmental Information Processing;Environmental Information Processing;Environmental Information Processing;Environmental Information Processing;Human Diseases;Organismal Systems;Environmental Information Processing;Organismal Systems;Human Diseases;Organismal Systems;Organismal Systems;Organismal Systems;Organismal Systems	Cancers;Signaling molecules and interaction;Signal transduction;Signal transduction;Signal transduction;Endocrine and metabolic diseases;Circulatory system;Signal transduction;Circulatory system;Endocrine and metabolic diseases;Endocrine system;Endocrine system;Endocrine system;Endocrine system	ko05200//Pathways in cancer;ko04080//Neuroactive ligand-receptor interaction;ko04020//Calcium signaling pathway;ko04022//cGMP - PKG signaling pathway;ko04072//Phospholipase D signaling pathway;ko04934//Cushing syndrome;ko04261//Adrenergic signaling in cardiomyocytes;ko04371//Apelin signaling pathway;ko04270//Vascular smooth muscle contraction;ko04933//AGE-RAGE signaling pathway in diabetic compli…	K04166;K04166;K04166;K04166;K04166;K04166;K04166;K04166;K04166;K04166;K04166;K04166;K04166;K04166	GO:0005886//plasma membrane;GO:0016021//integral component of membrane	GO:0001596//angiotensin type I receptor activity;GO:0004930//G protein-coupled receptor activity;GO:0004945//angiotensin type II receptor activity;GO:0031711//bradykinin receptor binding;GO:0046982//protein heterodimerization activity	GO:0001822//kidney development;GO:0007186//G protein-coupled receptor signaling pathway;GO:0007204//positive regulation of cytosolic calcium ion concentration;GO:0007266//Rho protein signal transduction;GO:0010873//positive regulation of cholesterol esterification;GO:0019229//regulation of vasoconstriction;GO:0019722//calcium-mediated signaling;GO:0032270//positive regulation of cellular protein …
novel_circ_016414	ENSBTAG00000046256	ENSBTAG00000054046	0.949575	3	1	1	miR-34-x	0.0258621	-	XP_032321794.1 ankyrin repeat domain-containing protein 24 isoform X4 [Camelus ferus]	-	-	-	-	-	-	-
novel_circ_016643	ENSBTAG00000014991	ENSBTAG00000019625	0.901272	6	9	4	bta-miR-135b|bta-miR-218|miR-218-x|miR-218-z	0.000245386	EHHADH	enoyl-CoA hydratase and 3-hydroxyacyl CoA dehydrogenase [Source:VGNC Symbol;Acc:VGNC:53541]	Metabolism;Metabolism;Cellular Processes;Organismal Systems;Metabolism;Metabolism;Metabolism;Metabolism;Metabolism;Metabolism;Metabolism;Metabolism	Global and overview maps;Global and overview maps;Transport and catabolism;Endocrine system;Amino acid metabolism;Global and overview maps;Amino acid metabolism;Amino acid metabolism;Lipid metabolism;Metabolism of other amino acids;Carbohydrate metabolism;Carbohydrate metabolism	ko01100//Metabolic pathways;ko01200//Carbon metabolism;ko04146//Peroxisome;ko03320//PPAR signaling pathway;ko00310//Lysine degradation;ko01212//Fatty acid metabolism;ko00280//Valine, leucine and isoleucine degradation;ko00380//Tryptophan metabolism;ko00071//Fatty acid degradation;ko00410//beta-Alanine metabolism;ko00640//Propanoate metabolism;ko00650//Butanoate metabolism	K07514;K07514;K07514;K07514;K07514;K07514;K07514;K07514;K07514;K07514;K07514;K07514	GO:0005777//peroxisome	GO:0003824//catalytic activity;GO:0003857//3-hydroxyacyl-CoA dehydrogenase activity;GO:0004300//enoyl-CoA hydratase activity;GO:0016491//oxidoreductase activity;GO:0016509//long-chain-3-hydroxyacyl-CoA dehydrogenase activity;GO:0016616//oxidoreductase activity, acting on the CH-OH group of donors, NAD or NADP as acceptor;GO:0019899//enzyme binding;GO:0070403//NAD+ binding	GO:0006629//lipid metabolic process;GO:0006631//fatty acid metabolic process;GO:0006635//fatty acid beta-oxidation;GO:0055114//oxidation-reduction process
novel_circ_016650	ENSBTAG00000010169	ENSBTAG00000049058	0.923647	3	8	2	bta-miR-302b|bta-miR-33a	0.0121518	INHBB	inhibin subunit beta B [Source:VGNC Symbol;Acc:VGNC:30201]	Environmental Information Processing;Cellular Processes;Environmental Information Processing	Signaling molecules and interaction;Cellular community - eukaryotes;Signal transduction	ko04060//Cytokine-cytokine receptor interaction;ko04550//Signaling pathways regulating pluripotency of stem cells;ko04350//TGF-beta signaling pathway	K22687;K22687;K22687	GO:0005576//extracellular region;GO:0005615//extracellular space;GO:0048471//perinuclear region of cytoplasm;GO:0071944//cell periphery	GO:0005125//cytokine activity;GO:0005179//hormone activity;GO:0008083//growth factor activity;GO:0042803//protein homodimerization activity	GO:0009267//cellular response to starvation;GO:0009611//response to wounding;GO:0010862//positive regulation of pathway-restricted SMAD protein phosphorylation;GO:0032686//negative regulation of hepatocyte growth factor production;GO:0032869//cellular response to insulin stimulus;GO:0032924//activin receptor signaling pathway;GO:0044320//cellular response to leptin stimulus;GO:0045444//fat cell d…
novel_circ_016701	ENSBTAG00000018347	ENSBTAG00000034147	0.972685	2	1	1	miR-11977-z	0.0172414	OLFML2B	olfactomedin like 2B [Source:VGNC Symbol;Acc:VGNC:32423]	-	-	-	-	GO:0031012//extracellular matrix	GO:0042802//identical protein binding;GO:0050840//extracellular matrix binding	GO:0030198//extracellular matrix organization
novel_circ_016741	ENSBTAG00000000191	ENSBTAG00000012144	0.929292	2	2	1	miR-10926-z	0.0343328	ZMYND19	zinc finger MYND-type containing 19 [Source:VGNC Symbol;Acc:VGNC:37205]	-	-	-	-	GO:0005737//cytoplasm;GO:0016020//membrane;GO:0045202//synapse	-	-
novel_circ_016741	ENSBTAG00000000191	ENSBTAG00000013974	0.987945	2	3	2	miR-10926-z|miR-497-y	0.000449775	TMEM215	transmembrane protein 215 [Source:VGNC Symbol;Acc:VGNC:36037]	-	-	-	-	-	-	-
novel_circ_016741	ENSBTAG00000000191	ENSBTAG00000018307	0.925466	2	1	1	miR-10926-z	0.0172414	SEMA3F	semaphorin 3F [Source:VGNC Symbol;Acc:VGNC:34431]	Organismal Systems	Development	ko04360//Axon guidance	K06840	GO:0005615//extracellular space;GO:0005887//integral component of plasma membrane;GO:0098978//glutamatergic synapse	GO:0005515//protein binding;GO:0030215//semaphorin receptor binding;GO:0045499//chemorepellent activity	GO:0001755//neural crest cell migration;GO:0007411//axon guidance;GO:0021612//facial nerve structural organization;GO:0021637//trigeminal nerve structural organization;GO:0021675//nerve development;GO:0021785//branchiomotor neuron axon guidance;GO:0030335//positive regulation of cell migration;GO:0036486//ventral trunk neural crest cell migration;GO:0048843//negative regulation of axon extension …
novel_circ_016741	ENSBTAG00000000191	ENSBTAG00000022580	0.971839	2	1	1	miR-497-y	0.0172414	INKA2	inka box actin regulator 2 [Source:VGNC Symbol;Acc:VGNC:50127]	-	-	-	-	GO:0005634//nucleus;GO:0005654//nucleoplasm	GO:0019901//protein kinase binding;GO:0030291//protein serine/threonine kinase inhibitor activity	-
novel_circ_016812	ENSBTAG00000054948	ENSBTAG00000002997	0.919044	3	4	3	bta-miR-218|miR-218-x|miR-218-z	1.57816e-05	ADAMTSL1	ADAMTS like 1 [Source:VGNC Symbol;Acc:VGNC:58359]	-	-	-	-	GO:0031012//extracellular matrix	GO:0004222//metalloendopeptidase activity	GO:0006508//proteolysis;GO:0030198//extracellular matrix organization
novel_circ_016812	ENSBTAG00000054948	ENSBTAG00000005104	0.941193	3	3	2	bta-miR-218|miR-218-x	0.00134143	MGAT5B	alpha-1,6-mannosylglycoprotein 6-beta-N-acetylglucosaminyltransferase B [Source:VGNC Symbol;Acc:VGNC:55847]	Metabolism;Metabolism;Metabolism	Global and overview maps;Glycan biosynthesis and metabolism;Glycan biosynthesis and metabolism	ko01100//Metabolic pathways;ko00510//N-Glycan biosynthesis;ko00515//Mannose type O-glycan biosyntheis	K09661;K09661;K09661	GO:0000139//Golgi membrane;GO:0005794//Golgi apparatus;GO:0016020//membrane;GO:0016021//integral component of membrane	GO:0016740//transferase activity;GO:0016757//transferase activity, transferring glycosyl groups;GO:0030144//alpha-1,6-mannosylglycoprotein 6-beta-N-acetylglucosaminyltransferase activity;GO:0030145//manganese ion binding	GO:0006486//protein glycosylation;GO:0006487//protein N-linked glycosylation;GO:0018215//protein phosphopantetheinylation;GO:0018242//protein O-linked glycosylation via serine
novel_circ_016812	ENSBTAG00000054948	ENSBTAG00000009338	0.993848	3	4	3	bta-miR-218|miR-218-x|miR-218-z	1.57816e-05	LRRC7	leucine rich repeat containing 7 [Source:VGNC Symbol;Acc:VGNC:55251]	-	-	-	-	-	GO:0005515//protein binding	-
novel_circ_016812	ENSBTAG00000054948	ENSBTAG00000014194	0.933635	3	11	3	bta-miR-218|miR-218-x|miR-218-z	0.00065099	ADARB2	adenosine deaminase RNA specific B2 (inactive) [Source:NCBI gene (formerly Entrezgene);Acc:524061]	-	-	-	-	GO:0005730//nucleolus;GO:0005737//cytoplasm	GO:0003723//RNA binding;GO:0003725//double-stranded RNA binding;GO:0003726//double-stranded RNA adenosine deaminase activity;GO:0004000//adenosine deaminase activity;GO:0008251//tRNA-specific adenosine deaminase activity	GO:0006382//adenosine to inosine editing;GO:0006396//RNA processing
novel_circ_016812	ENSBTAG00000054948	ENSBTAG00000017420	0.930711	3	3	3	bta-miR-218|miR-218-x|miR-218-z	3.9454e-06	ZMAT4	zinc finger matrin-type 4 [Source:VGNC Symbol;Acc:VGNC:37193]	-	-	-	-	-	GO:0003676//nucleic acid binding;GO:0008270//zinc ion binding	-
novel_circ_016812	ENSBTAG00000054948	ENSBTAG00000020318	0.952732	3	5	2	bta-miR-218|miR-218-x	0.00441884	DBNDD1	dysbindin domain containing 1 [Source:VGNC Symbol;Acc:VGNC:27891]	-	-	-	-	GO:0005737//cytoplasm	-	-
novel_circ_016812	ENSBTAG00000054948	ENSBTAG00000049058	0.966343	3	8	2	bta-miR-218|miR-218-x	0.0121518	INHBB	inhibin subunit beta B [Source:VGNC Symbol;Acc:VGNC:30201]	Environmental Information Processing;Cellular Processes;Environmental Information Processing	Signaling molecules and interaction;Cellular community - eukaryotes;Signal transduction	ko04060//Cytokine-cytokine receptor interaction;ko04550//Signaling pathways regulating pluripotency of stem cells;ko04350//TGF-beta signaling pathway	K22687;K22687;K22687	GO:0005576//extracellular region;GO:0005615//extracellular space;GO:0048471//perinuclear region of cytoplasm;GO:0071944//cell periphery	GO:0005125//cytokine activity;GO:0005179//hormone activity;GO:0008083//growth factor activity;GO:0042803//protein homodimerization activity	GO:0009267//cellular response to starvation;GO:0009611//response to wounding;GO:0010862//positive regulation of pathway-restricted SMAD protein phosphorylation;GO:0032686//negative regulation of hepatocyte growth factor production;GO:0032869//cellular response to insulin stimulus;GO:0032924//activin receptor signaling pathway;GO:0044320//cellular response to leptin stimulus;GO:0045444//fat cell d…
novel_circ_016812	ENSBTAG00000054948	ENSBTAG00000051600	0.951001	3	4	2	bta-miR-218|miR-218-x	0.00266709	-	XP_032263750.1 A-kinase anchoring protein 7 isoform X3 [Phoca vitulina]	-	-	-	-	GO:0005829//cytosol	GO:0034237//protein kinase A regulatory subunit binding	GO:0010738//regulation of protein kinase A signaling
novel_circ_016821	ENSBTAG00000027321	ENSBTAG00000020159	0.94707	7	5	2	bta-miR-137|novel-m0094-3p	0.0287953	NKAIN1	sodium/potassium transporting ATPase interacting 1 [Source:VGNC Symbol;Acc:VGNC:32091]	-	-	-	-	GO:0005886//plasma membrane;GO:0016020//membrane;GO:0016021//integral component of membrane	GO:0051117//ATPase binding	-
novel_circ_016846	NA	ENSBTAG00000006282	0.946893	24	4	3	bta-miR-7865|novel-m0011-5p|novel-m0094-3p	0.0274898	POU2AF1	POU class 2 homeobox associating factor 1 [Source:VGNC Symbol;Acc:VGNC:33173]	-	-	-	-	GO:0090575//RNA polymerase II transcription factor complex	GO:0003677//DNA binding;GO:0003713//transcription coactivator activity	GO:0002314//germinal center B cell differentiation;GO:0032755//positive regulation of interleukin-6 production;GO:0045944//positive regulation of transcription by RNA polymerase II;GO:0098586//cellular response to virus
novel_circ_016846	NA	ENSBTAG00000018383	0.962661	24	8	8	bta-miR-139|bta-miR-200b|bta-miR-217|bta-miR-429|bta-miR-539|miR-11977-z|miR-200-y|miR-200-z	1.15768e-06	ATAD5	ATPase family AAA domain containing 5 [Source:VGNC Symbol;Acc:VGNC:26235]	-	-	-	-	GO:0005634//nucleus;GO:0031391//Elg1 RFC-like complex	GO:0003677//DNA binding;GO:0005524//ATP binding;GO:0016887//ATPase activity;GO:0061860//DNA clamp unloader activity	GO:0006974//cellular response to DNA damage stimulus;GO:0008283//cell proliferation;GO:0008630//intrinsic apoptotic signaling pathway in response to DNA damage;GO:0030890//positive regulation of B cell proliferation;GO:0033260//nuclear DNA replication;GO:0042770//signal transduction in response to DNA damage;GO:0042771//intrinsic apoptotic signaling pathway in response to DNA damage by p53 class …
novel_circ_016859	ENSBTAG00000026611	ENSBTAG00000013974	0.928976	1	3	1	miR-10926-z	0.0258621	TMEM215	transmembrane protein 215 [Source:VGNC Symbol;Acc:VGNC:36037]	-	-	-	-	-	-	-
[truncated: 371 more rows]

## Sheet: TableS5
Table S5. The ceRNA regulatory network in the pituitary of dairy cows under HS
[truncated: 149,019 more rows]

## Sheet: TableS6
Table S6. The ceRNA regulatory network in the mammary gland of dairy cows under HS
[truncated: 2,269 more rows]

## Sheet: TableS7
	Table S7. Primer sequences of circRNA and mRNA
[truncated: 20 more rows]

## Sheet: TableS8
	Table S8. Primer sequences of miRNA
[truncated: 12 more rows]
